1 **The alternative sigma factor  $\sigma^X$  mediates competence shut-off at the cell pole**  
2 **in *Streptococcus pneumoniae*.**

3

4 Calum JOHNSTON<sup>1,2</sup>, Anne-Lise SOULET<sup>1,2</sup>, Matthieu BERGE<sup>1,2,3</sup>, Marc PRUDHOMME<sup>1,2</sup>, David DE  
5 LEMOS<sup>1,2</sup>, Patrice POLARD<sup>1,2,4</sup>.

6 1. Laboratoire de Microbiologie et Génétique Moléculaires, UMR5100, Centre de Biologie Intégrative (CBI), Centre Nationale  
7 de la Recherche Scientifique (CNRS), Toulouse, France.

8 2. Université Paul Sabatier (Toulouse III), Toulouse, France.

9 3. Dept. Microbiology and Molecular Medicine, Institute of Genetics & Genomics in Geneva (iGE3), Faculty of Medicine,  
10 University of Geneva, Geneva, Switzerland.

11 4. Corresponding author

12

13 **Keywords**

14 Competence regulation, competence shut-off, alternative sigma factor,  $\sigma^X$ , DprA.

15

16

17

18

19

20

21

22

23

24 **Summary**

25 Bacterial competence for genetic transformation is a well-known species-specific differentiation  
26 program driving genome plasticity, antibiotic resistance and virulence in many pathogens. How  
27 competence regulation is spatiotemporally integrated in the cell is ill-defined. Here, we unraveled the  
28 localization dynamics of the key regulators that master the two intertwined transcription waves  
29 controlling competence in *Streptococcus pneumoniae*. The first wave relies on a stress-inducible  
30 phosphorelay system, made up of the ComD and ComE proteins, and the second is directed by an  
31 alternative sigma factor,  $\sigma^X$ , which includes in its regulon the DprA protein that turns off competence  
32 through interaction with phosphorylated ComE. Remarkably, we found that ComD,  $\sigma^X$  and DprA stably  
33 co-localize at a single cell pole over the competence period. In contrast, ComE assembles into dynamic  
34 patches in the cell periphery, colocalizing temporarily with DprA and ComD at the pole. Furthermore,  
35 we provide evidence that  $\sigma^X$  directly conveys DprA polar anchoring. Through this protein targeting  
36 function,  $\sigma^X$  is shown to be actively involved in the timely shut-off of the competence cycle, hence  
37 preserving cell fitness. Altogether, this study unveils an unprecedented role for a bacterial  
38 transcription  $\sigma$  factor in spatially coordinating the negative feedback loop of its own genetic circuit.

39

40

41

42

43

44

45

46

## 47 **Introduction**

48 In bacteria, sigma ( $\sigma$ ) factors are essential transcription effectors that direct the RNA polymerase  
49 to and activate RNA synthesis at specific genes promoters. All bacterial species encode a single, highly  
50 conserved  $\sigma$  factor that drives the expression of house-keeping genes essential for vegetative growth  
51 and cell homeostasis. In addition, many bacteria encode a variable set of alternative  $\sigma$  factors that  
52 control specific regulons, providing appropriate properties to the cells in response to various stimuli.  
53 These alternative  $\sigma$  factors play pivotal roles in the multifaceted lifestyles of bacteria. They trigger  
54 specific developmental programs, such as sporulation or biofilm formation, as well as adapted  
55 responses to multiple types of stress and virulence in some pathogenic species (Kazmierczak et al.,  
56 2005). How these alternative  $\sigma$  factors are activated in the cell has been extensively studied, revealing  
57 multiple mechanisms underlying their finely tuned regulation (Österberg et al., 2011a). However, how  
58 these mechanisms are orchestrated spatiotemporally within the cell remains poorly understood.

59 The human pathogen *Streptococcus pneumoniae* (the pneumococcus) possesses a unique  
60 alternative  $\sigma$  factor  $\sigma^x$  (Lee and Morrison, 1999). It is key to the regulatory circuit controlling the  
61 transient differentiation state of competence. Pneumococcal competence is induced in response to  
62 multiple types of stresses, such as antibiotic exposure (Prudhomme et al., 2006; Slager et al., 2014).  
63 This induction modifies the transcriptional expression of up to 17% of genes (Aprianto et al., 2018a;  
64 Dagkessamanskaia et al., 2004a; Peterson et al., 2004; Slager et al., 2019). Competence is a key feature  
65 in the lifestyle of pneumococci as it promotes natural transformation, a horizontal gene transfer  
66 process widespread in bacteria that facilitates adaptation by acquisition of new genetic traits (Johnston  
67 et al., 2014). In addition, pneumococcal competence development provides the cells with the ability  
68 to attack non-competent cells, a scavenging property defined as fratricide (Claverys and Håvarstein,  
69 2007), is involved in biofilm formation (Aggarwal et al., 2018; Vidal et al., 2013) and virulence (Johnston  
70 et al., 2018; Lin et al., 2016; Lin and Lau, 2019; Zhu et al., 2015).

71 Pneumococcal competence induction is primarily regulated by a positive feedback loop  
72 involving the genes encoded by the *comAB* and *comCDE* operons (Figure 1A). The *comC* gene codes for  
73 a peptide pheromone coordinating competence development within the growing cell population. This  
74 peptide, accordingly named CSP (Competence Stimulating Peptide), is secreted by the dedicated  
75 ComAB transporter (Hui et al., 1995). After export, it promotes autophosphorylation of the membrane-  
76 bound two-component system (TCS) histidine kinase (HK) ComD, which in turn phosphorylates its  
77 cognate intracellular response regulator (RR) ComE (Figure 1A). Phosphorylated ComE (ComE~P)  
78 specifically induces the expression of 25 genes, which include the *comAB* and *comCDE* operons,  
79 generating a positive feedback loop that controls competence development. Conversely,  
80 unphosphorylated ComE acts as repressor of its own regulon, the expression of which is thus  
81 modulated by the ComE/ComE~P ratio (Martin et al., 2013). The ComE regulon includes two identical  
82 genes encoding  $\sigma^X$ , named *comX1* and *comX2* (Lee and Morrison, 1999). The  $\sigma^X$  regulon comprises ~60  
83 genes, with ~20 involved in natural transformation (Claverys et al., 2006; Peterson et al., 2004), 5 in  
84 fratricide (Claverys and Håvarstein, 2007) but the majority having undefined roles. The reason why the  
85  $\sigma^X$ -encoding gene is duplicated is unknown, the inactivation of one of them having no impact on  
86 transformation (Lee and Morrison, 1999). To fully activate transcription,  $\sigma^X$  needs to be assisted by  
87 ComW, another protein whose production is controlled by ComE~P (Luo et al., 2004). ComW is  
88 proposed to help  $\sigma^X$  association with the RNA polymerase at promoter sequences presenting the  
89 consensual 8 bp *cin* box motif (Peterson et al., 2004; Sung and Morrison, 2005). Altogether, ComE~P  
90 and  $\sigma^X$  trigger two successive waves of competence (*com*) gene transcription, commonly referred to  
91 as early and late, respectively. Importantly, competence shut-off is mediated by the late *com* protein  
92 DprA (Mirouze et al., 2013; Weng et al., 2013), which directly interacts with ComE~P to turn-off  
93 ComE~P-dependent transcription (Mirouze et al., 2013). In addition to defining the negative feedback  
94 loop of the pneumococcal competence regulatory circuit, DprA also plays a crucial, conserved role in  
95 transformation by mediating RecA polymerization onto transforming ssDNA to facilitate homologous  
96 recombination (Mortier-Barrière et al., 2007; Cheruel et al., 2012) (Figure 1A). Over 8,000 molecules

97 of DprA are produced per competent cell (Mirouze et al., 2013). Although only ~300-600 molecules  
98 were required for optimal transformation, full expression of *dprA* was required for optimal  
99 competence shut-off (Johnston et al., 2018). Uncontrolled competence induction in cells lacking DprA  
100 results in a large *in vitro* growth defect, and high cellular levels of DprA thus maintain the fitness of the  
101 competent population and of resulting transformants (Johnston et al., 2018). In addition, inactivation  
102 of *dprA* was shown to be highly detrimental for development of pneumococcal infection, dependent  
103 on the ability of cells to develop competence (Lin and Lau, 2019; Zhu et al., 2015). Together, these  
104 studies showed that the DprA-mediated shut-off of pneumococcal competence is key for  
105 pneumococcal cell fitness.

106         A hallmark of pneumococcal competence is its tight temporal window, which lasts less than 30  
107 minutes in actively dividing cells (Alloing et al., 1998; Håvarstein et al., 1995). How this regulation is  
108 coordinated within the cell remains unknown. Here, we studied the choreography of pneumococcal  
109 competence induction and shut-off at the single cell level by tracking the spatiotemporal localization  
110 of the main effectors of these processes, DprA,  $\sigma^X$ , ComW, ComD, ComE and exogenous CSP.  
111 Remarkably, DprA,  $\sigma^X$ , ComD, CSP and to some extent ComE were found to colocalize at a single cell  
112 pole during competence. This study revealed that the entire pneumococcal competence cycle occurs  
113 at cell pole, from its induction triggered by ComD, ComE and CSP to its shut-off mediated by DprA and  
114 assisted by  $\sigma^X$ . In this regulatory mechanism,  $\sigma^X$  is found to exert an unprecedented role for a  $\sigma$  factor.  
115 In addition to directing the transcription of the *dprA* gene,  $\sigma^X$  associates with and anchors DprA at the  
116 same cellular pole where ComD and CSP are located, allowing this repressor to interact with newly  
117 activated ComE~P and promoting timely extinction of the whole transcriptional regulatory circuit of  
118 competence.

119

120

121

## 122 **Results**

### 123 ***DprA displays a polar localization in competent cells, which correlates with competence shut-off.***

124 To investigate the localization of DprA during competence in live cells, we used a fluorescent  
125 fusion protein DprA-GFP, produced from the native *dprA* locus (Figure S1A). DprA-GFP was synthesized  
126 during competence and remained stable up to 90 minutes after induction (Figure 1B), similarly to  
127 wildtype DprA (Mirouze et al., 2013), without degradation (Figure S1B). A strain possessing DprA-GFP  
128 was almost fully functional in transformation (Figure S1C), but partially altered in competence shut-off  
129 (Figure S1D). In pneumococcal cells induced with exogenous CSP, the peak of competence induction  
130 occurs 15-20 minutes after induction. 15 minutes after competence induction, DprA-GFP showed a  
131 diffuse cytoplasmic localization, punctuated by discrete foci of varying intensity (Figure 1C). The  
132 distribution and localization of DprA-GFP foci was analyzed by MicrobeJ (Ducret et al., 2016), with  
133 results presented as focus density maps ordered by cell length. Spots represent the localization of a  
134 DprA-GFP focus on a representative half pneumococcal cell, while spot colour represents density of  
135 foci at a particular cellular location. DprA-GFP foci were present in 70% of cells, predominantly at a  
136 single cell pole (Figure 1DE). To ascertain whether the polar localization of DprA-GFP was due to the  
137 GFP tag or represented functional localization, we carried out immunofluorescence microscopy with  
138 competent cells possessing wildtype DprA using  $\alpha$ -DprA antibodies. Results showed that native DprA  
139 exhibited a similar accumulation pattern as the DprA-GFP foci upon competence induction (Figure 1F).

140 Next, to explore the relation between these foci and the dual role of DprA in transformation  
141 and competence regulation, we investigated focus formation in cells possessing a previously published  
142 mutation in DprA impairing its dimerization (DprA<sup>AR</sup>) (Quevillon-Cheruel et al., 2012). This mutant  
143 strongly affected both transformation and competence shut-off (Mirouze et al., 2013; Quevillon-  
144 Cheruel et al., 2012). Results showed that 15 minutes after competence induction, DprA<sup>AR</sup>-GFP did not  
145 form foci, despite being produced at wildtype levels (Figure S1E). DprA thus accumulates at the cell  
146 pole during competence, dependent on its ability to dimerize. To explore whether the polar foci of

147 DprA were involved in its role in transformation, or competence shut-off, we began by investigating  
148 how a *dprA<sup>QNO</sup>* mutation, specifically abrogating the interaction between DprA and RecA and thus  
149 affecting transformation (Quevillon-Cheruel et al., 2012), affected the localization of DprA-GFP. 15  
150 minutes after competence induction, the DprA<sup>QNO</sup>-GFP mutant formed polar foci at wildtype levels  
151 (Figure S1F). In addition, the inactivation of *comEC*, encoding for an essential protein of the  
152 transmembrane DNA entry pore (Pestova and Morrison, 1998), or *recA*, encoding the recombinase  
153 with which DprA interacts during transformation (Mortier-Barrière et al., 2007), did not alter the  
154 frequency or localization of DprA-GFP foci (Figure S1GH). Altogether, these results suggested that the  
155 polar foci of DprA-GFP were not related to the DNA entry or recombination steps of transformation  
156 but could be linked to competence shut-off.

157 We recently reported that optimal competence shut-off relies on the maximal cellular  
158 concentration of DprA (~8000 molecules), but this level could be reduced by 10 fold while still  
159 maintaining wildtype frequency of transformation (Johnston et al., 2018). This conclusion was  
160 obtained by expressing *dprA* under the control of the IPTG-inducible  $P_{lac}$  promoter (*CEP<sub>lac</sub>-dprA*), which  
161 enables the modulation of the cellular concentration of DprA by varying IPTG concentration in the  
162 growth medium. Here, we reproduced these experiments with the DprA-GFP fusion, to test whether  
163 its concentration correlates with the formation of polar foci in competent cells. The expression,  
164 transformation and competence profiles of a *dprA*<sup>-</sup> mutant strain harbouring the ectopic *CEP<sub>lac</sub>-dprA-*  
165 *gfp* construct in varying concentrations of IPTG (Figure S2ABC) were equivalent to those reported  
166 previously for *CEP<sub>lac</sub>-dprA* (Johnston et al., 2018). Notably, a steady decrease in DprA-GFP foci was  
167 observed as IPTG was reduced (Figure 2AB). When comparing the cellular localization of DprA-GFP foci,  
168 a sharp reduction in the proportion of polar foci was observed as IPTG was reduced, with most of the  
169 remaining foci observed at midcell and appearing weaker in intensity (Figure 2AC). This shift correlated  
170 with a progressive loss of competence shut-off (Figure S2C), presenting a strong link between the  
171 presence of polar DprA-GFP foci and the shut-off of pneumococcal competence. Altogether, these

172 results strongly support the notion that the polar foci of DprA-GFP represent the subcellular site where  
173 DprA mediates competence shut-off.

174 Finally, to further explore the temporal dynamics of these DprA-GFP foci, their distribution  
175 within competent cells was analyzed over the competence period and beyond. The results are  
176 presented in **Figure 3A** as focus density maps ordered by cell length. The number of cells with foci, as  
177 well as their intensity, was found to increase gradually to reach a maximum of 74% at 30 minutes after  
178 competence induction (**Figure 3A**), with the majority of cells possessing a single focus that persisted  
179 long after induction (**Figure 3B**). Notably, the DprA-GFP foci localization pattern rapidly evolved from  
180 a central position to a single cell pole (**Figure 3C**). DprA-GFP foci were not observed in a particular cell  
181 type, with found in small, large or constricted cells throughout competence (**Figure 3C**). Finally,  
182 tracking DprA-GFP foci formed in the cells after 10 minutes of competence induction by time-lapse  
183 microscopy showed that once generated, they remained static over 20 minutes (**Figure S1IJ, Movie 1**).  
184 In conclusion, DprA-GFP forms discrete and static polar foci during competence, with most cells  
185 possessing a single focus. This polar localization of DprA correlates with its regulatory role in  
186 competent shut-off.

187

### 188 ***The polar localization of DprA-GFP requires induction of the late com genes***

189 Transcriptional expression of *dprA* is only detected during competence (Aprianto et al., 2018a;  
190 Dagkessamanskaia et al., 2004a; Peterson et al., 2004). To explore whether a competence-specific  
191 factor was required for the formation of polar DprA-GFP foci during competence, *dprA-gfp* was  
192 ectopically expressed from a promoter inducible by the BIP peptide in *dprA*<sup>-</sup> cells. This BIP-derived  
193 induction mimics rapid, strong induction by CSP during competence (Johnston et al., 2016). These cells  
194 were found to produce stable DprA-GFP after exposure to BIP, and upon addition of CSP to the growth  
195 medium, to transform at wild-type levels and to partially shut-off competence (**Figure S3**). However,  
196 BIP-induced production of DprA-GFP in the absence of CSP resulted in the formation of weak, barely



197 detectable polar foci in only 10% of non-competent cells (Figure 4AB). In comparison, 47% of cells  
198 producing DprA-GFP during competence formed bright polar foci (Figure 4AB). This stark increase in  
199 DprA-GFP foci showed that a competence-specific factor was crucial for their formation and anchoring  
200 at the cell pole. To explore whether the competence-specific factor needed for the polar localization  
201 of DprA-GFP in competent cells was part of the early or late *com* regulons, we generated two  
202 constructs allowing us to artificially control DprA-GFP expression and either one or the other of these  
203 two connected regulons (Figure 4CD and Supplementary methods). Observation of DprA-GFP in  
204 conditions where only late *com* genes were induced revealed the presence of polar foci at wildtype  
205 levels (Figure 4EF). Conversely, no foci were observed when DprA-GFP was ectopically expressed with  
206 only the early *com* genes (Figure 4E), showing that late *com* regulon expression was required for the  
207 polar accumulation of DprA-GFP.

208

### 209 ***The polar localization of DprA-GFP depends on the alternative sigma factor $\sigma^x$***

210 The late *com* regulon is comprised of 62 genes, organized in 18 operons (Claverys et al., 2006;  
211 Dagkessamanskaia et al., 2004b; Peterson et al., 2004). To identify the hypothetical late *com* gene  
212 product needed for DprA localization at the cell pole, the *cin* boxes that define the late *com* promoters  
213 were individually mutated, generating a panel of 18 mutant strains, each lacking the ability to induce  
214 a specific late *com* operon. The inactivation was validated by comparing transformation efficiency in  
215 three strains, where *cin* box inactivation mirrored gene knockout levels (Table S1, and Supplementary  
216 methods). Visualization of the red fluorescent fusion DprA-mKate2 showed that in all 18 mutants,  
217 DprA-mKate2 formed foci at levels and localization comparable to wildtype (Table S2). This result  
218 contrasted with our previous result (Figure 4E), which suggested that expression of the late *com*  
219 regulon was required for formation of polar DprA-GFP foci, causing us to revisit our interpretation of  
220 Figure 4C-F. In fact, to express only the early *com* regulon, we inactivated *comX1*, *comX2* and *comW*  
221 (Figure 4C), so this strain produced only early *com* proteins, except  $\sigma^x$  and ComW, and lacked DprA-

222 GFP foci (Figure 4E). Conversely, to express only the late *com* regulon, we ectopically expressed *comX*  
223 and *comW* (Figure 4D), so this strain produced the late *com* regulon but also the early *com* proteins  $\sigma^X$   
224 and ComW and displayed polar DprA-GFP foci at wildtype levels (Figure 4EF). This led us to consider  
225 that the only proteins whose presence correlated directly with the presence of polar DprA-GFP foci  
226 were thus  $\sigma^X$  and ComW.

227 To first investigate whether ComW played a role in the formation of polar DprA-GFP foci, the  
228 *comW* gene was inactivated in a strain possessing a *rpoD*<sup>A171V</sup> mutation, enabling  $\sigma^X$ -RNA polymerase  
229 interaction and resulting in late *com* regulon expression in the absence of ComW (Tovpeko et al., 2016).  
230 DprA-GFP expressed from the native locus still formed polar foci in this strain at levels comparable to  
231 the wildtype strain (Figure S4A). ComW was thus not required for the formation of DprA-GFP foci. In  
232 light of this, the only remaining candidate whose presence in competent cells correlated directly with  
233 formation of polar DprA-GFP foci was  $\sigma^X$ . Thus, to determine if  $\sigma^X$  alone was necessary and sufficient  
234 to localize DprA-GFP to the cell poles, both *comX* and *dprA-gfp* or *dprA-gfp* alone were expressed in  
235 non-competent *rpoD*<sup>wt</sup> cells. Western blot analysis using  $\alpha$ -SsbB antibodies indicated that the late *com*  
236 regulon was weakly induced when  $\sigma^X$  was ectopically produced in the absence of *comW* (Figure S4B).  
237 Cells producing DprA-GFP alone showed polar DprA-GFP foci in 10% of cells (Figure 5A). In contrast,  
238 DprA-GFP foci were formed in 37% of cells when  $\sigma^X$  was also produced in non-competent cells (Figure  
239 5A). Importantly, induction of competence in both of these strains resulted in similar foci numbers  
240 (Figure S4D). Altogether, this result suggested that  $\sigma^X$  alone was sufficient to stimulate polar foci of  
241 DprA-GFP, highlighting an unexpected role for this early competence  $\sigma$  factor only known to act in  
242 concert with ComW to induce late competence gene transcription.

243

#### 244 **$\sigma^X$ mediates the localization of DprA at the cell pole of competent cells**

245 To investigate how  $\sigma^X$  could be involved in the polar localization of DprA-GFP, we explored how  
246 it localized in competent cells. To this end, we generated a *comX1-gfp* construct at the native *comX1*

247 locus combined with a wildtype *comX2* gene (Figure S5 and Supplementary results). Remarkably,  $\sigma^X$ -  
248 GFP formed bright polar foci 15 minutes after competence induction (Figure 5A), reminiscent of those  
249 formed by DprA-GFP (Figure 1C). A time-course experiment after competence induction showed that  
250  $\sigma^X$ -GFP localized to the cell pole as soon as 4 minutes after CSP addition (Figure 5B), when DprA-GFP  
251 forms weak foci at midcell (Figure 3A). In contrast, a ComW-GFP fusion protein displayed a diffuse  
252 cytoplasmic localization in the majority of competent cells, with only 7% of cells possessing weak foci  
253 at the cell poles (Figure S5A and Supplementary results). Thus,  $\sigma^X$ -GFP localizes to the cell pole without  
254 its partner in transcriptional activation ComW, despite the fact that  $\sigma^X$  is an alternative sigma factor  
255 directing RNA polymerase to specific promoters on the chromosome.

256 Analysis of  $\sigma^X$ -GFP foci distribution showed that they are detected in up to 51% of cells 10  
257 minutes after competence induction, with most cells possessing a single focus (Figure 5BC). The  
258 number of cells with foci decreased steadily after this point (Figure 5BCD), contrasting with polar DprA-  
259 GFP which remained stable over 60 minutes after induction. Importantly,  $\sigma^X$ -GFP continued to form  
260 polar foci in a strain lacking *dprA* (Figure 5E), showing that  $\sigma^X$  does not depend on DprA for its  
261 localization. Together, these results strongly supported the notion that  $\sigma^X$  promotes the targeting and  
262 assembly of DprA-GFP foci at the cell pole. To further explore this hypothesis, we co-expressed DprA-  
263 mTurquoise and  $\sigma^X$ -YFP fluorescent fusions in the same cells and found that 86% of DprA-mTurquoise  
264 foci colocalized with  $\sigma^X$ -YFP foci (Figure 5F). DprA and  $\sigma^X$  are thus present at the same pole of the cell  
265 at the same time and the polar accumulation of DprA molecules in competent cells depends on  $\sigma^X$ .  
266 These results suggested that  $\sigma^X$  could interact with DprA to anchor it to the pole of competent cells.  
267 The potential interaction between  $\sigma^X$  and DprA was tested in live competent pneumococcal cells in  
268 pull-down experiments. To achieve this, we used GFP-TRAP magnetic beads (Chromotek) to purify  $\sigma^X$ -  
269 GFP from competent cells expressing either wildtype DprA or, as a control, the DprA<sup>AR</sup> mutant that did  
270 not accumulate at the cell pole (Figure S1). Results showed that wildtype DprA co-purified with  $\sigma^X$ -GFP  
271 from competent cells extracts, but DprA<sup>AR</sup> did not, revealing that  $\sigma^X$  and DprA interact in live competent

272 pneumococci (Figure 5H). Taken together, these findings reveal that  $\sigma^x$  is responsible for the  
273 accumulation of DprA at the cell pole during competence.

274

### 275 ***Pneumococcal competence induction occurs at the cell pole***

276 We have shown that DprA localization at a single cell pole correlates with the shut-off of  
277 competence (Figure 2). Since DprA interacts directly with ComE~P to mediate competence shut-off  
278 (Mirouze et al., 2013), this raised the question of the subcellular localization of ComD and ComE, which  
279 define a TCS controlling competence regulation. To first explore the localization of ComE in competent  
280 cells, a strain was generated expressing a functional *comE-gfp* fluorescent fusion at the native *comE*  
281 locus (Figure S6 and Supplementary results). In competent cells, ComE-GFP formed patches around  
282 the periphery of the cell, often at the cell pole (Figure 6AB and S7A). A time-lapse experiment showed  
283 that these patches were dynamic, navigating around the cell membrane over time (Movie 2). Next, to  
284 explore the sub-cellular localization of ComD, we generated a strain expressing *gfp-comD* at the native  
285 *comD* locus (Figure S6AC and Supplementary results). The resulting GFP-ComD fusion displayed partial  
286 functionality in competence induction and transformation (Figure S6DE). In contrast to ComE-GFP,  
287 GFP-ComD formed distinct polar foci of varying intensity in 57% of cells (Figure 6AB), a localization  
288 pattern reminiscent of those observed with DprA-GFP and  $\sigma^x$ -GFP (Figures 1 and 5, respectively). Since  
289 GFP-ComD was not fully functional, we also analyzed the localization of a synthetic fluorescent  
290 exogenous CSP peptide (CSP-HF, Figure S6F) in parallel, to track its interaction with ComD at the cell  
291 surface. This fluorescent peptide was found to accumulate at a single cell pole in the majority of  
292 competent, wildtype cells (Figure 6AB). In addition, this accumulation was dependent on the presence  
293 of ComD (Figure 6A), showing that the polar accumulation of the partially functional GFP-ComD fusion  
294 represented a functional subcellular localization during competence. In addition, most cells with  
295 ComD-GFP foci possessed a single focus (Figure 6C), which persisted after the shut-off of competence  
296 (Figure S7B). Altogether, these findings revealed that activation of the positive feedback loop of

297 competence triggered by CSP interaction with ComD to phosphorylate ComE occurs at the cell pole.  
298 Since a single pole is mainly targeted by ComD, this also raised the question of its co-localization with  
299 ComX and DprA.

300

### 301 ***DprA colocalizes with ComD and CSP during competence***

302 To explore the hypothesis that DprA accumulates at the same pole as ComD to mediate  
303 competence shut-off, we performed colocalization analyses of DprA with ComE, ComD or CSP  
304 respectively, in the same competent cells. Although ComE-YFP foci were dynamic and their localization  
305 difficult to analyze, 20% of DprA-mTurquoise foci were nonetheless found to colocalize with ComE-YFP  
306 at the cell pole, showing that these proteins can be found at the same pole in the same cells (**Figure**  
307 **6D**). In contrast, 76% of DprA-mTurquoise foci colocalized with YFP-ComD (**Figure 6E**), showing that  
308 these foci form at the same pole in the majority of cells. In addition, 73% of DprA-GFP foci colocalized  
309 with CSP-HF (**Figure 6F**). Taken together, these results showed that DprA colocalizes strongly with  
310 ComD, generally at one cell pole during pneumococcal competence, further suggesting that the  
311 localization of DprA to this cellular location, mediated by  $\sigma^X$ , facilitates pneumococcal competence  
312 shut-off. The localization of DprA at the cell pole where ComD appears to interact with CSP means that  
313 DprA is present at the time and place that neophosphorylated ComE~P is produced, allowing DprA to  
314 interact with the activated regulator at the cell pole and prevent it from accessing its genomic targets,  
315 facilitating shut-off.

316

### 317 ***Two copies of comX are required for optimal competence shut-off***

318 A distinct hallmark of the single pneumococcal alternative sigma factor  $\sigma^X$  of *S. pneumoniae* is  
319 that it is produced from two distinct and strictly identical genes, at two distinct loci in the  
320 pneumococcal genome, known as *comX1* and *comX2* (Lee and Morrison, 1999). However, inactivation

321 of either of these genes had no effect on the efficiency of transformation as previously reported (Lee  
322 and Morrison, 1999) (Figure 7A), suggesting that the expression of either *comX1* or *comX2* is sufficient  
323 to induce the late *com* regulon to a level ensuring optimal transformation. Having established that  $\sigma^X$   
324 plays a second key role in competence shut-off, we explored whether this role required both *comX*  
325 genes. Inactivation of either *comX* gene not only slightly reduced the peak of late *com* gene expression  
326 but also markedly delayed the rate of competence shut-off (Figure 7B), revealing that reducing the  
327 cellular level of  $\sigma^X$  impacts competence shut-off efficiency, presumably because less  $\sigma^X$  is present to  
328 promote accumulation of DprA at the cell poles. In addition, this unregulated competence shut-off of  
329 single *comX* mutants is accompanied by a reduced growth rate of the cell population, consistent with  
330 an alteration of cell fitness linked to altered competence shut-off (Johnston et al., 2018). In conclusion,  
331 this finding suggests that pneumococci possess two copies of *comX* to optimize DprA-mediated  
332 competence shut-off and maintain the fitness of competent cells.

333

#### 334 ***Pre-competence expression of DprA and $\sigma^X$ antagonizes competence induction***

335 This study has uncovered a new functional role of pneumococcal  $\sigma^X$  in facilitating DprA-  
336 mediated inactivation of ComE-P at the cell pole. To obtain further proof that polar DprA plays a role  
337 in competence shut-off, we reasoned that if  $\sigma^X$  localizes DprA to the cell pole to allow it to interact  
338 with neophosphorylated ComE~P, then early ectopic expression of DprA and  $\sigma^X$  should antagonize  
339 competence induction by interfering with early *com* regulon induction. To test this hypothesis, we  
340 expressed DprA alone or both DprA and  $\sigma^X$  prior to CSP addition to the growth medium (Figure 7C),  
341 referred hereafter as a pre-competence expression. Pre-competence production of DprA alone did not  
342 affect competence induction as shown by monitoring luciferase controlled by an early *com* promoter  
343 (Figure 7D). In these conditions, minimal amounts of DprA accumulated at the cell pole (Figure 5A).  
344 However, pre-competence expression of both DprA and  $\sigma^X$  resulted in a significantly slower induction  
345 of competence (Figure 7E). This suggested that  $\sigma^X$ -mediated pre-localization of DprA to the cell poles

346 in pre-competent cells, as shown in **Figure 4G**, markedly antagonized CSP induction of competence by  
347 allowing DprA to interact with and inactivate neophosphorylated ComE~P. Inactivation of *comW* in this  
348 strain to minimize late *com* gene expression did not alter the profiles (**Figure 7F**), showing that the  
349 observed effect was directly attributable to the role of  $\sigma^x$  in localizing DprA to the cell poles. Altogether,  
350 these findings further prove that in live cells the targeting of pneumococcal DprA to the cell pole,  
351 promoted by  $\sigma^x$  anchored at this cellular location, mediates the timely antagonization of the  
352 competence induction signal.

353

## 354 **Discussion**

### 355 ***The cell pole defines a competence regulation hub in S. pneumoniae***

356 We report here a spatiotemporal analysis of competence regulation in live pneumococcal cells.  
357 We found that the positive regulators ComD, ComE and  $\sigma^x$ , which control the early and late  
358 competence expression waves, and the negative regulator DprA colocalize during competence at one  
359 cell pole to temporally coordinate its development and shut-off. We have shown that the initial stages  
360 of competence induction, relying on the CSP-induced phosphorelay between ComD and ComE, occur  
361 at the cell pole (**Figure 7G**). Most importantly, this study uncovered an unexpected second role for  $\sigma^x$   
362 in competence regulation. In addition to controlling the transcription of the late *com* gene *dprA*,  $\sigma^x$   
363 also mediates the accumulation of DprA molecules mostly at the same pole as ComD, a mechanism  
364 that facilitates competence shut-off.  $\sigma^x$  thus controls both induction of the late *com* regulon and the  
365 shut-off of the early *com* regulon, including thereby its own expression and by consequence that of its  
366 regulon. We found that the  $\sigma^x$ -directed polar localization of DprA in the vicinity of ComD correlates  
367 with its role in competence shut-off. We propose that this targeting favours DprA interaction between  
368 DprA and neosynthesized ComE~P to promote efficient shut-off (**Figure 7H**). Importantly, we  
369 previously reported that DprA-mediated competence shut-off is crucial to the fitness of competent  
370 cells (Johnston et al., 2018; Mirouze et al., 2013), and we revealed here that this vital role of DprA in

371 actively limiting the competence window is orchestrated at the cell pole, which defines a coordination  
372 hub of competence regulation. Unexpectedly, DprA is targeted to this hub by  $\sigma^X$ , describing an  
373 unprecedented role for an alternative sigma factor.

374

### 375 ***The pneumococcal polar competence regulation hub is focused around the histidine kinase ComD***

376 An important finding is the discrete accumulation of the pneumococcal HK ComD at the cell  
377 pole during competence (Figure 6AB). The localization of HKs has not been extensively studied, but  
378 few HKs of two-component signaling systems (TCS) have been found to accumulate at the cell pole.  
379 One well-documented example is the *Escherichia coli* HK CheA, which is involved in chemotaxis. CheA  
380 localizes along with its cognate RR CheY to a single cell pole, forming a chemotactic cluster with a  
381 variety of chemoreceptors. CheY stimulates the production of flagellae at the opposite cell pole, driving  
382 chemotaxis (Baker et al., 2006). Another example is the HK PilS in *Pseudomonas aeruginosa*, which also  
383 accumulates at the cell pole, and along with its cognate cytoplasmic RR PilR, regulates expression of  
384 polar pili (Boyd, 2000). Although ComD tethering at one cell pole is similar to CheA and PilS, major  
385 differences exist between these three TCS system. Firstly, regarding how their RRs localize, ComE  
386 presents a different localization pattern than CheY and PilR, assembling into patches close to the inner  
387 side of the cell membrane and focusing dynamically on the cell pole (Figure 6A and Movie 2). ComE  
388 phosphorylation by ComD promotes its dimerization and switch into a transcriptional activator (Martin  
389 et al., 2013). ComE~P dimers should then leave the cell pole to interact with genomic targets and turn  
390 on early *com* gene expression, producing  $\sigma^X$  and ComW, which then cooperate to turn on late *com* gene  
391 expression. Secondly, the ComDE TCS induces its own expression, generating a positive feedback loop  
392 (Claverys et al., 2006; Martin et al., 2013), and leading to the strong, rapid induction of competence  
393 (Dagkessamanskaia et al., 2004b; Peterson et al., 2004). As found here, this leads to the accumulation  
394 of the regulatory proteins at the cell pole hub. In addition, the ComDE TCS controls a complex, multi-  
395 faceted genetic program involving the altered expression of 17% of the genome (Aprianto et al., 2018b)



396 and is present at a unique cell pole, while the actors of transformation are present at midcell (Bergé  
397 et al., 2013). Finally, it is possible that the polar localization of the competence regulatory hub is  
398 dictated by the very nature of the competence regulation mechanism itself. This localization could be  
399 linked to the transient nature of pneumococcal competence. A spatiotemporally controlled localization  
400 for this process would provide a mechanism to allow initial induction followed by repression, thus  
401 preventing toxicity. It is also possible that the purpose of polar accumulation of  $\sigma^X$  is to limit the  
402 circulating levels of  $\sigma^X$ . Polar accumulation of  $\sigma^X$  may thus protect the cell from a potentially dangerous  
403 hyper-competent state at two levels, firstly by promoting polar DprA accumulation to facilitate shut-  
404 off, and secondly by sequestering  $\sigma^X$  itself to prevent over-induction of the late *com* regulon. Although  
405 the factor localizing  $\sigma^X$  to the cell pole is unknown, it could be considered an anti-sigma factor in this  
406 light. Anti-sigma factors can control alternative sigma factors by interacting directly with them to  
407 sequester them to prevent activity until a specific signal is received (Österberg et al., 2011b). Although  
408 ComD goes to the same pole as  $\sigma^X$ , it is not the anchor directing  $\sigma^X$  to the pole, since DprA (and thus  
409  $\sigma^X$ ) still localizes to the cell pole in the absence of early *com* genes (Figure 4EF).

410

#### 411 ***Two copies of comX ensure optimal fitness of competent cells***

412 This study has uncovered a second role for  $\sigma^X$  in the shut-off of pneumococcal competence,  
413 besides its transcriptional role with ComW, which is to associate with the RNA polymerase and direct  
414 the expression of the late *com* regulon. This second role is independent of ComW. It promotes  
415 accumulation of DprA at the cell pole to facilitate competence shut-off. Pneumococci possess two  
416 identical copies of *comX* at distinct locations within the genome, called *comX1* and *comX2* (Lee and  
417 Morrison, 1999). It has remained unclear why two copies exist, since inactivation of a single copy of  
418 *comX* does not affect transformation efficiency (Figure 7A) (Lee and Morrison, 1999). The finding of a  
419 second role for  $\sigma^X$  in the shut-off of competence suggests a different reason for this duplication, since  
420 both copies of *comX* are required for optimal competence shut-off (Figure 7B). We thus propose that

421 two copies of *comX* are maintained within the genome to optimize the shut-off of competence. Since  
422 unregulated competence is toxic for the cell (Johnston et al., 2018), two copies of *comX* provide a fail-  
423 safe in case of loss or inactivation of one *comX* gene by transformation or spontaneous mutation,  
424 allowing the cell to nonetheless exit the competent state. In light of the second role of  $\sigma^X$  uncovered  
425 here, two copies of *comX* provide a simple yet elegant means for *S. pneumoniae* and close relatives to  
426 ensure they are always equipped to survive competence, allowing cells to reap the potential benefits  
427 of competence without the fitness cost associated with unregulated competence.

428

#### 429 ***Polar accumulation of DprA and ComD and heterogeneity in a post-competence cell population***

430 The  $\sigma^X$ -mediated accumulation of DprA in foci at the cell pole depends on a high concentration  
431 of DprA molecules in the cell, resulting from the  $\sigma^X$ -driven transcription of the *dprA* gene (Figure 2).  
432 This dual feature implies that polar DprA foci are not formed immediately during competence, in line  
433 with our findings (Figure 3). We suggest that this short delay provides the opportunity for ComD to  
434 phosphorylate ComE and induce competence, before DprA arrives at the cell pole to facilitate shut-off.  
435 In addition, the foci formation is dependent on the ability of DprA to dimerize, which alters its both its  
436 role in transformation via interaction with RecA and its role in competence shut-off via interaction with  
437 ComE (Mirouze et al., 2013; Quevillon-Cheruel et al., 2012). However, DprA polar foci formation is  
438 independent of the presence of the transformation pore protein ComEC or the recombinase RecA,  
439 suggesting that the observed foci are not linked to the conserved role of DprA in transformation (Figure  
440 S1). In addition, the loss of polar foci when reducing cellular levels of DprA-GFP correlates with the loss  
441 of competence shut-off, strongly supporting the proposal that DprA accumulation at the cell pole  
442 underpins its negative feedback role in competence regulation (Figure 2 and S2).

443 In a competent population, the presence and intensity of DprA-GFP foci varies from cell to cell  
444 (Figure 3). The same heterogeneity is observed with GFP-ComD foci (Fig. S7). Indeed, at the peak of  
445 CSP-induced competence, a quarter of cells do not present detectable DprA-GFP or GFP-ComD foci

446 and, in the other cells, the foci exhibit different level of brightness (Figures 3 and S7). In addition, foci  
447 are observed in all cell types, meaning that their formation is not determined by a particular stage of  
448 the cell-cycle. This highlights a heterogeneity in the pneumococcal competent cell population.  
449 Furthermore, DprA-GFP and GFP-ComD foci persist in many cells at least 30 minutes after the shut-off  
450 of competence (Figure 3 and S7). It has been shown previously that post-competent cells are unable  
451 to respond to CSP for a period of time after they shut-off competence, a phenomenon known as ‘blind  
452 to CSP’ (Chen and Morrison, 1987; Fox and Hotchkiss, 1957). We suggest that the heterogeneity of  
453 polar DprA and ComD accumulation could play a role in this phenomenon. Polar DprA accumulation in  
454 a majority of cells could prevent cells from responding to CSP by immediately antagonizing  
455 neosynthesized ComE~P, while cells lacking ComD foci may not respond optimally to the competence  
456 signal. Our findings explain the suggestion made previously based on a mathematical model simulating  
457 competence regulation that a high amount of DprA played a role in this phenomenon (Weyder et al.,  
458 2018). This notion is supported by the fact that co-expression of DprA and  $\sigma^X$  prior to CSP addition to  
459 the cell culture antagonized competence development (Figure 7C-F). Furthermore, since not all post-  
460 competent cells possess detectable polar foci of DprA-GFP or GFP-ComD, we suggest that whether  
461 sufficient DprA or ComD has accumulated at the pole of a particular cell should govern whether this  
462 cell can respond to an external CSP signal and is thus receptive to a second wave of competence. This  
463 produces a mixture of competent and non-competent cells, which may maximize the potential survival  
464 of a pneumococcal population.

465

#### 466 ***Concluding remarks***

467 In this study, we have shown that the entire pneumococcal competence regulatory cycle  
468 occurs at a single cell pole. This generates an asymmetry at the poles of a competent cell, which can  
469 be transmitted to future generations and impact the ability to respond to subsequent competence  
470 signals. In addition, we have uncovered a key second role for the competence-dedicated alternative

471 sigma factor  $\sigma^x$  that actively localizes DprA to the polar competence regulatory hub to facilitate  
472 competence shut-off. This regulatory mechanism, involving two proteins with other conserved roles in  
473 competence and transformation respectively, is pivotal to optimal competence shut-off and maintains  
474 the fitness of competent cells. This finding represents the first example of an alternative sigma factor  
475 playing a central role in the extinction of the signal on which its own production depends and broadens  
476 our knowledge of the regulatory roles played by bacterial alternative sigma factors.

477

## 478 **Materials and Methods**

### 479 ***Bacterial strains, transformation and competence***

480 The pneumococcal strains, primers and plasmids used in this study can be found in **Table S3**.  
481 Standard procedures for transformation and growth media were used (Martin et al., 2000). In this  
482 study, cells were rendered unable to spontaneously develop competence either by deletion of the  
483 *comC* gene (*comC0*) (Dagkessamanskaia et al., 2004a) or by replacing the *comC* gene which encodes  
484 CSP1 with an allelic variant encoding CSP2 (Pozzi et al., 1996), since ComD1 is unable to respond to  
485 CSP2 (Johnsborg et al., 2006; Weyder et al., 2018). Both of these alterations render cells unable to  
486 produce CSP. Unless described, pre-competent cultures were prepared by growing cells to an OD<sub>550</sub> of  
487 0.1 in C+Y medium (pH 7) before 10-fold concentration and storage at  $-80^{\circ}\text{C}$  as 100  $\mu\text{L}$  aliquots.  
488 Antibiotic concentrations ( $\mu\text{g mL}^{-1}$ ) used for the selection of *S. pneumoniae* transformants were:  
489 chloramphenicol (Cm), 4.5; erythromycin, 0.05; kanamycin (Kan), 250; spectinomycin (Spc), 100;  
490 streptomycin (Sm), 200; trimethoprim (Trim), 20. For the monitoring of growth and *luc* expression,  
491 precultures were gently thawed and aliquots were inoculated (1 in 100) in luciferin-containing  
492 (Prudhomme and Claverys, 2007) C+Y medium and distributed (300  $\mu\text{L}$  per well) into a 96-well white  
493 microplate with clear bottom. Transformation was carried out as previously described (Martin et al.,  
494 2000). 100  $\mu\text{L}$  aliquots of pre-competent cells were resuspended in 900  $\mu\text{L}$  fresh C+Y medium with 100  
495  $\text{ng mL}^{-1}$  CSP and appropriate IPTG concentrations and incubated at  $37^{\circ}\text{C}$  for 10 min. Transforming DNA

496 was then added to a 100  $\mu$ L aliquot of this culture, followed by incubation at 30°C for 20 min. Cells  
497 were then diluted and plated on 10 mL CAT agar with 5% horse blood and appropriate concentrations  
498 of IPTG before incubation at 37°C for 2 h. A second 10 mL layer of CAT agar with appropriate antibiotic  
499 was added to plates to select transformants, and plates without antibiotic were used as comparison  
500 to calculate transformation efficiency where appropriate. Plates were incubated overnight at 37°C. To  
501 compare transformation efficiencies, transforming DNA was either R304 (Mortier-Barrière et al., 1998,  
502 p.) genomic DNA or a 3,434 bp PCR fragment amplified with primer pair MB117-MB120 as noted (Marie  
503 et al., 2017), both possessing an *rpsL41* point mutation conferring streptomycin resistance. To track  
504 competence profiles, a previously described protocol was used (Prudhomme and Claverys, 2007).  
505 Relative luminescence unit (RLU) and OD values were recorded throughout incubation at 37°C in a  
506 Varioskan luminometer (ThermoFisher). The *comC-luc* and *ssbB-luc* reporter genes were transferred  
507 from R825 or R895 as previously described (Bergé et al., 2002; Chastanet et al., 2001). *CEP<sub>lac</sub>-dprA-gfp*  
508 strains were grown in varying concentrations of IPTG from the beginning of growth, as previously  
509 described (Johnston et al., 2018). Detailed information regarding the construction of new plasmids and  
510 strains can be found in the [Supplementary Information](#).

511

### 512 ***Fluorescence microscopy and image analysis***

513 Pneumococcal precultures grown in C+Y medium at 37°C to an OD<sub>550</sub> of 0.1 were induced with  
514 either CSP (100 ng mL<sup>-1</sup>) or BIP (250 ng mL<sup>-1</sup>) peptide. At indicated times post induction, 1 mL samples  
515 were collected, cooled down by addition of 500 mL cold medium, pelleted (3 min, 3,000 g) and  
516 resuspended in 1 mL C+Y medium. 2  $\mu$ L of this suspension were spotted on a microscope slide  
517 containing a slab of 1.2% C+Y agarose as previously described (Bergé et al., 2013) before imaging.  
518 Unless stated, images were visualized 15 minutes after competence induction, at the peak of  
519 competence gene expression. To generate movies, images were taken of the same fields of vision at  
520 varying time points during incubation at 37°C. Images were captured and processed using the Nis-  
521 Elements AR software (Nikon). Images were analyzed using MicrobeJ, a plug-in of ImageJ (Ducret et

522 al., 2016). Data was analyzed in R and unless stated, represented as focus density maps plotted on the  
523 longitudinal axis of half cells ordered by cell length. Each spot represents the localization of an  
524 individual focus, and spot colour represents focus density at a specific location on the half cell. Cells  
525 with >0 foci shown for each time point. In cells possessing >1 foci, foci were represented adjacently on  
526 cells of the same length.

527

### 528 ***Western blots***

529 To compare the expression profiles of competence proteins after competence induction, time  
530 course Western blots were carried out. Cells were diluted 100-fold in 10 mL C+Y medium pH 7 and  
531 grown to OD 0.1. Where appropriate, cells were induced with CSP (100 ng mL<sup>-1</sup>) or BIP (250 ng mL<sup>-1</sup>)  
532 peptide. At indicated time points, OD<sub>550</sub> measurements were taken and 500 µL of culture was  
533 recovered. Samples were centrifuged (3 min, 3,000 g) and pellets were resuspended in 40 µL of TE 1x  
534 supplemented with 0.01% DOC and 0.02% SDS. Samples were then incubated for 10 minutes at 37°C  
535 before addition of 40 µL 2x sample buffer with 10% β-mercaptoethanol, followed by incubation at 85°C  
536 for 10 minutes. Samples were then normalized compared to the initial OD<sub>550</sub> reading, and loaded onto  
537 SDS-PAGE gels (BIORAD). Samples were migrated for 30 min at 200V, and transferred onto  
538 nitrocellulose membrane using a Transblot Turbo (BIORAD). Membranes were blocked for 1h at room  
539 temperature in 1x TBS with 0.1% Tween20 and 10% milk, before two washes in 1x TBS with 0.1%  
540 Tween20 and probing with primary antibodies (1/10,000 as noted) in 1x TBS with 0.1% Tween20 and  
541 5% milk overnight at 4°C. After a further four washes in 1x TBS with 0.1% Tween20, membranes were  
542 probed with anti-rabbit secondary antibody (1/10,000) for 1h 30 min, followed by another four washes  
543 in 1x TBS with 0.1% Tween20. Membranes were activated using Clarity Max ECL (BIORAD) and  
544 visualized in a ChemiDoc Touch (BIORAD).

545

### 546 ***Co-Immunoprecipitation***

547 Co-immunoprecipitation was done using magnetic GFP-Trap beads as per manufacturer's  
548 instructions (Chromotek). Briefly, cells were inoculated 1/100 in 25 mL of C+Y medium pH 7 and grown  
549 to OD<sub>550</sub> 0.1. Competence was induced by addition of 100 ng mL<sup>-1</sup> CSP, and cells were incubated for 10  
550 min at 37°C. Cultures were mixed with 25 mL cold buffer A (10 mM Tris pH 7.5, 150 mM NaCl) and  
551 centrifuged for 15 min at 5,000 g. Pellets were washed twice with 10 mL cold buffer A, and stored at -  
552 80°C until use. After defrosting, pellets were resuspended in 1 mL buffer B (10 mM Tris pH 7.5, 150  
553 mM NaCl, 0.2mM EDTA, 0.1% TritonX100, 1 M DTT) and incubated for 10 minutes on ice, followed by  
554 10 min at 37°C, and a further 10 min on ice. Samples were then sonicated (2 x 30s with 10s pause) and  
555 centrifuged for 30 min at 4°C and 16,000 g. After normalizing the protein concentrations in the  
556 samples, 20 µg mL<sup>-1</sup> RNase A and 50 µg mL<sup>-1</sup> DNase I were added and samples were tumbled end over  
557 end at 4°C for 30 min. 75 µL of GFP-Trap beads were added to the samples, which were then tumbled  
558 end over end at 4°C for 2 h 30 min. GFP-Trap beads were purified by magnetism and washed twice in  
559 500 µL ice cold dilution buffer (10 mM Tris pH 7.5, 150 mM NaCl, 0.5mM EDTA), before being  
560 resuspended in 2x sample buffer + 10% β-mercaptoethanol and incubated at 95°C for 10 minutes.  
561 Samples were then run on SDS-PAGE gel and Western blots carried out as described above.

562

### 563 **Pre-competence expression of DprA and σ<sup>X</sup>.**

564 Cells (R4500, CEPlac-dprA, dprA::spc, CEPIIR- R4509, R4511, ) were grown to OD<sub>492</sub> 0.2 in 2  
565 mL C+Y medium (pH7.6) with 50 µM IPTG. After centrifugation for 5 minutes at 5,000 rpm, cells were  
566 resuspended in 1 mL C+Y medium and stored at -80°C in 100 µL aliquots until required. Aliquots were  
567 resuspended in 900 µL fresh C+Y medium (pH7.6) and diluted 1/10 in a 96-ell plate in C+Y medium (pH  
568 7.6) with luciferin and 50 µM IPTG to induce DprA expression. After 25 minutes, BIP (250ng µL<sup>-1</sup>) was  
569 added where noted to induce σ<sup>X</sup>. 20 minutes later, CSP (100ng µL<sup>-1</sup>) was added to induce competence  
570 for 20 minutes. Luminometric and photometric reading were taken every 2 minutes during this time  
571 to report induction of *comC-luc*.

572

## 573 **Acknowledgements**

574 We thank Nathalie Campo and Mathieu Bergé for critical reading of the manuscript, and the  
575 rest of the Polard lab for helpful discussions. We thank Jérôme Rech for help creating Movies. We  
576 thank Jan-Willem Veening for kind donation of the pMK111 plasmid. This work was funded by the  
577 Agence Nationale de la Recherche (Grants ANR-10-BLAN-1331 and ANR-13-BSV8-0022).

578

## 579 **Author Contributions**

580 Conceptualization, C. J., M. P., P. P.; Methodology, C. J., P. P.; Investigation, C. J., A. L. S., M. B.,  
581 M. P., D. D. L.; Writing – Original draft, C. J.; Writing – Review and editing, C. J., P. P.; Funding  
582 acquisition, P. P.

583

## 584 **References**

- 585 Aggarwal, S.D., Eutsey, R., West-Roberts, J., Domenech, A., Xu, W., Abdullah, I.T., Mitchell, A.P.,  
586 Veening, J.-W., Yesilkaya, H., Hiller, N.L., 2018. Function of BriC peptide in the pneumococcal  
587 competence and virulence portfolio. *PLoS Pathog.* 14, e1007328.  
588 <https://doi.org/10.1371/journal.ppat.1007328>
- 589 Akerley, B.J., Rubin, E.J., Camilli, A., Lampe, D.J., Robertson, H.M., Mekalanos, J.J., 1998. Systematic  
590 identification of essential genes by in vitro mariner mutagenesis. *Proc. Natl. Acad. Sci. U. S. A.*  
591 95, 8927–8932. <https://doi.org/10.1073/pnas.95.15.8927>
- 592 Alloing, G., Martin, B., Granadel, C., Claverys, J.P., 1998. Development of competence in  
593 *Streptococcus pneumoniae*: pheromone autoinduction and control of quorum sensing by the  
594 oligopeptide permease. *Mol. Microbiol.* 29, 75–83. <https://doi.org/10.1046/j.1365-2958.1998.00904.x>
- 596 Aprianto, R., Slager, J., Holsappel, S., Veening, J.-W., 2018a. High-resolution analysis of the  
597 pneumococcal transcriptome under a wide range of infection-relevant conditions. *Nucleic  
598 Acids Res.* 46, 9990–10006. <https://doi.org/10.1093/nar/gky750>
- 599 Aprianto, R., Slager, J., Holsappel, S., Veening, J.-W., 2018b. High-resolution analysis of the  
600 pneumococcal transcriptome under a wide range of infection-relevant conditions. *Nucleic  
601 Acids Res.* 46, 9990–10006. <https://doi.org/10.1093/nar/gky750>
- 602 Baker, M.D., Wolanin, P.M., Stock, J.B., 2006. Signal transduction in bacterial chemotaxis. *BioEssays  
603 News Rev. Mol. Cell. Dev. Biol.* 28, 9–22. <https://doi.org/10.1002/bies.20343>
- 604 Bergé, M., Moscoso, M., Prudhomme, M., Martin, B., Claverys, J.-P., 2002. Uptake of transforming  
605 DNA in Gram-positive bacteria: a view from *Streptococcus pneumoniae*. *Mol. Microbiol.* 45,  
606 411–421.
- 607 Bergé, M.J., Kamgoué, A., Martin, B., Polard, P., Campo, N., Claverys, J.-P., 2013. Midcell recruitment  
608 of the DNA uptake and virulence nuclease, EndA, for pneumococcal transformation. *PLoS  
609 Pathog.* 9, e1003596. <https://doi.org/10.1371/journal.ppat.1003596>
- 610 Bergé, M.J., Mercy, C., Mortier-Barrière, I., VanNieuwenhze, M.S., Brun, Y.V., Grangeasse, C., Polard,  
611 P., Campo, N., 2017. A programmed cell division delay preserves genome integrity during



- 612 natural genetic transformation in *Streptococcus pneumoniae*. *Nat. Commun.* 8.  
613 <https://doi.org/10.1038/s41467-017-01716-9>
- 614 Boyd, J.M., 2000. Localization of the histidine kinase PilS to the poles of *Pseudomonas aeruginosa*  
615 and identification of a localization domain. *Mol. Microbiol.* 36, 153–162.  
616 <https://doi.org/10.1046/j.1365-2958.2000.01836.x>
- 617 Caymaris, S., Bootsma, H.J., Martin, B., Hermans, P.W.M., Prudhomme, M., Claverys, J.-P., 2010. The  
618 global nutritional regulator CodY is an essential protein in the human pathogen  
619 *Streptococcus pneumoniae*. *Mol. Microbiol.* 78, 344–360.
- 620 Chastanet, A., Prudhomme, M., Claverys, J.P., Msadek, T., 2001. Regulation of *Streptococcus*  
621 *pneumoniae* *clp* genes and their role in competence development and stress survival. *J.*  
622 *Bacteriol.* 183, 7295–7307. <https://doi.org/10.1128/JB.183.24.7295-7307.2001>
- 623 Chen, J.D., Morrison, D.A., 1987. Modulation of competence for genetic transformation in  
624 *Streptococcus pneumoniae*. *J. Gen. Microbiol.* 133, 1959–1967.  
625 <https://doi.org/10.1099/00221287-133-7-1959>
- 626 Claverys, J.-P., Håvarstein, L.S., 2007. Cannibalism and fratricide: mechanisms and raisons d’être. *Nat.*  
627 *Rev. Microbiol.* 5, 219–229. <https://doi.org/10.1038/nrmicro1613>
- 628 Claverys, J.-P., Prudhomme, M., Martin, B., 2006. Induction of competence regulons as a general  
629 response to stress in gram-positive bacteria. *Annu. Rev. Microbiol.* 60, 451–475.  
630 <https://doi.org/10.1146/annurev.micro.60.080805.142139>
- 631 Dagkessamanskaia, A., Moscoso, M., Hénard, V., Guiral, S., Overweg, K., Reuter, M., Martin, B., Wells,  
632 J., Claverys, J.-P., 2004a. Interconnection of competence, stress and CiaR regulons in  
633 *Streptococcus pneumoniae*: competence triggers stationary phase autolysis of *ciaR* mutant  
634 cells. *Mol. Microbiol.* 51, 1071–1086.
- 635 Dagkessamanskaia, A., Moscoso, M., Hénard, V., Guiral, S., Overweg, K., Reuter, M., Martin, B., Wells,  
636 J., Claverys, J.-P., 2004b. Interconnection of competence, stress and CiaR regulons in  
637 *Streptococcus pneumoniae*: competence triggers stationary phase autolysis of *ciaR* mutant  
638 cells. *Mol. Microbiol.* 51, 1071–1086.
- 639 Ducret, A., Quardokus, E.M., Brun, Y.V., 2016. MicrobeJ, a tool for high throughput bacterial cell  
640 detection and quantitative analysis. *Nat. Microbiol.* 1, 16077.  
641 <https://doi.org/10.1038/nrmicrobiol.2016.77>
- 642 Fox, M.S., Hotchkiss, R.D., 1957. Initiation of bacterial transformation. *Nature* 179, 1322–1325.  
643 <https://doi.org/10.1038/1791322a0>
- 644 Guiral, S., Mitchell, T.J., Martin, B., Claverys, J.-P., 2005. Competence-programmed predation of  
645 noncompetent cells in the human pathogen *Streptococcus pneumoniae*: genetic  
646 requirements. *Proc. Natl. Acad. Sci. U. S. A.* 102, 8710–8715.  
647 <https://doi.org/10.1073/pnas.0500879102>
- 648 Håvarstein, L.S., Coomaraswamy, G., Morrison, D.A., 1995. An unmodified heptadecapeptide  
649 pheromone induces competence for genetic transformation in *Streptococcus pneumoniae*.  
650 *Proc. Natl. Acad. Sci. U. S. A.* 92, 11140–11144. <https://doi.org/10.1073/pnas.92.24.11140>
- 651 Hui, F.M., Zhou, L., Morrison, D.A., 1995. Competence for genetic transformation in *Streptococcus*  
652 *pneumoniae*: organization of a regulatory locus with homology to two lactococcal A  
653 secretion genes. *Gene* 153, 25–31. [https://doi.org/10.1016/0378-1119\(94\)00841-f](https://doi.org/10.1016/0378-1119(94)00841-f)
- 654 Johnsborg, O., Kristiansen, P.E., Blomqvist, T., Håvarstein, L.S., 2006. A hydrophobic patch in the  
655 competence-stimulating Peptide, a pneumococcal competence pheromone, is essential for  
656 specificity and biological activity. *J. Bacteriol.* 188, 1744–1749.  
657 <https://doi.org/10.1128/JB.188.5.1744-1749.2006>
- 658 Johnston, C., Hauser, C., Hermans, P.W.M., Martin, B., Polard, P., Bootsma, H.J., Claverys, J.-P., 2016.  
659 Fine-tuning of choline metabolism is important for pneumococcal colonization. *Mol.*  
660 *Microbiol.* 100, 972–988. <https://doi.org/10.1111/mmi.13360>
- 661 Johnston, C., Martin, B., Fichant, G., Polard, P., Claverys, J.-P., 2014. Bacterial transformation:  
662 distribution, shared mechanisms and divergent control. *Nat. Rev. Microbiol.* 12, 181–196.  
663 <https://doi.org/10.1038/nrmicro3199>

- 664 Johnston, C., Mortier-Barriere, I., Khemici, V., Polard, P., 2018. Fine-tuning cellular levels of DprA  
665 ensures transformant fitness in the human pathogen *Streptococcus pneumoniae*. *Mol.*  
666 *Microbiol.* 109, 663–675. <https://doi.org/10.1111/mmi.14068>
- 667 Kazmierczak, M.J., Wiedmann, M., Boor, K.J., 2005. Alternative sigma factors and their roles in  
668 bacterial virulence. *Microbiol. Mol. Biol. Rev. MMBR* 69, 527–543.  
669 <https://doi.org/10.1128/MMBR.69.4.527-543.2005>
- 670 Kloosterman, T.G., Hendriksen, W.T., Bijlsma, J.J.E., Bootsma, H.J., van Hijum, S.A.F.T., Kok, J.,  
671 Hermans, P.W.M., Kuipers, O.P., 2006. Regulation of glutamine and glutamate metabolism by  
672 GlnR and GlnA in *Streptococcus pneumoniae*. *J. Biol. Chem.* 281, 25097–25109.  
673 <https://doi.org/10.1074/jbc.M601661200>
- 674 Lee, M.S., Morrison, D.A., 1999. Identification of a new regulator in *Streptococcus pneumoniae*  
675 linking quorum sensing to competence for genetic transformation. *J. Bacteriol.* 181, 5004–  
676 5016.
- 677 Lin, J., Lau, G.W., 2019. DprA-dependent exit from the competent state regulates multifaceted  
678 *Streptococcus pneumoniae* virulence. *Infect. Immun.* <https://doi.org/10.1128/IAI.00349-19>
- 679 Lin, J., Zhu, L., Lau, G.W., 2016. Disentangling competence for genetic transformation and virulence in  
680 *Streptococcus pneumoniae*. *Curr. Genet.* 62, 97–103. [https://doi.org/10.1007/s00294-015-](https://doi.org/10.1007/s00294-015-0520-z)  
681 0520-z
- 682 Luo, P., Li, H., Morrison, D.A., 2004. Identification of ComW as a new component in the regulation of  
683 genetic transformation in *Streptococcus pneumoniae*. *Mol. Microbiol.* 54, 172–183.  
684 <https://doi.org/10.1111/j.1365-2958.2004.04254.x>
- 685 Marie, L., Rapisarda, C., Morales, V., Bergé, M., Perry, T., Soulet, A.-L., Gruget, C., Remaut, H.,  
686 Fronzes, R., Polard, P., 2017. Bacterial RadA is a DnaB-type helicase interacting with RecA to  
687 promote bidirectional D-loop extension. *Nat. Commun.* 8, 15638.  
688 <https://doi.org/10.1038/ncomms15638>
- 689 Martin, B., García, P., Castanié, M.P., Claverys, J.P., 1995. The *recA* gene of *Streptococcus*  
690 *pneumoniae* is part of a competence-induced operon and controls lysogenic induction. *Mol.*  
691 *Microbiol.* 15, 367–379.
- 692 Martin, B., Prats, H., Claverys, J.P., 1985. Cloning of the *hexA* mismatch-repair gene of *Streptococcus*  
693 *pneumoniae* and identification of the product. *Gene* 34, 293–303.  
694 [https://doi.org/10.1016/0378-1119\(85\)90138-6](https://doi.org/10.1016/0378-1119(85)90138-6)
- 695 Martin, B., Prudhomme, M., Alloing, G., Granadel, C., Claverys, J.P., 2000. Cross-regulation of  
696 competence pheromone production and export in the early control of transformation in  
697 *Streptococcus pneumoniae*. *Mol. Microbiol.* 38, 867–878.
- 698 Martin, B., Soulet, A.-L., Mirouze, N., Prudhomme, M., Mortier-Barrière, I., Granadel, C., Noirot-Gros,  
699 M.-F., Noirot, P., Polard, P., Claverys, J.-P., 2013. ComE/ComE~P interplay dictates activation  
700 or extinction status of pneumococcal X-state (competence). *Mol. Microbiol.* 87, 394–411.  
701 <https://doi.org/10.1111/mmi.12104>
- 702 Mirouze, N., Bergé, M.A., Soulet, A.-L., Mortier-Barrière, I., Quentin, Y., Fichant, G., Granadel, C.,  
703 Noirot-Gros, M.-F., Noirot, P., Polard, P., Martin, B., Claverys, J.-P., 2013. Direct involvement  
704 of DprA, the transformation-dedicated RecA loader, in the shut-off of pneumococcal  
705 competence. *Proc. Natl. Acad. Sci. U. S. A.* 110, E1035-1044.  
706 <https://doi.org/10.1073/pnas.1219868110>
- 707 Mortier-Barrière, I., Campo, N., Bergé, M.A., Prudhomme, M., Polard, P., 2019. Natural Genetic  
708 Transformation: A Direct Route to Easy Insertion of Chimeric Genes into the Pneumococcal  
709 Chromosome. *Methods Mol. Biol.* Clifton NJ 1968, 63–78. [https://doi.org/10.1007/978-1-](https://doi.org/10.1007/978-1-4939-9199-0_6)  
710 4939-9199-0\_6
- 711 Mortier-Barrière, I., de Saizieu, A., Claverys, J.P., Martin, B., 1998. Competence-specific induction of  
712 *recA* is required for full recombination proficiency during transformation in *Streptococcus*  
713 *pneumoniae*. *Mol. Microbiol.* 27, 159–170.
- 714 Mortier-Barrière, I., Velten, M., Dupaigne, P., Mirouze, N., Piétremont, O., McGovern, S., Fichant, G.,  
715 Martin, B., Noirot, P., Le Cam, E., Polard, P., Claverys, J.-P., 2007. A key presynaptic role in

- 716 transformation for a widespread bacterial protein: DprA conveys incoming ssDNA to RecA.  
717 Cell 130, 824–836. <https://doi.org/10.1016/j.cell.2007.07.038>
- 718 Österberg, S., del Peso-Santos, T., Shingler, V., 2011a. Regulation of alternative sigma factor use.  
719 Annu. Rev. Microbiol. 65, 37–55. <https://doi.org/10.1146/annurev.micro.112408.134219>
- 720 Österberg, S., del Peso-Santos, T., Shingler, V., 2011b. Regulation of alternative sigma factor use.  
721 Annu. Rev. Microbiol. 65, 37–55. <https://doi.org/10.1146/annurev.micro.112408.134219>
- 722 Pestova, E.V., Morrison, D.A., 1998. Isolation and characterization of three *Streptococcus*  
723 *pneumoniae* transformation-specific loci by use of a lacZ reporter insertion vector. J.  
724 Bacteriol. 180, 2701–2710.
- 725 Peterson, S.N., Sung, C.K., Cline, R., Desai, B.V., Snesrud, E.C., Luo, P., Walling, J., Li, H., Mintz, M.,  
726 Tsegaye, G., Burr, P.C., Do, Y., Ahn, S., Gilbert, J., Fleischmann, R.D., Morrison, D.A., 2004.  
727 Identification of competence pheromone responsive genes in *Streptococcus pneumoniae* by  
728 use of DNA microarrays. Mol. Microbiol. 51, 1051–1070.
- 729 Pozzi, G., Masala, L., Iannelli, F., Manganello, R., Havarstein, L.S., Piccoli, L., Simon, D., Morrison, D.A.,  
730 1996. Competence for genetic transformation in encapsulated strains of *Streptococcus*  
731 *pneumoniae*: two allelic variants of the peptide pheromone. J. Bacteriol. 178, 6087–6090.  
732 <https://doi.org/10.1128/jb.178.20.6087-6090.1996>
- 733 Prudhomme, M., Attaiech, L., Sanchez, G., Martin, B., Claverys, J.-P., 2006. Antibiotic stress induces  
734 genetic transformability in the human pathogen *Streptococcus pneumoniae*. Science 313,  
735 89–92. <https://doi.org/10.1126/science.1127912>
- 736 Prudhomme, M., Claverys, J.-P., 2007. There will be a light: the use of luc transcriptional fusions in  
737 living pneumococcal cells., in: The Molecular Biology of Streptococci. R. Hakenbeck, and G.S.  
738 Chatwal, pp. 519–524.
- 739 Quevillon-Cheruel, S., Campo, N., Mirouze, N., Mortier-Barrière, I., Brooks, M.A., Boudes, M., Durand,  
740 D., Soulet, A.-L., Lisboa, J., Noirot, P., Martin, B., van Tilbeurgh, H., Noirot-Gros, M.-F.,  
741 Claverys, J.-P., Polard, P., 2012. Structure-function analysis of pneumococcal DprA protein  
742 reveals that dimerization is crucial for loading RecA recombinase onto DNA during  
743 transformation. Proc. Natl. Acad. Sci. U. S. A. 109, E2466-2475.  
744 <https://doi.org/10.1073/pnas.1205638109>
- 745 Salles, C., Créancier, L., Claverys, J.P., Méjean, V., 1992. The high level streptomycin resistance gene  
746 from *Streptococcus pneumoniae* is a homologue of the ribosomal protein S12 gene from  
747 *Escherichia coli*. Nucleic Acids Res. 20, 6103. <https://doi.org/10.1093/nar/20.22.6103>
- 748 Sanchez-Puelles, J.M., Ronda, C., Garcia, J.L., Garcia, P., Lopez, R., Garcia, E., 1986. Searching for  
749 autolysin functions. Characterization of a pneumococcal mutant deleted in the *lytA* gene.  
750 Eur. J. Biochem. 158, 289–293. <https://doi.org/10.1111/j.1432-1033.1986.tb09749.x>
- 751 Slager, J., Aprianto, R., Veening, J.-W., 2019. Refining the Pneumococcal Competence Regulon by  
752 RNA Sequencing. J. Bacteriol. 201. <https://doi.org/10.1128/JB.00780-18>
- 753 Slager, J., Kjos, M., Attaiech, L., Veening, J.-W., 2014. Antibiotic-induced replication stress triggers  
754 bacterial competence by increasing gene dosage near the origin. Cell 157, 395–406.  
755 <https://doi.org/10.1016/j.cell.2014.01.068>
- 756 Sung, C.K., Li, H., Claverys, J.P., Morrison, D.A., 2001. An rpsL cassette, janus, for gene replacement  
757 through negative selection in *Streptococcus pneumoniae*. Appl. Environ. Microbiol. 67, 5190–  
758 5196. <https://doi.org/10.1128/AEM.67.11.5190-5196.2001>
- 759 Sung, C.K., Morrison, D.A., 2005. Two distinct functions of ComW in stabilization and activation of the  
760 alternative sigma factor ComX in *Streptococcus pneumoniae*. J. Bacteriol. 187, 3052–3061.  
761 <https://doi.org/10.1128/JB.187.9.3052-3061.2005>
- 762 Tovpeko, Y., Bai, J., Morrison, D.A., 2016. Competence for Genetic Transformation in *Streptococcus*  
763 *pneumoniae*: Mutations in  $\sigma$ A Bypass the ComW Requirement for Late Gene Expression. J.  
764 Bacteriol. 198, 2370–2378. <https://doi.org/10.1128/JB.00354-16>
- 765 van Raaphorst, R., Kjos, M., Veening, J.-W., 2017. Chromosome segregation drives division site  
766 selection in *Streptococcus pneumoniae*. Proc. Natl. Acad. Sci. U. S. A. 114, E5959–E5968.  
767 <https://doi.org/10.1073/pnas.1620608114>

768 Vidal, J.E., Howery, K.E., Ludewick, H.P., Nava, P., Klugman, K.P., 2013. Quorum-sensing systems  
769 LuxS/autoinducer 2 and Com regulate *Streptococcus pneumoniae* biofilms in a bioreactor  
770 with living cultures of human respiratory cells. *Infect. Immun.* 81, 1341–1353.  
771 <https://doi.org/10.1128/IAI.01096-12>  
772 Weng, L., Piotrowski, A., Morrison, D.A., 2013. Exit from competence for genetic transformation in  
773 *Streptococcus pneumoniae* is regulated at multiple levels. *PLoS One* 8, e64197.  
774 <https://doi.org/10.1371/journal.pone.0064197>  
775 Weyder, M., Prudhomme, M., Bergé, M., Polard, P., Fichant, G., 2018. Dynamic Modeling of  
776 *Streptococcus pneumoniae* Competence Provides Regulatory Mechanistic Insights Into Its  
777 Tight Temporal Regulation. *Front. Microbiol.* 9, 1637.  
778 <https://doi.org/10.3389/fmicb.2018.01637>  
779 Zhu, L., Lin, J., Kuang, Z., Vidal, J.E., Lau, G.W., 2015. Deletion analysis of *Streptococcus pneumoniae*  
780 late competence genes distinguishes virulence determinants that are dependent or  
781 independent of competence induction. *Mol. Microbiol.* 97, 151–165.  
782 <https://doi.org/10.1111/mmi.13016>  
783

784

## 785 **Figure Legends**

### 786 **Figure 1: DprA: Localization and roles in competence and transformation.**

787 (A) (1) Pre-CSP is exported and matured by the ComAB transporter, and then phosphorylates the  
788 histidine kinase ComD. (2) ComD transphosphorylates ComE, which then stimulates the expression of  
789 17 early *com* genes, including two copies of *comX*. (3) These encode an alternative sigma factor  $\sigma^X$ ,  
790 which controls late *com* genes including *dprA*. (4) DprA dimers load RecA onto ssDNA to mediate  
791 transformation and interact with ComE~P to shut-off competence. (5) Transforming DNA is  
792 internalized in single strand form and is protected from degradation by DprA and RecA (6), which then  
793 mediate transformation (7). Orange arrows, early *com* promoters; purple arrows, late *com* promoters.  
794 (B) Western blot tracking cellular levels of DprA-GFP after competence induction in strain R3728.  $\alpha$ -  
795 DprA antibody used. (C) Sample fluorescence microscopy images of R3728 strain producing DprA-GFP  
796 15 minutes after competence induction. Scale bars, 1  $\mu$ m. (D) Schematic representation of focus  
797 density maps with half cells represented as vertical lines in ascending size order and localization of foci  
798 represented along the length axis of each half cell. Black half-cells represent those presented, and grey  
799 those not presented. (E) DprA-GFP accumulates at the cell poles during competence. 1290 cells and  
800 1128 foci analyzed (F) Sample immunofluorescence microscopy images of a strain producing wildtype

801 DprA (R1502; wildtype) and a strain lacking DprA (R2018; *dprA*<sup>-</sup>) fixed 15 minutes after competence  
802 induction. Scale bars, 1  $\mu$ m.

803

804 **Figure 2: Reducing cellular DprA-GFP levels results in loss of polar accumulation and competence**  
805 **shut-off**

806 (A) Focus density maps of DprA-GFP foci at different cellular levels during competence. *CEP<sub>lac</sub>-dprA-gfp*  
807 from strain R4262. Cellular DprA-GFP levels were controlled by growing cells in a gradient of IPTG. 1.5  
808  $\mu$ M IPTG, 11267 cells and 791 foci analyzed; 3  $\mu$ M IPTG, 10623 cells and 748 foci analyzed; 6  $\mu$ M IPTG,  
809 10603 cells and 743 foci analyzed; 12.5  $\mu$ M IPTG, 6985 cells and 1010 foci analyzed; 25  $\mu$ M IPTG, 2945  
810 cells and 1345 foci analyzed; 50  $\mu$ M IPTG, 3678 cells and 1964 foci analyzed. Sample microscopy images  
811 of strain R4262 in varying IPTG concentrations. Scale bars, 1  $\mu$ m. (B) Reducing cellular levels of DprA-  
812 GFP reduces the number of cells with foci. Error bars represent triplicate repeats. (C) Reducing cellular  
813 levels of DprA-GFP results specifically in loss of polar foci. Error bars represent triplicate repeats.

814

815 **Figure 3: Analysis of the cellular localization of DprA-GFP**

816 (A) DprA-GFP foci persist at the cell pole after competence shut-off Data at different time points after  
817 CSP addition represented as in [Figure 1E](#). 4 minutes, 8336 cells and 1383 foci analyzed; 6 minutes, 2871  
818 cells and 1674 foci analyzed; 10 minutes, 2614 cells and 1502 foci analyzed; 15 minutes, 1290 cells and  
819 1128 foci analyzed; 20 minutes, 2110 cells and 1900 foci analyzed; 30 minutes, 789 cells and 831 foci  
820 analyzed; 60 minutes, 842 cells and 839 foci analyzed. Sample microscopy images of strain R3728 at  
821 varying times after competence induction. Scale bars, 1  $\mu$ m. (B) Most competent cells possess a single  
822 polar focus of DprA-GFP. Error bars represent triplicate repeats. (C) Most cells possess polar DprA-GFP  
823 foci. Along the length of a cell of arbitrary length 1, polar foci are found between positions 0-0.15 and  
824 0.85-1, midcell foci are found between 0.35 and 0.65, and anything in between is localized as betwixt.  
825 Error bars represent triplicate repeats.

826



827 **Figure 4: Polar accumulation of DprA-GFP appears to depend on late *com* regulon expression**

828 (A) Sample fluorescence microscopy images of strain R4060 producing DprA-GFP 15 minutes after  
829 induction with BIP or BIP and CSP. Scale bars, 1  $\mu\text{m}$ . (B) Competence induction is required for optimal  
830 accumulation of DprA-GFP at the cell poles. Focus density maps as in Figure 1E. BIP+, 7845 cells and  
831 790 foci analyzed; BIP+ CSP+, 2707 cells and 1478 foci analyzed. (C) Genetic context strain R4107  
832 expressing *dprA-gfp* and only the late *com* regulon.  $P_{BIP}$  and  $P_X$  as in panel A,  $P_E$  represents early *com*  
833 promoter controlled by ComE. Light blue circle, ComW; light green oval, RNA polymerase; purple  
834 hexagon,  $\sigma^X$ . (D) Genetic context of strain R4140 expressing *CEP<sub>R</sub>-dprA-gfp* and only the early *com*  
835 regulon.  $P_{BIP}$  as in panel A,  $P_E$  as in panel D. (E) Sample fluorescence microscopy images of strains  
836 producing DprA-GFP with only late (R4107) or only early (R4140) *com* operons 15 minutes after  
837 competence induction. Scale bars, 2  $\mu\text{m}$ . (F) Induction of the late *com* regulon is required for  
838 accumulation of DprA-GFP at the cell poles. Focus density maps as in Figure 1E. 1988 cells and 1824  
839 foci analyzed. (G) Focus density maps produced as in Figure 1E from images where DprA-GFP was  
840 produced outside of competence in presence or absence of  $\sigma^X$ . DprA-GFP alone, 7845 cells and 790  
841 foci analyzed; DprA-GFP +  $\sigma^X$ , 3545 cells and 1355 foci analyzed. Strains used: DprA-GFP alone, R4060;  
842 DprA-GFP and  $\sigma^X$ , R4489.

843

844 **Figure 5:  $\sigma^X$ -GFP interacts directly with DprA at the cell pole during competence**

845 (A) Sample fluorescence microscopy images of strain R4451 producing  $\sigma^X$ -GFP from *comX1* and  
846 wildtype  $\sigma^X$  from *comX2* 15 minutes after competence induction. Scale bars, 1  $\mu\text{m}$ . (B)  $\sigma^X$ -GFP  
847 accumulates at the cell poles during competence. Focus density maps presented as in Figure 1E. 4  
848 minutes, 7544 cells and 489 foci analyzed; 6 minutes, 5442 cells and 1711 foci analyzed; 10 minutes,  
849 4358 cells and 2691 foci analyzed; 15 minutes, 3746 cells and 2144 foci analyzed; 20 minutes, 4211  
850 cells and 1754 foci analyzed; 30 minutes, 4695 cells and 1920 foci analyzed; 60 minutes, 5713 cells and  
851 1016 foci analyzed. (C) Most cells have a single  $\sigma^X$ -GFP focus. Data from the time-course experiment  
852 presented in panel B showing the number of foci per cell at each time point. Error bars represent

853 triplicate repeats. (D) DprA-GFP foci persist in cells longer than  $\sigma^X$ -GFP foci. Comparison of cells with  
854 foci at different timepoints from timecourse experiments. DprA-GFP from **Figure 3A**,  $\sigma^X$ -GFP from panel  
855 B. Error bars represent triplicate repeats. (E) Accumulation of  $\sigma^X$  at the cell poles does not depend on  
856 DprA. Sample microscopy images of a *comX1-gfp, dprA<sup>-</sup>* strain (R4469). Focus density maps generated  
857 from cells visualized 15 minutes after competence induction presented as in **Figure 1E**. 1104 cells and  
858 638 foci analyzed. (F)  $\sigma^X$  and DprA colocalize at the cell pole. Colocalization of  $\sigma^X$ -YFP and DprA-  
859 mTurquoise in R4473 cells visualized 15 minutes after competence induction. 7460 cells and 3504  
860 DprA-mTurquoise foci analyzed. Scale bars, 1  $\mu$ m. (G) DprA is copurified with  $\sigma^X$ -GFP while DprA<sup>AR</sup> is  
861 not. Western blot of pull-down experiment carried out on strains producing  $\sigma^X$ -GFP and either DprA  
862 (R4451) or DprA<sup>AR</sup> (R4514) 10 minutes after competence induction. WCE, whole cell extract; FT1, flow  
863 through; E, eluate.

864

865 **Figure 6: The main actors of competence induction and shut-off colocalize at the cell pole**

866 (A) Sample fluorescence microscopy images of cells producing ComE-GFP (R4010), GFP-ComD (R3914)  
867 or wildtype cells (R1501) and *comD<sup>-</sup>* cells (R1745) exposed to CSP-HF. Scale bars, 1  $\mu$ m. GFP-ComD,  
868 1933 cells and 1397 foci; CSP-HF, 2105 cells and 2121 foci. (B) Focus density maps of cells producing  
869 GFP-ComD (R3914) and wildtype (R1501) cells exposed to CSP-HF 15 minutes after competence  
870 induction. Data presented as in **Figure 1E**. GFP-ComD, 1933 cells and 1397 foci analyzed; CSP-HF, 2105  
871 cells and 2121 foci analyzed. (C) Number of foci present in cells possessing foci of different fluorescent  
872 fusions 15 minutes after competence induction. Data taken from panel B except for DprA-GFP, taken  
873 from **Figure 3**. (D) DprA-mTurquoise and ComE-YFP colocalization in competent R4176 cells visualized  
874 by fluorescence microscopy 15 minutes after competence induction. 3143 cells and 2126 DprA-  
875 mTurquoise foci analyzed. Scale bars, 1  $\mu$ m. (E) DprA-mTurquoise and YFP-ComD colocalization in  
876 competent R4111 cells visualized by fluorescence microscopy 15 minutes after competence induction.  
877 2857 cells and 1335 DprA-mTurquoise foci analyzed. Scale bars, 1  $\mu$ m. (F) DprA-GFP and CSP-HF

878 colocalization in competent R4062 cells visualized by fluorescence microscopy 15 minutes after  
879 competence induction. 7588 cells and 3663 DprA-mTurquoise foci analyzed. Scale bars, 1  $\mu$ m.

880

881 **Figure 7: Pre-competence expression of DprA and  $\sigma^x$  antagonizes competence induction**

882 (A) Inactivation of *comX1* or *comX2* does not impact transformation efficiency. Error bars represent  
883 triplicate repeats. (B) Inactivation of *comX1* or *comX2* delays the shut-off of competence. Data is  
884 plotted as Relative light units, corrected by optical density (RLU/OD) against OD. Error bars represent  
885 triplicate repeats. (C) Visual representation of experiment exploring the impact of pre-competence  
886 expression of DprA and  $\sigma^x$  on induction. (D) BIP induction of cells lacking *CEP<sub>lac</sub>-comX* does not alter  
887 competence induction. Cells possessing *comC-luc* and *CEP<sub>lac</sub>-dprA* (R4511) were treated as described  
888 in Panel C. Error bars represent triplicate repeats. (E) Production of  $\sigma^x$  and DprA prior to competence  
889 induction antagonizes competence. Cells possessing *comC-luc* and *CEP<sub>lac</sub>-dprA* and *CEP<sub>lac</sub>-comX*  
890 (R4500) were treated as in panel C. Error bars represent triplicate repeats. (F) Inactivation of *comW*  
891 does not alter the antagonization of competence induction mediated by early DprA and  $\sigma^x$  production.  
892 Cells possessing *comC-luc*, *CEP<sub>lac</sub>-dprA*, *CEP<sub>lac</sub>-comX* and  *$\Delta$ comW::trim* (R4509) were treated as in panel  
893 C. Error bars represent triplicate repeats. (G) Polar competence induction in *Streptococcus*  
894 *pneumoniae*. (1) Extracellular CSP interacts with ComD at the cell poles, prompting ComD  
895 autophosphorylation. (2) Patches of ComE navigate around the cell membrane. (3) Polar ComD  
896 phosphorylates ComE. (4) Active ComE~P dimers leave the cell poles to interact with genomic targets,  
897 inducing the early *com* regulon and (5) launching an autocatalytic feedback loop. (6) Among the early  
898 *com* genes, *comX1*, *comX2* and *comW* produce  $\sigma^x$  and its activator ComW, which induce the late *com*  
899 regulon, including DprA. Orange arrows, early *com* promoters; purple arrows, late *com* promoters. C,  
900 *comC*; D, *comD*; E, *comE*; X1/2, *comX1/comX2*; W, *comW*; RNAP, RNA polymerase. (H) Polar shut-off of  
901 pneumococcal competence. (1)  $\sigma^x$  interacts directly with DprA, promoting accumulation of DprA at the  
902 cell pole, generating a polar DprA 'cloud' in competent cells, near ComD (2). (3) Polar DprA interacts  
903 directly with neosynthesized ComE~P, preventing the regulator from accessing its genomic targets. (4)



904 Unphosphorylated ComE interacts with early com promoters, acting as a repressor to prevent  
905 induction (Martin et al., 2013), promoting extinction of the competence signal, resulting in  
906 competence shut-off (5).

907

## 908 **Supplementary Figure Legends**

### 909 **Figure S1: Validation of DprA-GFP activity**

910 (A) Linear representation of DprA-GFP with the limits of Pfam02481 (in gray) and structural domains  
911 indicated. Interfaces of dimerization and interaction with RecA and ComE are indicated and represent  
912 the regions within which the majority of point mutations affecting interaction were identified (Mirouze  
913 et al., 2013; Quevillon-Cheruel et al., 2012). The GFP protein is separated from DprA by a linker, as  
914 described previously (Bergé et al., 2013). (B) Western blot tracking cellular levels of DprA-GFP after  
915 induction as shown from strains R4045 and R3728.  $\alpha$ -DprA antibody used. Samples at each time point  
916 corrected by OD to render direct comparison of cellular levels possible. Full gel shows no degradation  
917 of DprA-GFP throughout growth. (C) DprA-GFP is active in transformation. Comparing transformation  
918 efficiency of wildtype (R1501), *drpA*<sup>-</sup> (R2018) and *dprA-gfp* (R3728) strains. R304 chromosomal DNA,  
919 conferring streptomycin resistance via *rpsL41* point mutation (Salles et al., 1992), used to transform at  
920 1, 10 and 100 ng mL<sup>-1</sup>. Error bars represent triplicate repeats. (D) DprA-GFP is partially active in  
921 competence shut-off. Comparing the competence profiles of wildtype (R1502), *drpA*<sup>-</sup> (R2018) and  
922 *dprA-gfp* (R3743) strains after CSP addition (100 ng mL<sup>-1</sup>, t = 40 min). Luminometric and photometric  
923 readings of *ssbB-luc* transcriptional reporter fusion taken every 5 minutes. Full lines represent  
924 competence induction (RLU/OD) and dotted lines represent growth (OD). Error bars represent  
925 triplicate repeats. (E) Dimerization of DprA is necessary for accumulation of DprA-GFP at the cell poles.  
926 Western blot tracking cellular levels of DprA-GFP after competence induction in strain R4046.  $\alpha$ -DprA  
927 antibody used. Samples at each time point corrected by OD to render direct comparison of cellular  
928 levels possible. In contrast to DprA-GFP (Figure 1B), the levels of DprA<sup>AR</sup>-GFP continue to increase over

929 the time period of the experiment as competence is not shut-off in this DprA<sup>AR</sup> strains (Quevillon-  
930 Cheruel et al., 2012). Sample fluorescence microscopy images of R4046 strain producing DprA<sup>AR</sup>-GFP  
931 15 minutes after competence induction. Scale bars, 1  $\mu$ m. 1124 cells and 5 foci analyzed. (F) Disrupting  
932 the ability of DprA to interact with RecA (*dprA<sup>QNO</sup>*) does not impact the polar accumulation of DprA.  
933 Strain R4047 (*comCO, dprA<sup>QNO</sup>-gfp*) observed 15 minutes after competence induction. Data presented  
934 as in **Figure 1E**. 767 cells and 612 foci analyzed. Sample microscopy images of strain R4047 15 minutes  
935 after competence induction. Scale bars, 1  $\mu$ m. (G) Inactivating the *comEC* transformation pore gene to  
936 prevent uptake of exogenous DNA does not impact the polar accumulation of DprA. Strain R4082  
937 (*dprA-gfp, comEC*) observed 15 minutes after competence induction. Data presented as in **Figure 1E**,  
938 632 cells and 778 foci analyzed. Sample microscopy images of strain R4082 15 minutes after  
939 competence induction. Scale bars, 1  $\mu$ m. (H) Inactivation the recombinase gene *recA* to prevent  
940 homologous recombination does not impact the polar accumulation of DprA. Strain R4061 (*dprA-gfp,*  
941 *recA*) observed 15 minutes after competence induction. Data presented as in **Figure 1E**, 1393 cells and  
942 996 foci analyzed. Sample microscopy images of strain R4061 15 minutes after competence induction.  
943 Scale bars, 1  $\mu$ m. (I) DprA-GFP foci remain stable over time after competence induction. DprA-GFP foci  
944 tracked by time-lapse fluorescence microscopy every 5 minutes from 10 to 30 minutes after  
945 competence induction in strain R3728. Images analyzed by MicrobeJ (Ducret et al., 2016). Each series  
946 of linked spots represents a single focus tracked over time, localized in an averaged pneumococcal cell.  
947 (J) Sample time-lapse fluorescence microscopy images of strain R3728 used to generate panel H.

948

#### 949 **Figure S2: Validation of *CEP<sub>lac</sub>-dprA-gfp* activity**

950 (A) Western blots comparing cellular levels of DprA (R3833) and DprA-GFP (R4262) produced from the  
951 *CEP<sub>lac</sub>* platform in cells lacking native *dprA* in varying concentrations of IPTG.  $\alpha$ -DprA antibodies used.  
952 Samples at each IPTG concentration corrected by OD to render direct comparison of cellular levels  
953 possible. Cellular levels of DprA-GFP estimated from Western blots compared to purified DprA as  
954 previously described (Johnston et al., 2018). (B) Transformation efficiency of a *CEP<sub>lac</sub>-dprA-gfp, dprA*

955 strain (R4262) in an IPTG concentration gradient. R304 chromosomal DNA (50 ng mL<sup>-1</sup>), conferring  
956 streptomycin resistance via *rpsL41* point mutation (Salles et al., 1992), used to transform. Error bars  
957 represent triplicate repeats. (C) Competence profiles of a R4262 strain possessing *CEP<sub>lac</sub>-dprA-gfp* and  
958 *ssbB-luc* in an IPTG concentration gradient. Appropriate IPTG concentration present from the  
959 beginning of the culture. Competence induced by addition of CSP at t=0, when OD = ~0.05. Plots  
960 representative of triplicate repeats.

961

962 **Figure S3: Validation of strains expressing *CEP<sub>R</sub>-dprA-gfp* and the late *com* regulon alone**

963 (A) Western blots tracking cellular levels of DprA-GFP in R4060 (*CEP<sub>R</sub>-dprA-gfp dprA<sup>-</sup>*), R4088 (*dprA-gfp*  
964 *CEP<sub>R</sub>-comXW*) and R4140 (*CEP<sub>R</sub>-dprA-gfp comX12<sup>-</sup> comW<sup>+</sup>*) strains after induction with BIP. Either  $\alpha$ -  
965 GFP or  $\alpha$ -DprA antibodies used. Samples at each timepoint corrected by OD to render direct  
966 comparison of cellular levels possible. (B) Comparing transformation efficiencies of isogenic strains  
967 impaired for competence auto-induction. R1501 (“wildtype”), R2018 (*dprA<sup>-</sup>*), R4060 (*CEP<sub>R</sub>-dprA-gfp*  
968 *dprA<sup>-</sup>*) and R4088 (*dprA-gfp CEP<sub>R</sub>-comXW*) strains after induction with either CSP, BIP or both, as  
969 shown. *rpsL41* PCR fragment, conferring streptomycin via point mutation (Salles et al., 1992), used to  
970 transform at 50 ng mL<sup>-1</sup>. Error bars represent triplicate repeats. (C) Exploring the competence profile  
971 of a strain ectopically expressing DprA-GFP under the control of BIP. R1501 (wildtype), R2018 (*dprA<sup>-</sup>*)  
972 and R4060 (*CEP<sub>R</sub>-dprA-gfp dprA<sup>-</sup>*) strains. Experiment carried out as as in **Figure S1D**. Error bars  
973 represent triplicate repeats. (D) Exploring the competence profile of a strain ectopically expressing  $\sigma^x$   
974 and ComW under the control of BIP and DprA-GFP from its native promoter. R1501 (wildtype), R2018  
975 (*dprA<sup>-</sup>*) and R4088 (*CEP<sub>R</sub>-comXW, dprA-gfp, cbpD::cat*) strains. Experiment carried out as as in **Figure**  
976 **S1D**. Error bars represent triplicate repeats.

977

978 **Figure S4:  $\sigma^x$  is necessary and sufficient to mediate accumulation of DprA at the cell poles.**

979 (A) DprA-GFP accumulates at the cell poles in the absence of ComW. Localization of DprA-GFP in R4168  
980 strain (*dprA-gfp*, *rpoD<sup>A171V</sup>*, *comW*) 15 minutes after competence induction. Sample fluorescence  
981 microscopy images shown. Scale bars, 1  $\mu$ m. Focus density maps presented as in **Figure 3B**. 3592 cells  
982 and 2101 foci analyzed. (B) Production of  $\sigma^X$  outside of competence promotes accumulation of DprA-  
983 GFP at the cell poles. Sample fluorescence microscopy images of cells producing DprA-GFP (R4060) or  
984 DprA-GFP and  $\sigma^X$  (R4489) outside of competence. Focus density maps presented as in **Figure 3B**. DprA-  
985 GFP +  $\sigma^X$ , 3545 cells and 1355 foci analyzed. *CEP<sub>R</sub>-dprA-gfp* induced by BIP, 7845 cells and 790 foci  
986 analyzed; *CEP<sub>R</sub>-dprA-gfp* induced by BIP and CSP, 5889 cells and 2254 foci analyzed; *CEP<sub>R</sub>-dprA-gfp*,  
987 *CEPIIR-comX* induced by BIP, 3545 cells and 1355 foci analyzed; *CEP<sub>R</sub>-dprA-gfp*, *CEPIIR-comX* induced  
988 by BIP and CSP, 6085 cells and 2458 foci analyzed. Scale bars, 1  $\mu$ m. (C) Data from analysis of images  
989 in panel A split into cells with 0, 1 or 2 foci. (D) Western blot comparing expression of late *com* regulon  
990 by tracking cellular levels of SsbB in R1501 (wildtype) and R4509 (*CEPII<sub>R</sub>-comX*, *comW*) strains. R1501  
991 induced by CSP at t=0 and R4509 induced by BIP. Samples at each time point corrected by OD to render  
992 direct comparison of cellular levels possible. Relative SsbB levels measured by quantifying SsbB bands  
993 and normalizing to the band of SsbB expression 10 minute after BIP addition to R4509 as 1.  $\alpha$ - $\sigma^X$  and  
994  $\alpha$ -SsbB antibodies used as shown.

995

#### 996 **Figure S5: Validation of *comW* and *comX* fluorescent fusions**

997 (A) ComW-GFP is diffuse within the cell cytoplasm. Localization of ComW-GFP in R4513 strain (*comW*-  
998 *gfp*, *comW*<sup>+</sup>) 15 minutes after competence induction. Sample fluorescence microscopy images shown.  
999 Scale bars, 2  $\mu$ M. Focus density maps presented as in **Figure 1E**. 9705 cells and 701 foci analyzed. (B)  
1000 Western blots showing expression of ComW, ComW-GFP, SsbA and SsbB in response to CSP addition  
1001 to either R1501 (wildtype) or R4513 (*comW-gfp*, *comW*<sup>+</sup>) cells.  $\alpha$ -ComW or  $\alpha$ -SsbB antibodies used as  
1002 shown.  $\alpha$ -SsbB antibodies recognize both SsbA and SsbB. Samples at each time point corrected by OD  
1003 to render direct comparison of cellular levels possible. (C) Western blots tracking cellular levels of  $\sigma^X$ ,  
1004  $\sigma^X$ -GFP and DprA after competence induction in R4451 (*comX1-gfp*) and R4461 (*comX1-gfp*, *comX2*)

1005 strains.  $\alpha$ - $\sigma^X$  and  $\alpha$ -DprA antibodies used as shown. Samples at each time point corrected by OD to  
1006 render direct comparison of cellular levels possible. (D)  $\sigma^X$ -GFP is partially active in competence  
1007 induction. Comparing the competence profiles of R1502 (*ssbB-luc*), R4471 (*comX1-gfp*, *ssbB-luc*) and  
1008 R4465 (*comX1-gfp*, *comX2*, *ssbB-luc*) strains. Data presented as described in **Figure S1D**. Error bars  
1009 represent triplicate repeats. (E) Comparing transformation efficiencies of R1501 (wildtype), R4451  
1010 (*comX1-gfp*) and R4461 (*comX1-gfp*, *comX2*) strains. *rpsL41* PCR fragment, conferring streptomycin  
1011 via point mutation (Salles et al., 1992), used to transform at 50 ng mL<sup>-1</sup>. Error bars represent triplicate  
1012 repeats. (F)  $\sigma^X$ -GFP is active in the shut-off of competence. Comparison of competence profiles of  
1013 R1502 (*ssbB-luc*), R4471 (*comX1-gfp*, *ssbB-luc*) and R4466 (*comX1* *ssbB-luc*) strains as described in  
1014 **Figure S1D**. Comparison of data from panel E and **Figure 7B**. Error bars represent triplicate repeats.

1015

#### 1016 **Figure S6: Validation of ComE-GFP, GFP-ComD and CSP-HF**

1017 (A) ComE-GFP and GFP-ComD are produced stably after induction of competence. Western blots  
1018 tracking cellular levels of ComE-GFP (R4010) and GFP-ComD (R3914) after induction of competence.  
1019  $\alpha$ -ComD and  $\alpha$ -ComE antibodies used. Samples corrected by OD to render direct comparison of cellular  
1020 levels possible. (B) Western blot comparing ComE-GFP (R4010) and ComE (R1501) 15 minutes after  
1021 competence induction, showing that ComE-GFP is not degraded. (C) Western blot comparing GFP-  
1022 ComD (R3914) and ComD (R1501) 15 minutes after competence induction, showing that GFP-ComD is  
1023 not degraded. (D) Comparison of competence induction profiles of R1502 (*ssbB-luc*), R4087 (*comE-gfp*,  
1024 *ssbB-luc*) and R3915 (*gfp-comD*, *ssbB-luc*) strains as described in **Figure S1D**. Error bars represent  
1025 triplicate repeats. (E) Comparison of transformation efficiencies at varying time points after  
1026 competence induction in R1501 (wildtype), R4010 (*comE-gfp*) and R3914 (*gfp-comD*) strains. R304  
1027 chromosomal DNA (50 ng mL<sup>-1</sup>), conferring streptomycin resistance via *rpsL41* point mutation (Salles  
1028 et al., 1992), used to transform at indicated time points. (F) Comparison of competence induction  
1029 profiles of concentration gradients of CSP and CSP-HF. Strain used, R1501 (*ssbB-luc*) Luminometric

1030 readings taken every 30 seconds during the experiment. (G) ComD localizes to the cell pole in the  
1031 absence of the late *com* regulon. Focus density maps of strain R4916 (*gfp-comD*, *comX1*<sup>-</sup>, *comX2*<sup>-</sup>,  
1032 *comW*<sup>-</sup>) 15 minutes after competence induction presented as in **Figure 1E**. Sample microscopy images  
1033 of strain R4196 15 minutes after competence induction. Scale bars, 1  $\mu$ m.

1034

1035 **Figure S7: Time-course experiments tracking the localization of ComE-GFP, GFP-ComD and CSP-HF**  
1036 **after competence induction**

1037 (A) ComE-GFP forms patches around the cell membrane in competent cells. Sample microscopy images  
1038 of strain R4010 at varying time points after competence induction. Scale bars, 1  $\mu$ m. (B) GFP-ComD  
1039 accumulates at the cell poles in competent cells. Focus density maps of GFP-ComD (R3914) in time-  
1040 course experiment after competence induction. Data presented as in **Figure 1E**. 4 minutes, 18772 cells  
1041 and 832 foci analyzed; 6 minutes, 2115 cells and 770 foci analyzed; 10 minutes, 1581 cells and 944 foci  
1042 analyzed; 15 minutes, 1933 cells and 1397 foci analyzed; 20 minutes, 2549 cells and 2311 foci analyzed;  
1043 30 minutes, 2526 cells and 2299 foci analyzed; 60 minutes, 3358 cells and 2428 foci analyzed. Sample  
1044 microscopy images of strain R3914 at varying time points after competence induction. Scale bars, 1  
1045  $\mu$ m. (C) CSP-HF accumulates at the cell poles in competent cells. Focus density maps of CSP-HF in time-  
1046 course experiment after competence induction of R1501 strain. Data presented as in **Figure 1E**. 4  
1047 minutes, 2928 cells and 1671 foci analyzed; 6 minutes, 2581 cells and 2283 foci analyzed; 10 minutes,  
1048 2391 cells and 2795 foci analyzed; 15 minutes, 2105 cells and 2121 foci analyzed; 20 minutes, 1279  
1049 cells and 2515 foci analyzed; 30 minutes, 1997 cells and 2052 foci analyzed; 60 minutes, 993 cells and  
1050 735 foci analyzed. Sample microscopy images of strain R1501 at varying time points after competence  
1051 induction. Scale bars, 1  $\mu$ m.

1052

1053 **Supplementary Materials and Methods**

1054 ***Strain construction***

1055           Here we describe how the new plasmids and mutants used in this study were generated.  
1056   Previously published constructs and mutants were simply transferred from published strains by  
1057   transformation with appropriate selection. The pMB42 plasmid was generated by amplifying *gfp* with  
1058   primer pair OMB4-OMB5 and the 5' end of *dprA* with primer pair dprA22-dprA23. The resulting DNA  
1059   fragments were digested by *XhoI/HindIII* and *XhoI/EcoRI* respectively, and both ligated into a pUC59-  
1060   derived plasmid pAO-0 plasmid digested with *EcoRI* and *HindIII*. This generated a plasmid which, when  
1061   transformed into pneumococci, generated a strain possessing *dprA-gfp* at the native locus, as well as  
1062   a *spc* resistance cassette. A strain containing *dprA-gfp* at the native *dprA* locus (R3728) was  
1063   constructed by transforming R1501 (*comC0*) with the pMB42 plasmid and selecting for spectinomycin  
1064   resistance. To generate the pMB42-dprA<sup>AR</sup> and pMB42-dprA<sup>QNG</sup> plasmids, the same primer pair was  
1065   used to amplify *dprA* from strains R2585 and R2830, and the plasmids were generated in the same  
1066   manner. These plasmids were transformed into R1501 (*comC0*) to generate R4046 and R4047  
1067   respectively. To generate pMB42-mKate2, mKate2 was amplified by PCR using the pMK111 plasmid as  
1068   a template with primer pair CJ431-CJ432. pMB42 plasmid and the resulting PCR product were digested  
1069   with *XhoI* and *HindIII* restriction enzymes, and ligated together to generate pMB42-mKate2. pMB42-  
1070   mTurquoise was generated in the same manner using R4011 as template and the CJ454-CJ455 primer  
1071   pair. These plasmids were transformed into R1501 (*comC0*) to generate R4048 and R4062 respectively.  
1072           To generate a strain possessing *comX1-gfp*, a DNA fragment comprising the *gfp* gene flanked  
1073   by 5' and 3' regions of the *comX1* gene was generated by splicing overlap extension (SOE) PCR. The  
1074   primer pairs used to generate the 5' *comX1* region, *gfp* and the 3' *comX1* region were respectively  
1075   CJ643-CJ644, CJ645-CJ646 and CJ647-CJ648, using R3728 genomic DNA as a template. The resulting  
1076   PCR fragments were fused by SOE PCR and transformed into R1501 (*comC0*) without selection. 100  
1077   clones were screened by PCR with the primer pair CJ643-CJ648 to identify *comX1-gfp* clones, one of  
1078   which was named R4451. To generate a strain possessing *comE-gfp*, the same method was used with  
1079   the primer pairs CJ379-CJ380, CJ381-CJ382, CJ383-CJ384 to generate the individual fragments and  
1080   CJ379-CJ384 to generate the SOE fragment. To generate a strain possessing *comW-gfp*, the same



1081 method was used with the primer pairs CJ508-CJ514, CJ515-CJ516, CJ517-CJ513 to generate the  
1082 individual fragments and CJ508-CJ513 to generate the SOE fragment. To generate *gfp-comD*, PCR  
1083 fragments of the regions up and downstream of the *comD* start codon and *gfp*, by PCR on R3728 with  
1084 primer pairs MP216-MP217, MP220-MP221 and MP218-MP218 respectively. SOE PCR on these three  
1085 fragments using primer pair MP216-MP221 generated *gfp-comD* with flanking sequences. This  
1086 fragment was transformed into R1036 (*rpsL1, ΔcomC::kan-rpsL*), which contains a Janus cassette in the  
1087 *comCDE* locus (Sung et al., 2001), with streptomycin selection, to replace the Janus cassette as  
1088 previously described (Sung et al., 2001). To generate the plasmid pCEP<sub>R</sub>-dprA-gfp, *dprA-gfp* was  
1089 amplified from R3728 using primer pair CJ410-CJ411, possessing restriction sites *NcoI* and *BamHI*  
1090 respectively. This fragment and the pCEP<sub>R</sub>-luc (Johnston et al., 2016) plasmid were digested and ligated  
1091 together to generate pCEP<sub>R</sub>-dprA-gfp. This plasmid was transformed into R1501 (*comC0*) with  
1092 kanamycin selection to generate R4045. For each fluorescent fusion, a LEGSG linker was placed  
1093 between *gfp* and the gene as previously described (Bergé et al., 2013).

1094 To inactivate the 18 *cin* boxes of each late *com* operon individually, two PCR fragments were  
1095 generated for each with homology to the 5' and 3' regions flanking the *cin* boxes using primers DDL48  
1096 to DDL121 (See [Table S3](#) for details), with the entire 8 bp *cin* box (TACGATAA, (Lee and Morrison, 1999)  
1097 replaced with a *BamHI* site and two flanking base pairs as shown (AGGATCCT). In some cases, the first  
1098 and last bases were altered so as not to match those of a particular *cin* box sequence ([Table S3](#)). SOE  
1099 PCR using the flanking primers for each *cin* box (eg. DDL64 and DDL67 for *dprA<sup>cinbox-</sup>*) generated a single  
1100 fragment of ~2,500 bp with the mutated *cin* box flanked by ~1,250 bp of homology on either side.  
1101 These SOE PCR fragments were individually transformed into R4431 (*comC0, radA-gfp, dprA-mKate2*),  
1102 and 20 clones were picked for each transformation. The *radA-gfp* construct was present in this strain  
1103 as part of another study and will not be discussed here, but explains why the *dprA-mKate2* fusion was  
1104 used here. The targeted *cin* box sites were amplified by PCR on 10 clones in each case, using the same  
1105 primers as for the SOE PCR, then digested by *BamHI* and screened on agarose gel (1%). Mutated clones



1106 were identified as those whose amplified PCR fragment was digested by *Bam*HI, indicating insertion of  
1107 the transforming DNA fragment and resulting *cin* box mutation.

1108 To generate the pCEP<sub>lac</sub>-dprA-gfp plasmid, *P<sub>syn</sub>-lacI-P<sub>lac</sub>-dprA* and *P<sub>syn</sub>-kan-treR* fragments were  
1109 amplified from the CEP platform in strain R3833 using primer pairs AmiF1-CJ496 and CJ499-CJ500,  
1110 while *gfp* was amplified from R3728 using primer pair CJ497-CJ498. These three fragments were used  
1111 to generate a large *CEP<sub>lac</sub>-dprA-gfp* SOE PCR fragment using primer pair AmiF1-CJ500, possessing the  
1112 entire *CEP<sub>lac</sub>-dprA-gfp* platform as well as flanking sequence, which was then transformed into R1501  
1113 (*comC0*) with kanamycin selection to generate R4261.

1114 To delete *comW* and replace it with a trimethoprim resistance cassette, the sequences 5' and  
1115 3' of the *comW* gene were amplified using primer pairs CJ559-CJ560 and CJ563-CJ564, and the *trim*  
1116 resistance cassette was amplified from strain TK108 (Kloosterman et al., 2006) by primer pair CJ561-  
1117 CJ562. These three fragments were fused by SOE PCR with the primer pair CJ559-CJ564 and the  
1118 resulting fragment was transformed into R1501 (*comC0*) to generate R4575 (*comC0, ΔcomW::trim*). To  
1119 delete the entire *comCDE* operon and replace it with a trimethoprim resistance cassette, the  
1120 sequences 5' and 3' of the *comW* gene were amplified using primer pairs CJ385-CJ470 and CJ473-  
1121 CJ384, and the *trim* resistance cassette was amplified from strain TK108 (Kloosterman et al., 2006) by  
1122 primer pair CJ471-CJ472. These three fragments were fused by SOE PCR with primer pair CJ385-CJ384  
1123 and the resulting fragment was transformed into R1501 (*comC0*) to generate R4574 (*ΔcomCDE::trim*).

1124

### 1125 ***Pre-competence expression of DprA and σ<sup>X</sup>***

1126 To test whether pre-competence expression of DprA and σ<sup>X</sup> antagonized competence induction, we  
1127 generated strains which possessed an ectopic platform expressing *dprA* in response to IPTG (*CEP<sub>lac</sub>-*  
1128 *dprA*) (Johnston et al., 2018) alone or in addition to an ectopic platform expressing *comX* in response  
1129 to the BIP peptide (*CEP<sub>II<sub>R</sub></sub>-comX*). We showed previously that ectopic expression of *dprA-gfp* and *comX*  
1130 resulted in localization of DprA-GFP to the cell poles, unlike ectopic expression of *dprA-gfp* alone  
1131 (Figure 5A). In the present experiment, expression of *dprA* was induced throughout growth by the

1132 presence of 50 $\mu$ M IPTG in the culture medium. Cells were grown to OD<sub>550</sub> 0.08, and were either  
1133 exposed to BIP to induce *comX*, or not. Twenty minutes after this, CSP was added to the culture to  
1134 induce competence, and the induction of the early *com* regulon was tracked by measuring activity of  
1135 a *comC-luc* transcriptional reporter fusion (Bergé et al., 2002) every 2 minutes for 20 minutes to  
1136 observe initial competence induction.

1137

## 1138 **Supplementary Results**

### 1139 ***Assessing the activity of DprA-GFP***

1140 To determine the functionality of a DprA-GFP fluorescent fusion, we compared the transformation and  
1141 competence shut-off of this strain to wildtype and *dprA*<sup>-</sup> controls. DprA-GFP displayed near wildtype  
1142 activity in transformation and competence shut-off measured using an *ssbB-luc* transcriptional  
1143 reporter fusion (Figure S1CD) as previously described (Prudhomme and Claverys, 2007).

1144

### 1145 ***Construction and validation of strains expressing only early or late com regulons***

1146 To express only the late *com* regulon, the *comX* and *comW* genes were placed under the  
1147 control of BIP at the CEP expression platform (Weyder et al., 2018) in a strain possessing *dprA-gfp* at  
1148 the native locus, with the *comCDE* operon deleted to prevent any expression of early *com* operons  
1149 (Figure 4C). In addition, the *cbpD* gene was inactivated to compensate for the absence of the early *com*  
1150 gene *comM* (Bergé et al., 2017; Guiral et al., 2005). Addition of BIP to this strain resulted in induction  
1151 of the late *com* regulon in the absence of the autocatalytic feedback loop generated by the early *com*  
1152 regulon. This strain transformed equally well upon CSP or BIP addition, showing that late *com* regulon  
1153 expression is sufficient for transformation (Figure S3B). However, since the catalytic feedback loop of  
1154 the early *com* genes was removed, little to no shut-off of late *com* gene expression was observed  
1155 (Figure S3D). To express only the early *com* regulon, both copies of *comX*, along with *comW*, were

1156 inactivated in a strain possessing *CEP<sub>R</sub>-dprA-gfp* (Figure 4D). Addition of both BIP and CSP to this strain  
1157 resulted in the induction of the early *com* regulon and the production of DprA-GFP. Since no other late  
1158 *com* genes were expressed in this strain, the strain could not transform and the induction profile of  
1159 *ssbB-luc* could not be tracked.

1160

#### 1161 ***Validation of successful cin box inactivation***

1162 Successful *cin box* inactivation was confirmed in three individual *cin box* mutants with known  
1163 transformation deficits, and each strain displayed the expected transformation deficit (Table S1),  
1164 showing that as expected, full *cin box* mutation successfully abrogated  $\sigma^X$ -mediated expression, and  
1165 allowing extrapolation to the 18 *cin box* mutants generated.

1166

#### 1167 ***Assessing the activity of $\sigma^X$ -GFP***

1168 In the absence of *comX2*, the second gene producing  $\sigma^X$ ,  $\sigma^X$ -GFP induced the late *com* regulon poorly  
1169 and was thus weakly transformable (Figure S5CDE). As a result, a strain possessing *comX1-gfp* and  
1170 *comX2* was used to determine the localization of  $\sigma^X$ -GFP. This strain developed competence at a level  
1171 only slightly lower than wild-type and transformed at wildtype levels (Figure S5DE). In addition,  
1172 comparing competence profiles of *comX1<sup>-</sup>* and *comX1-gfp* showed that a strain producing  $\sigma^X$  from  
1173 *comX2* and  $\sigma^X$ -GFP from *comX1*, shut-off competence more efficiently than a strain producing only  $\sigma^X$   
1174 from *comX2* (Figure S5F), suggesting that although  $\sigma^X$ -GFP is weakly active for competence induction,  
1175 it is functional for its role in competence shut-off at the cell poles.

1176

#### 1177 ***Assessing the activity of ComE-GFP, GFP-ComD and CSP-HF***

1178 ComE-GFP was fully functional in competence induction and resulting transformation efficiency, while  
1179 GFP-ComD displayed a delayed, weaker induction of competence, mimicked by transformation  
1180 efficiency (Figure S6DE). Induction of competence with CSP-HF displayed a slight delay compared to  
1181 wildtype CSP, and although induction levels were similar at high concentrations, lower concentrations  
1182 of CSP-HF induced competence less than wildtype (Figure S6F). Nonetheless, the full or partial  
1183 functionality of these fusion proteins allowed exploration of their localization in competent cells

1184

1185 **Table S3 refs:** (Akerley et al., 1998; Caymaris et al., 2010; Marie et al., 2017; Martin et al., 1995, 1985;  
1186 Mortier-Barrière et al., 2019; Sanchez-Puelles et al., 1986; van Raaphorst et al., 2017)

1187

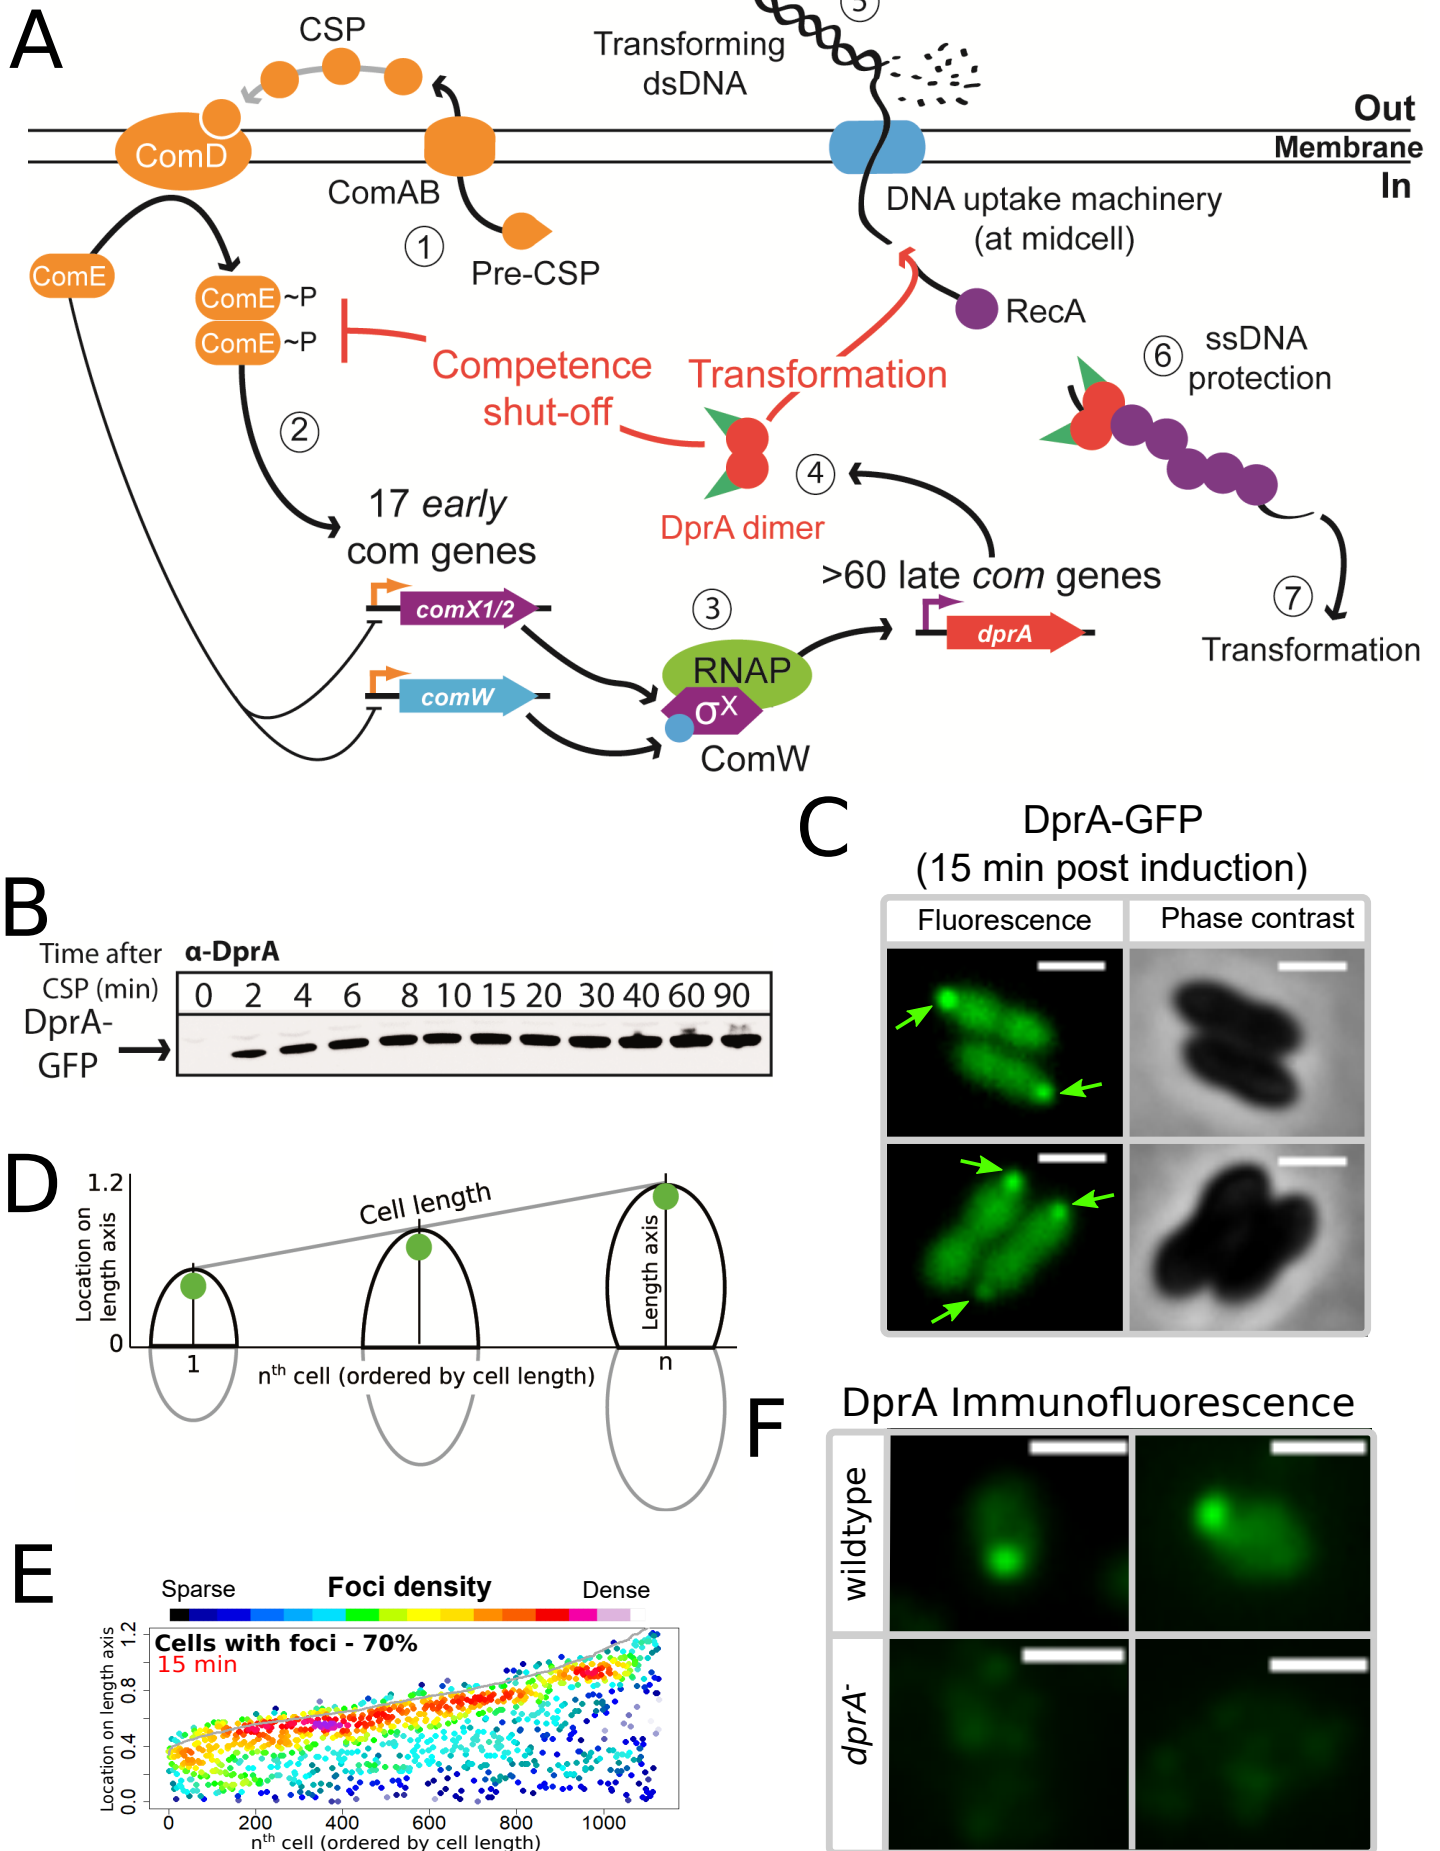

Figure 1

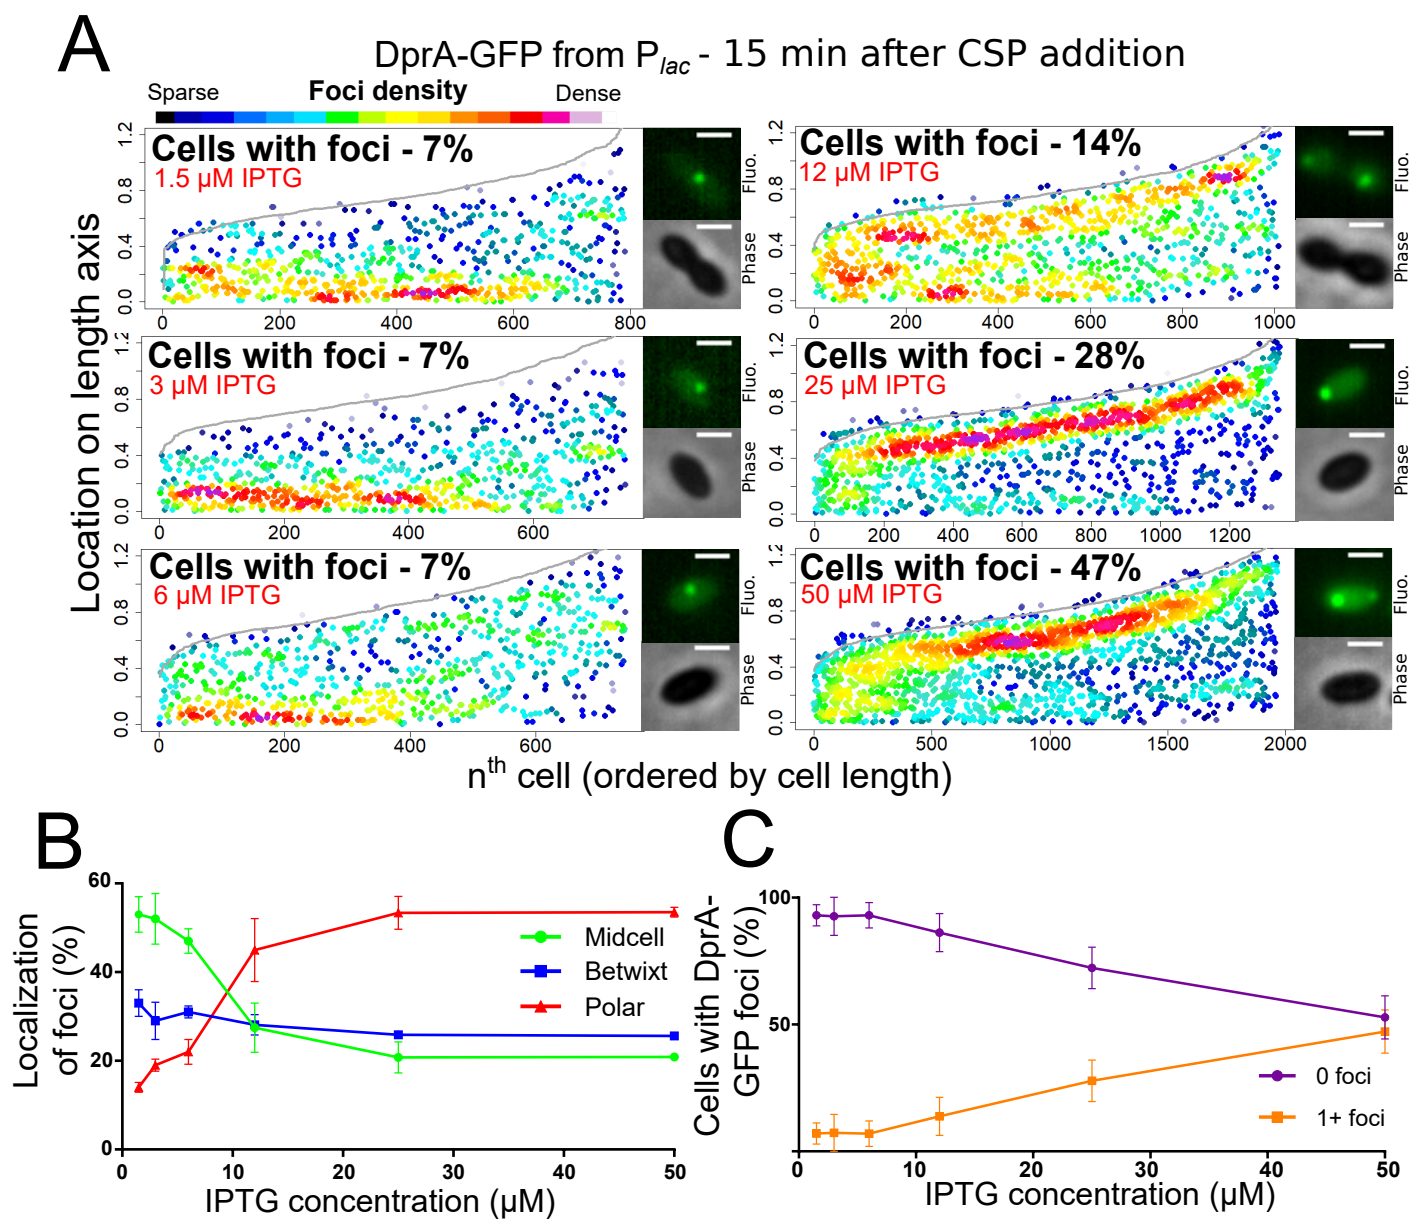

Figure 2

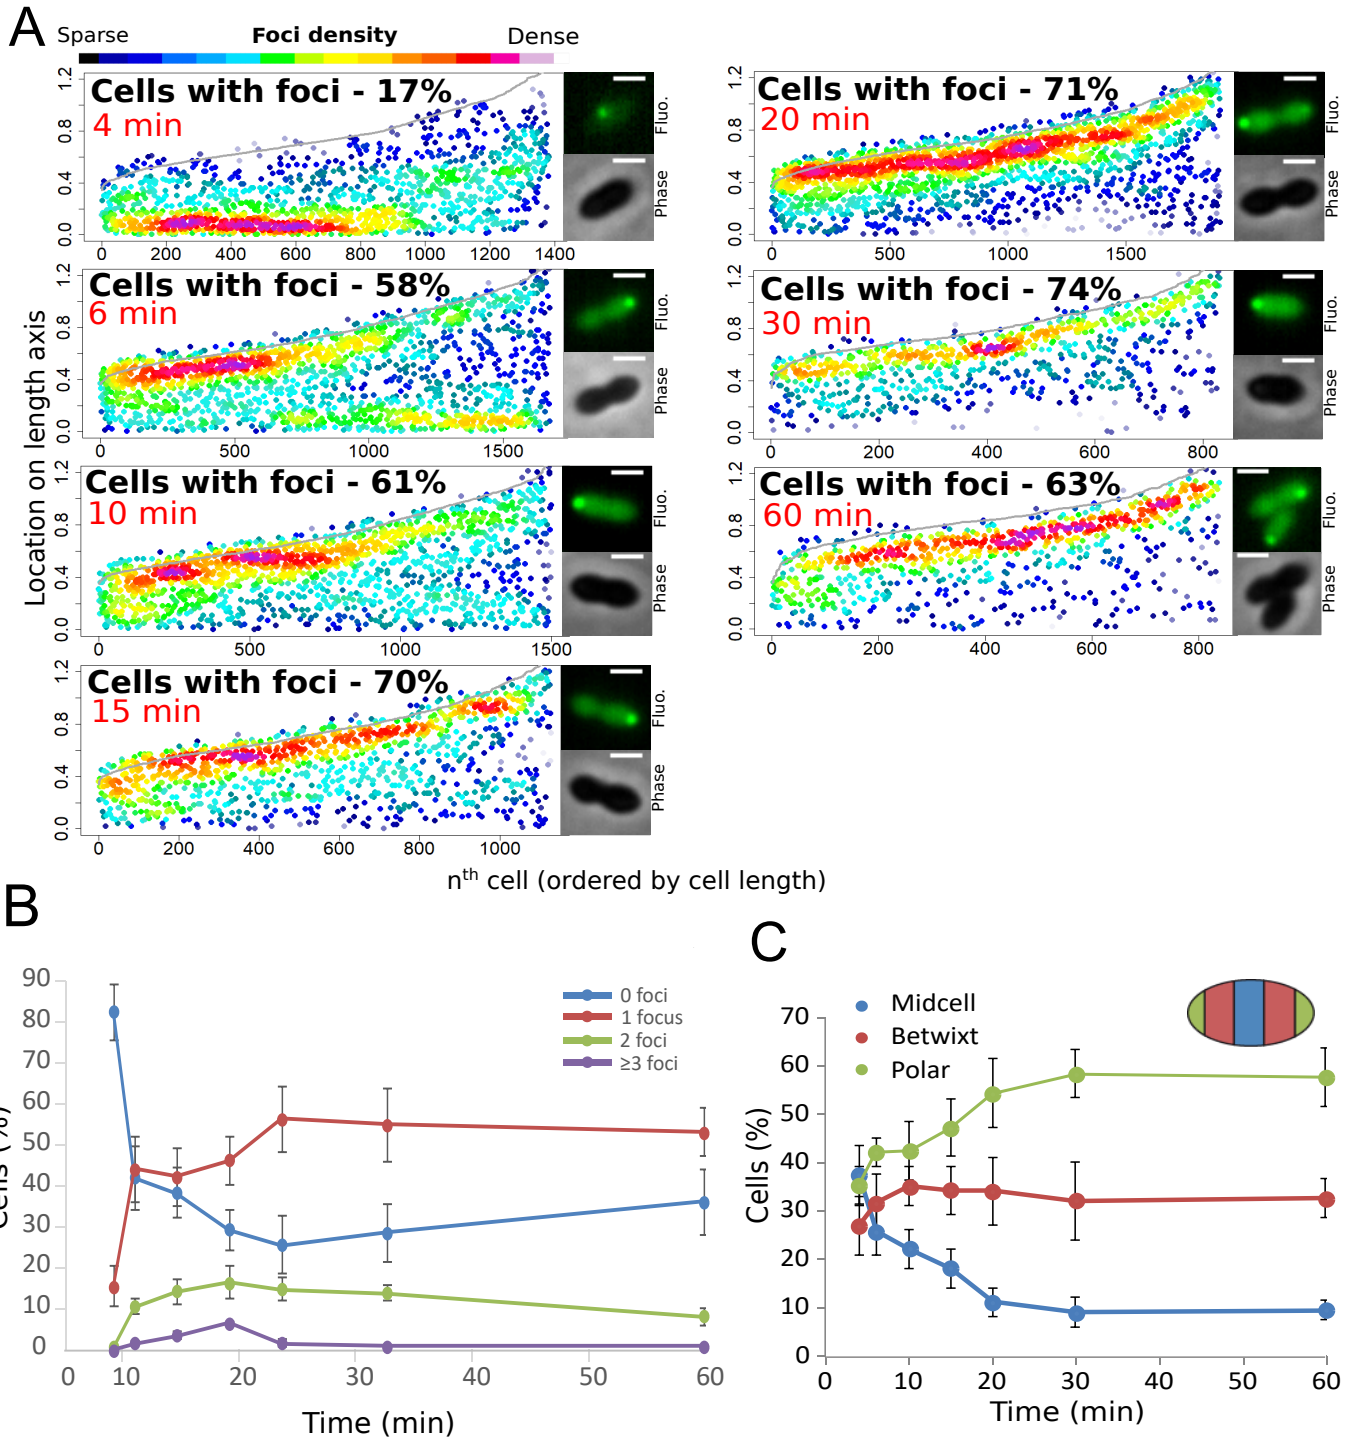

Figure 3



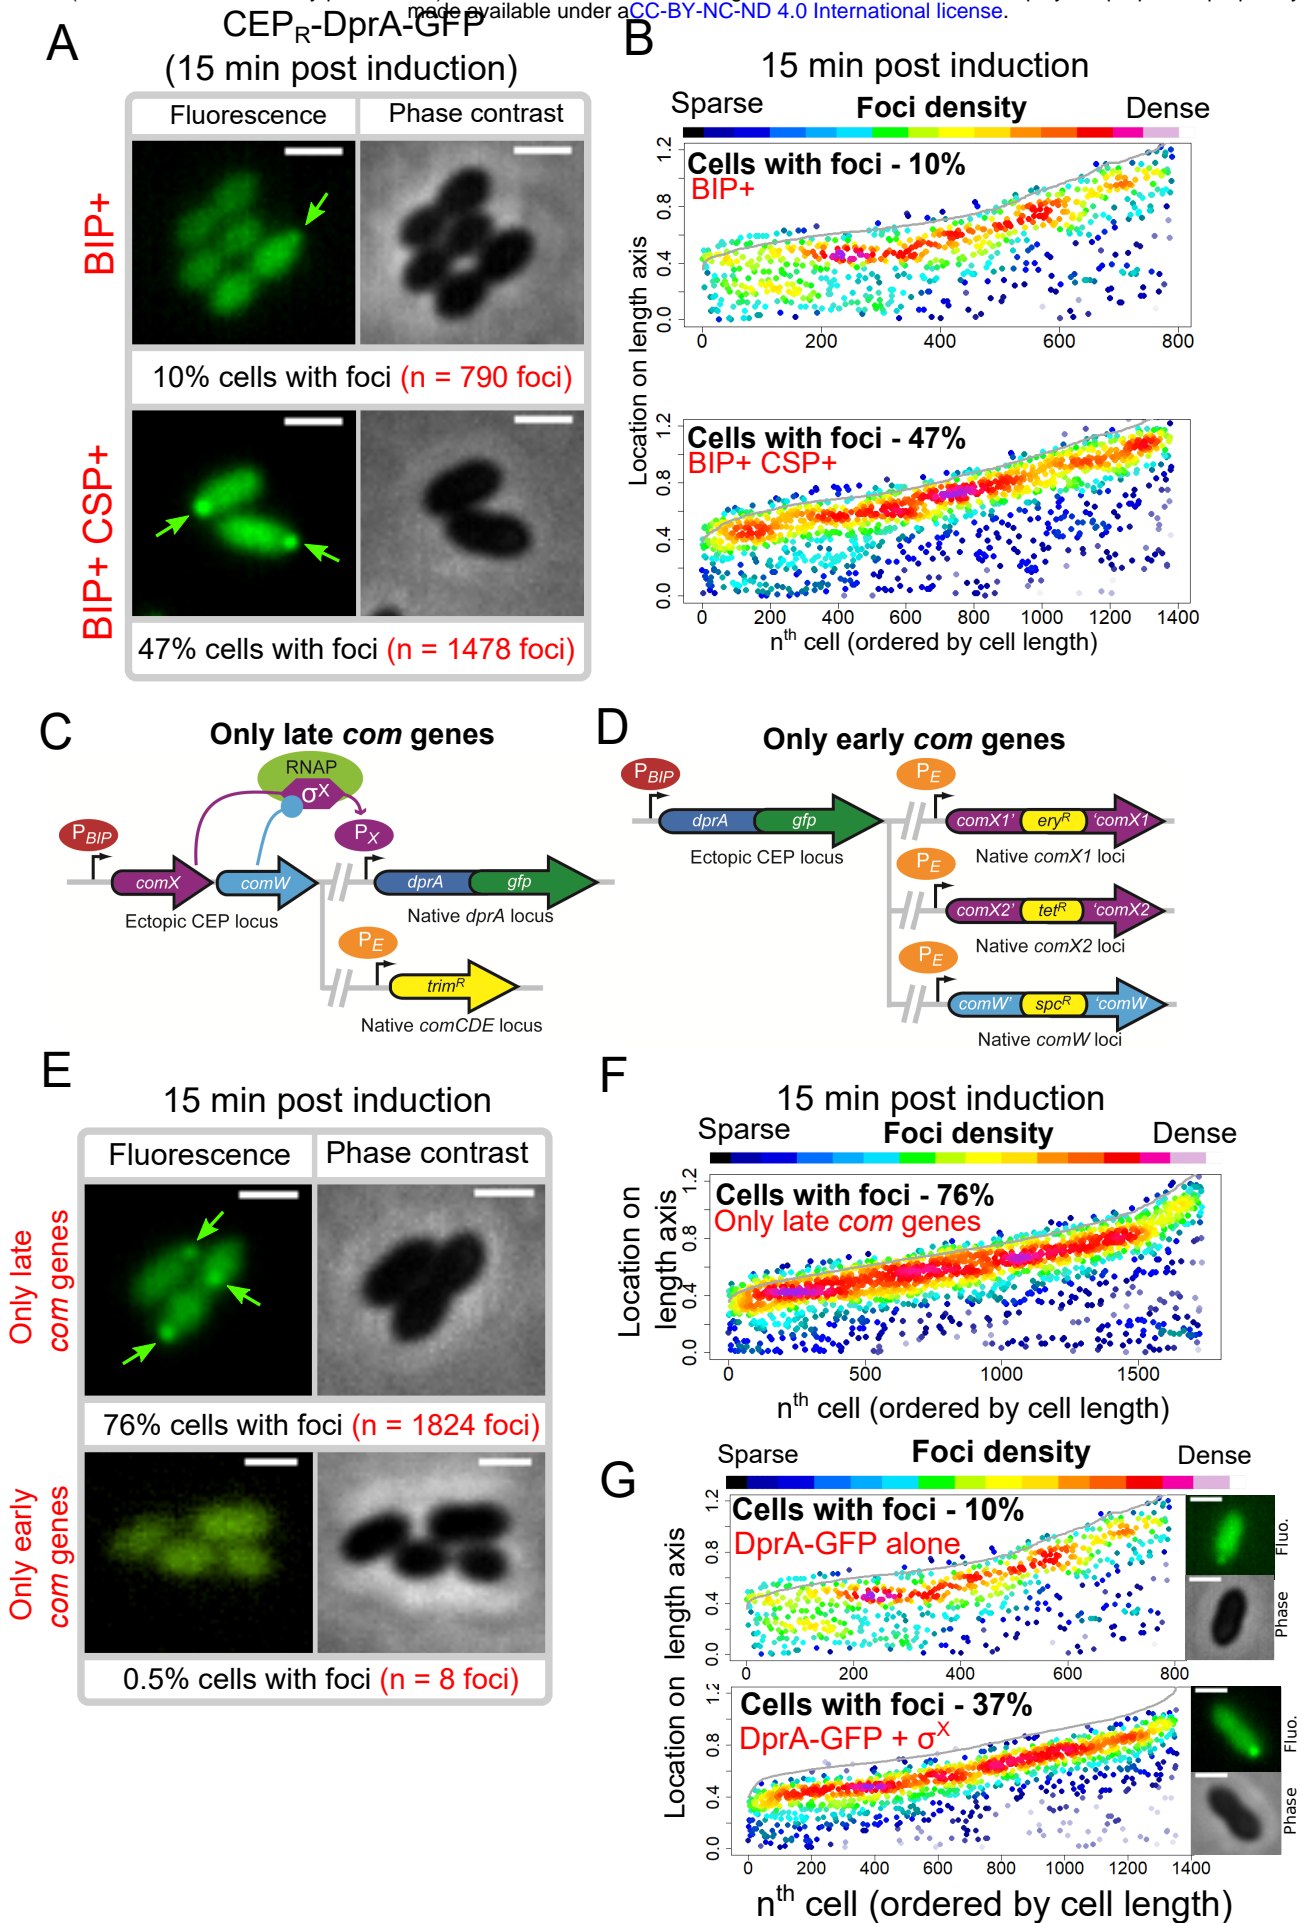

Figure 4



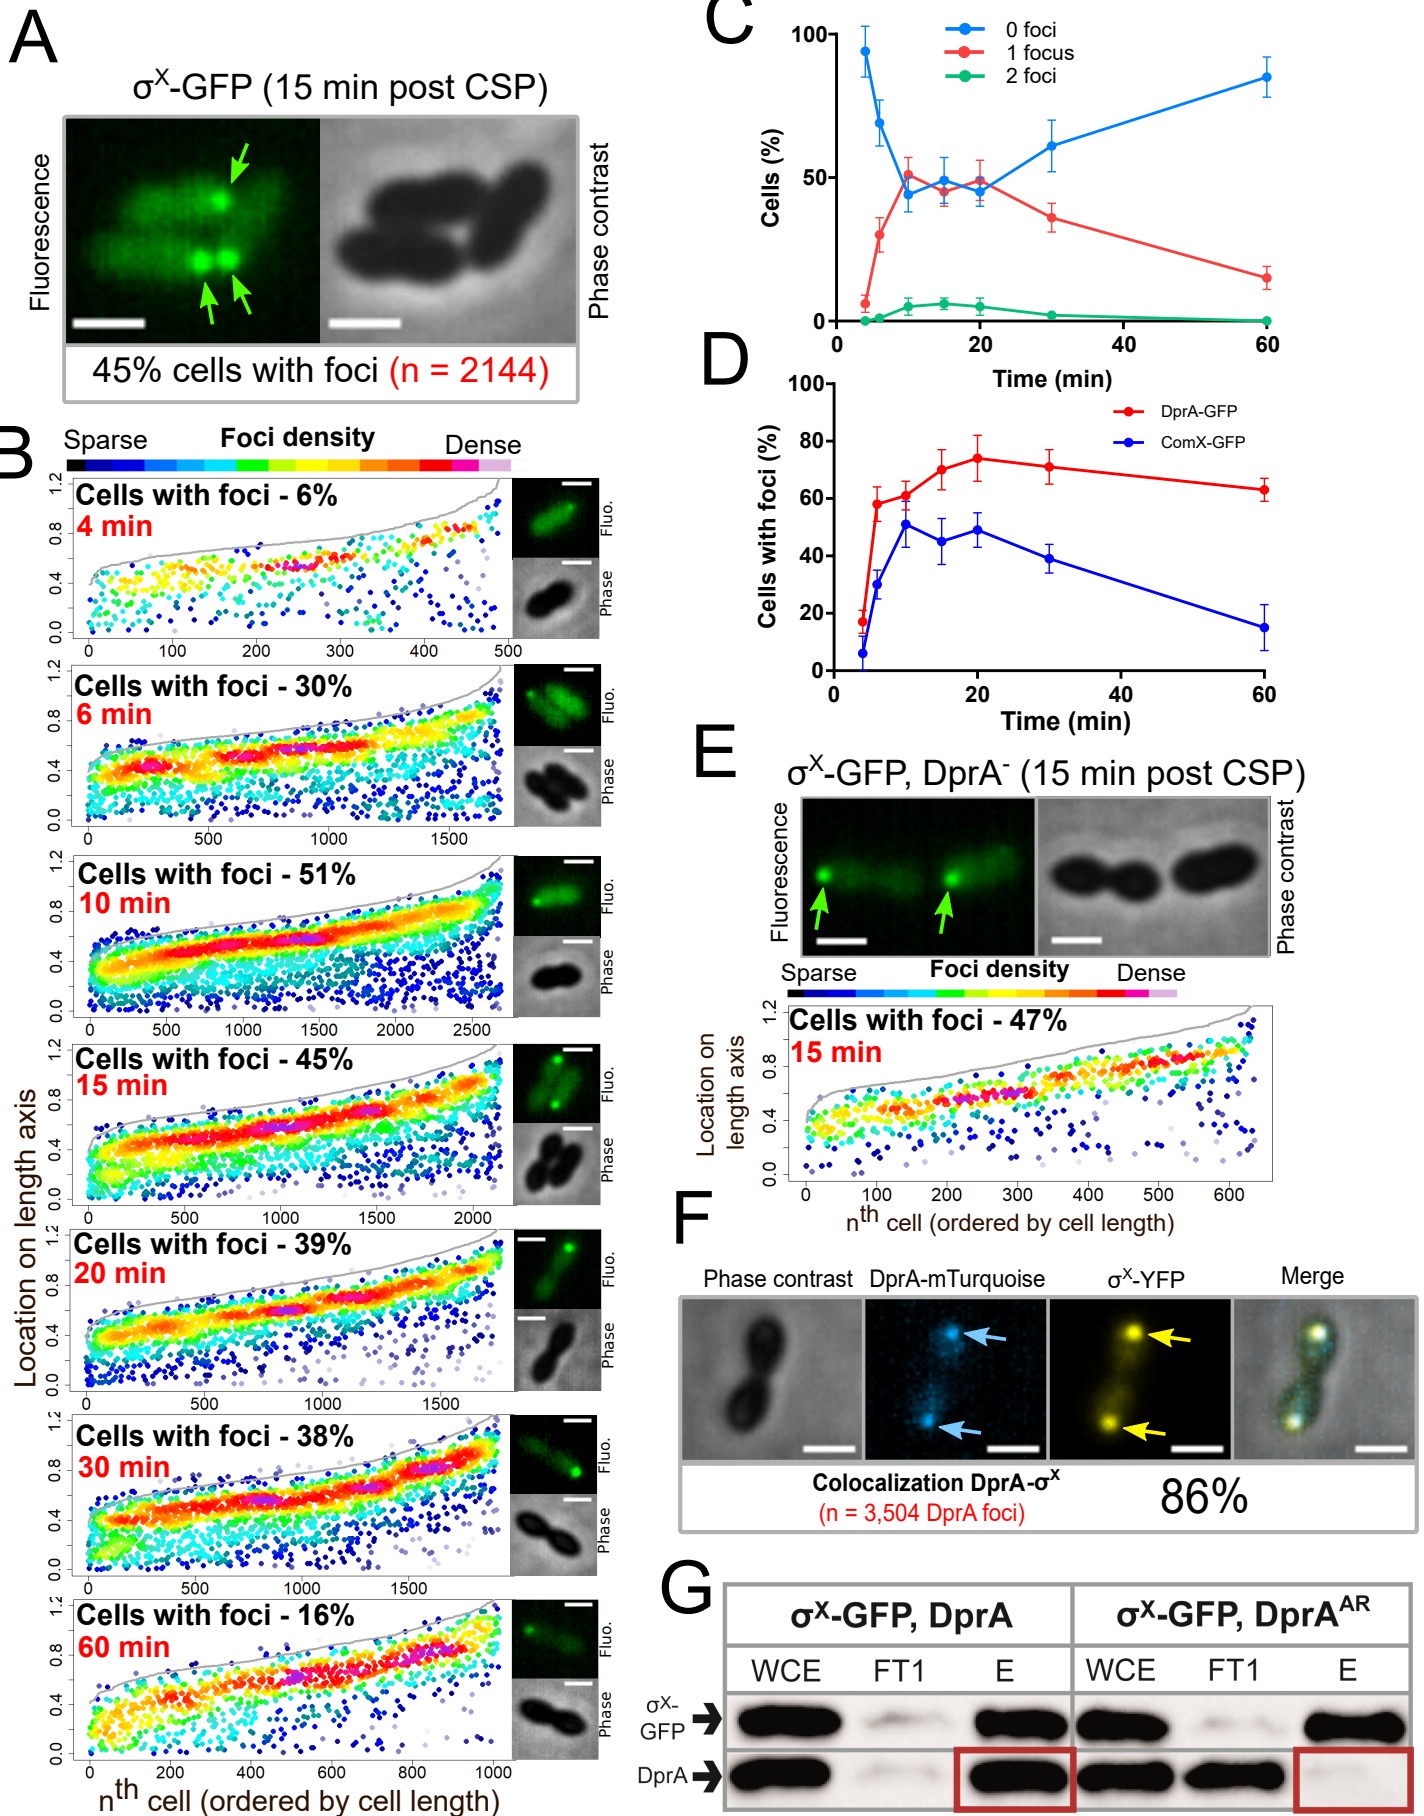

Figure 5

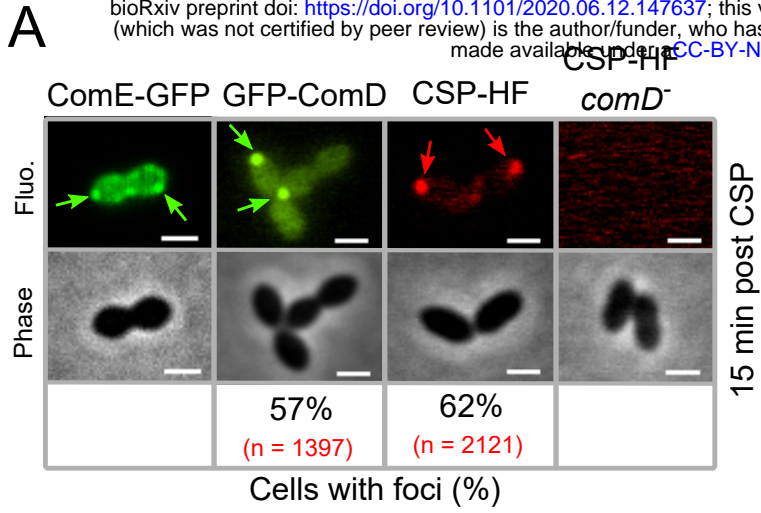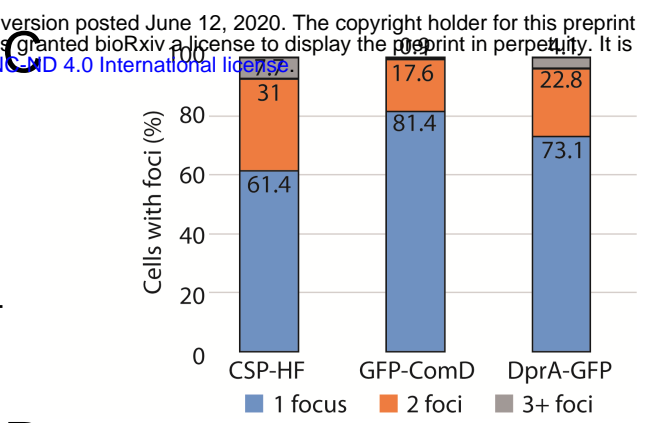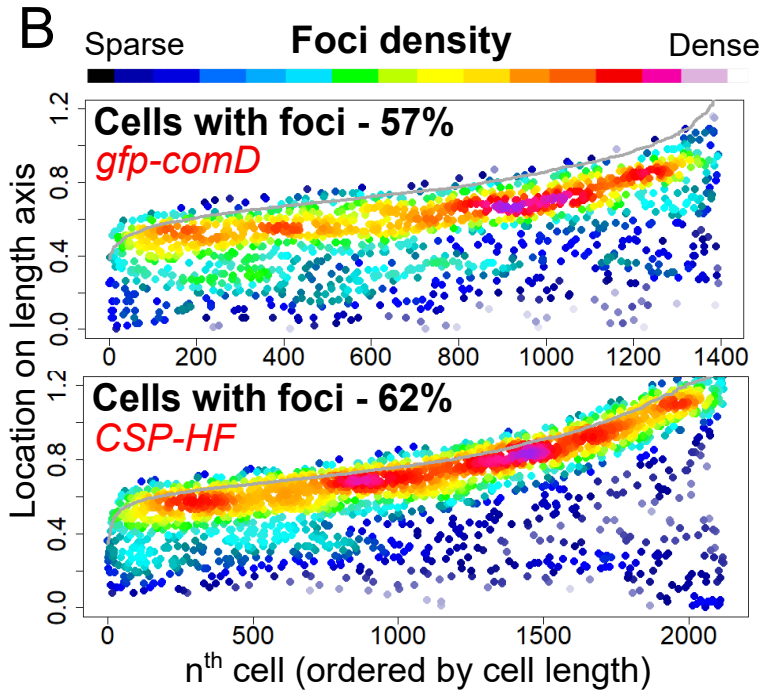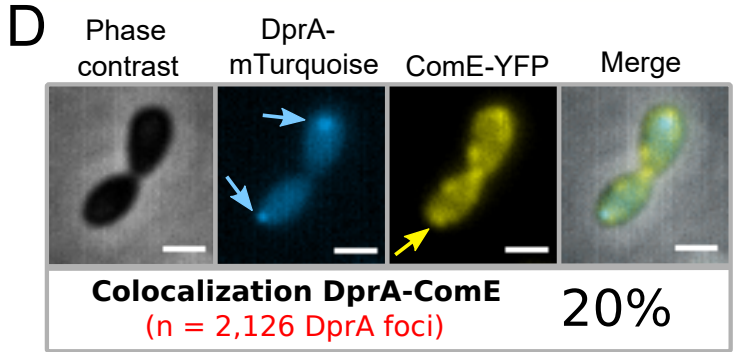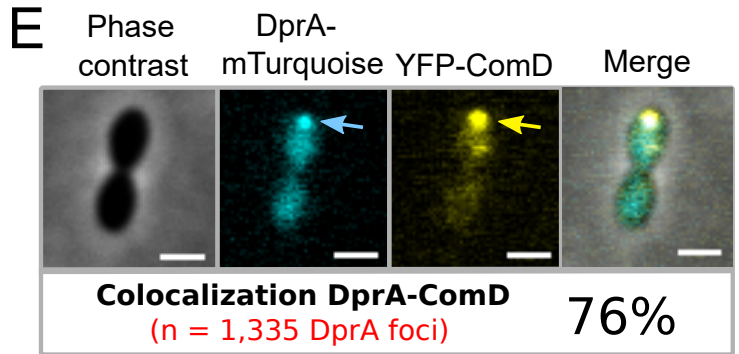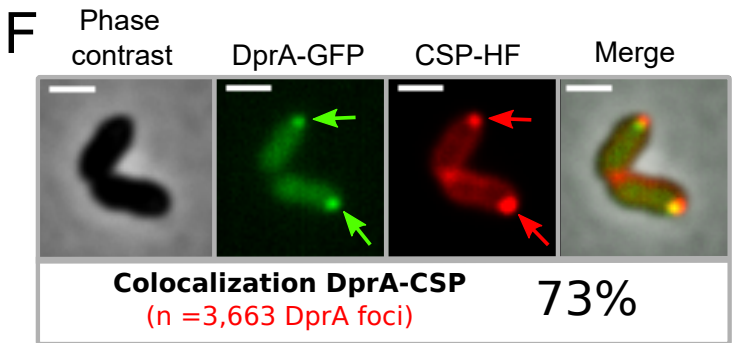

Figure 6

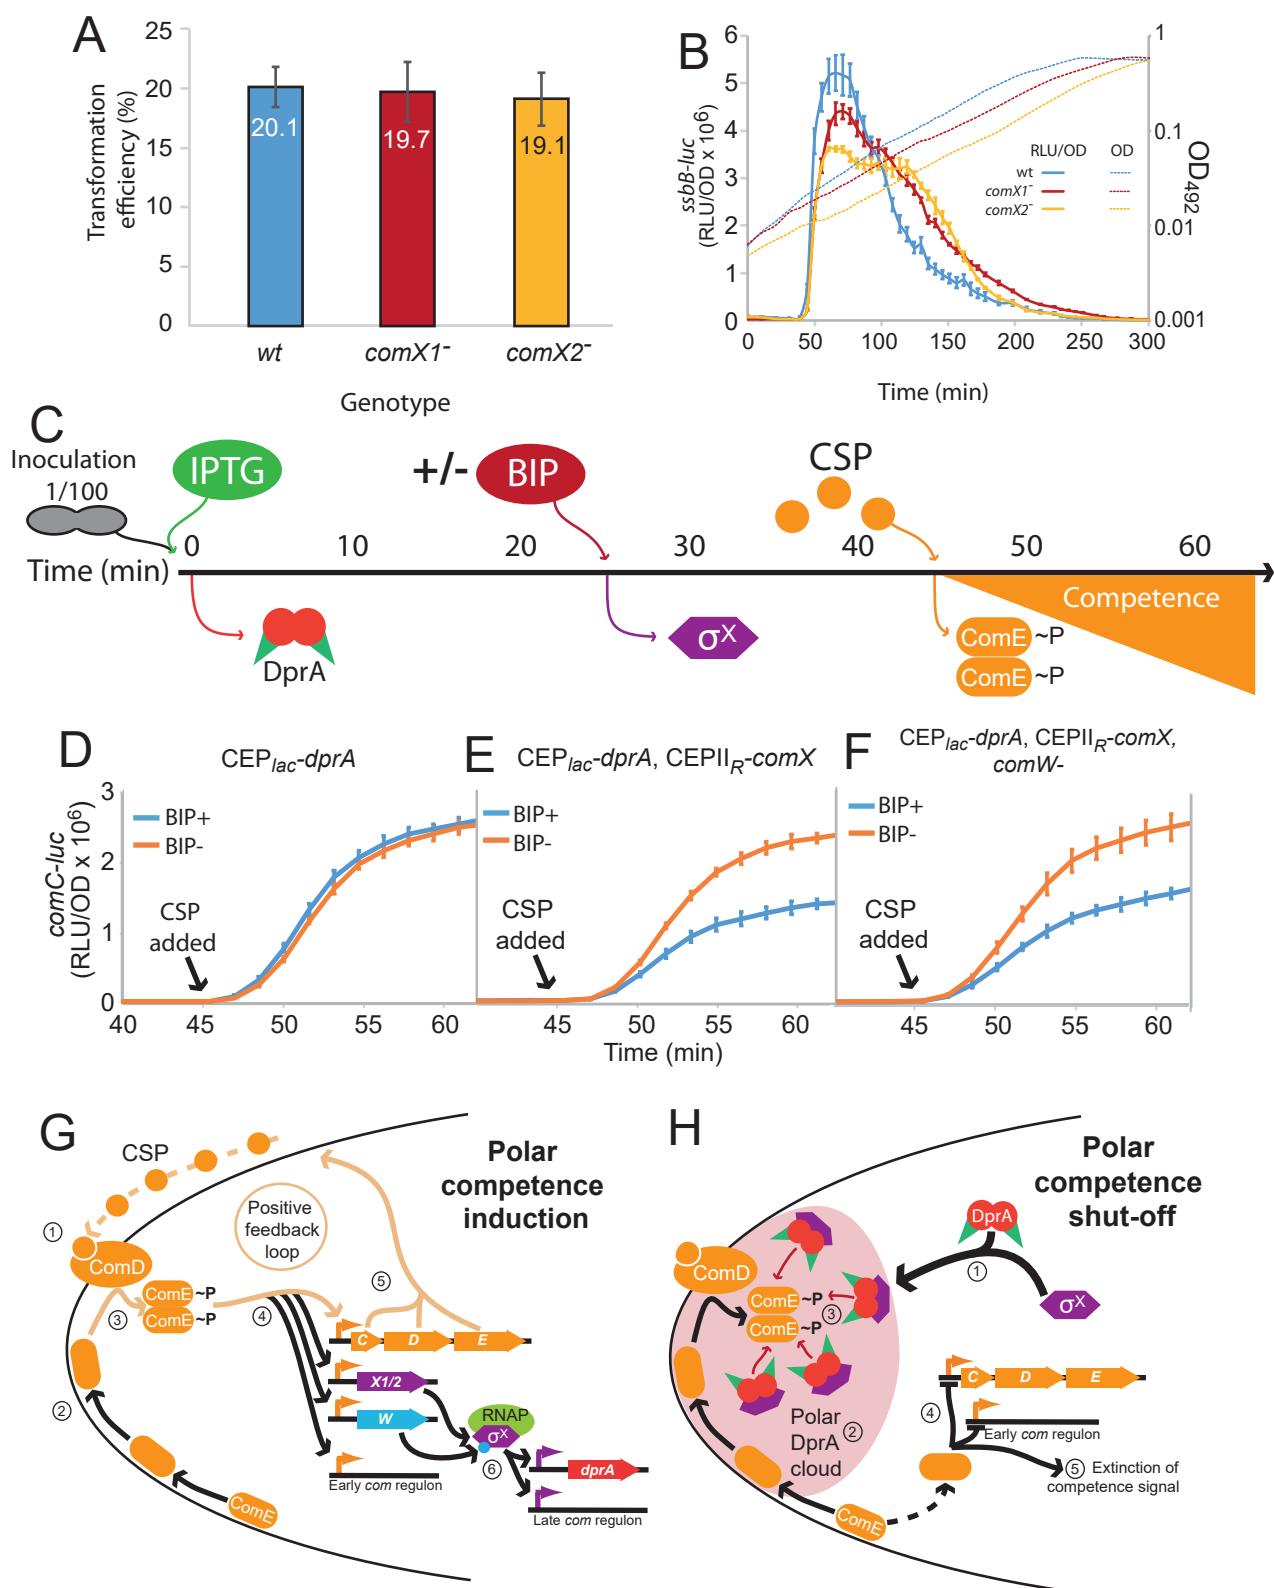

Figure 7

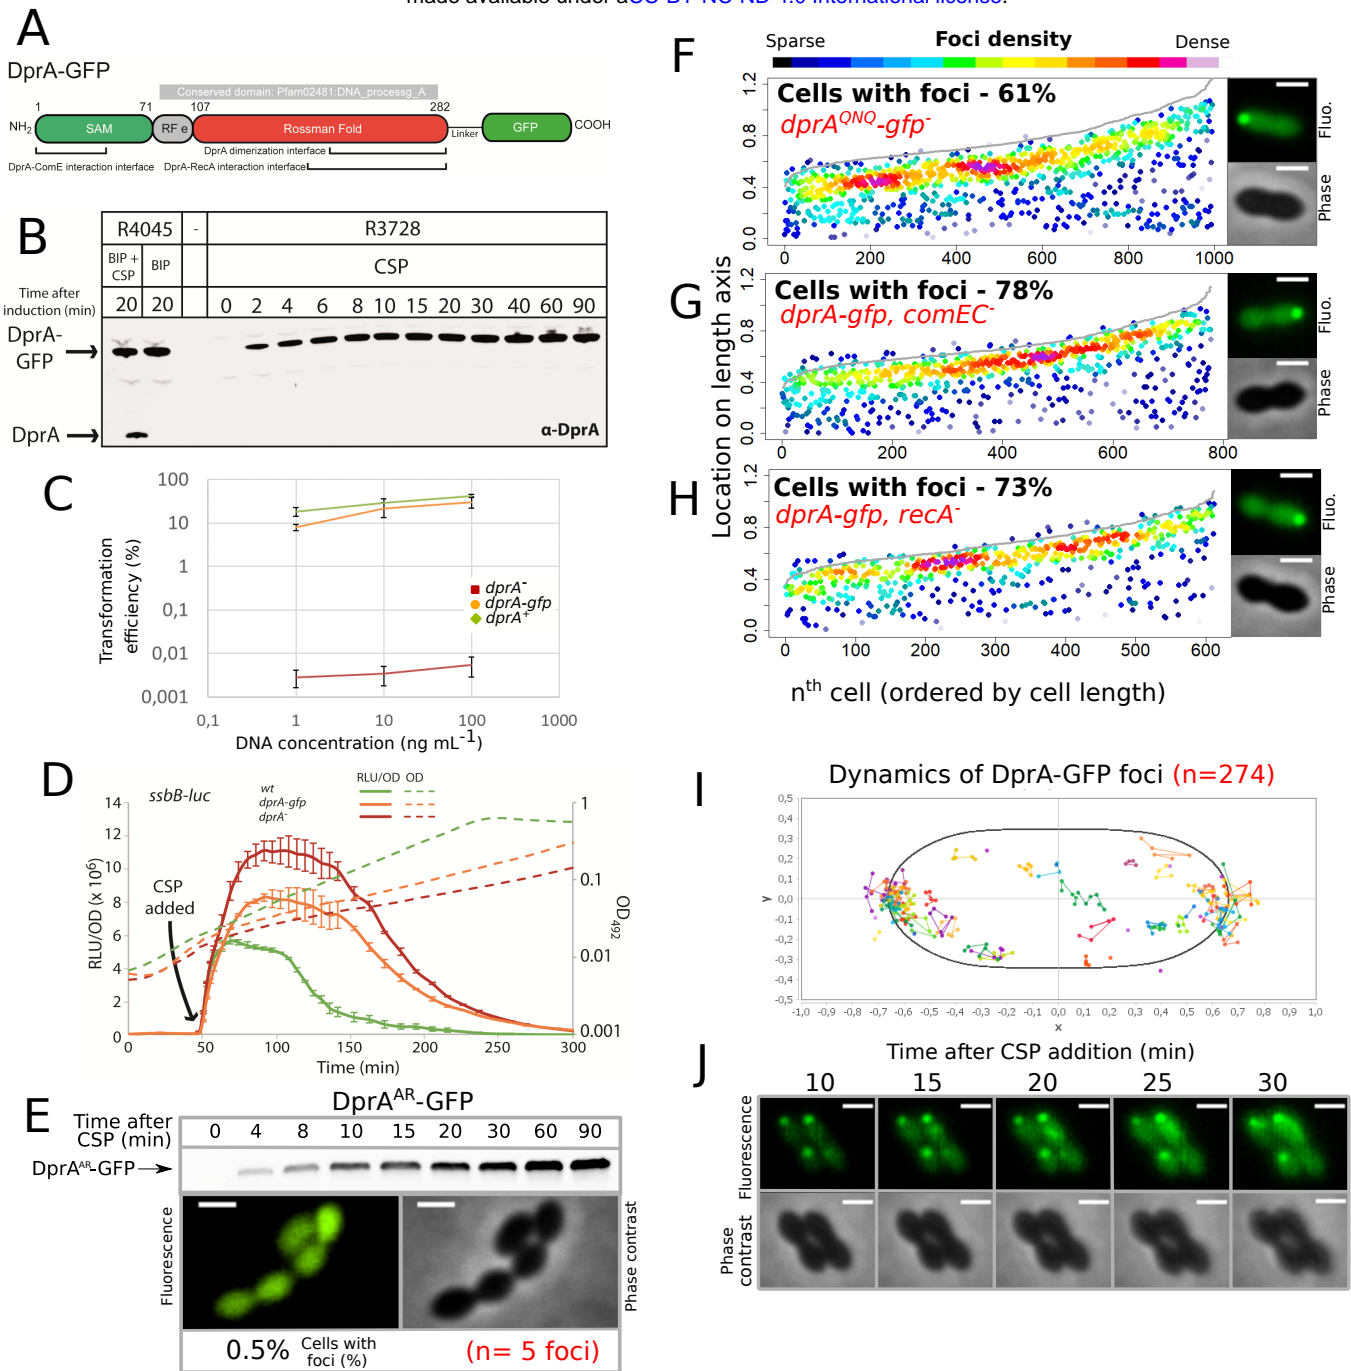

Figure S1

**A**

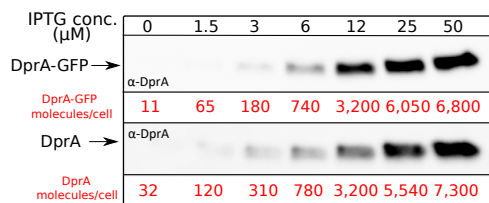

**B**

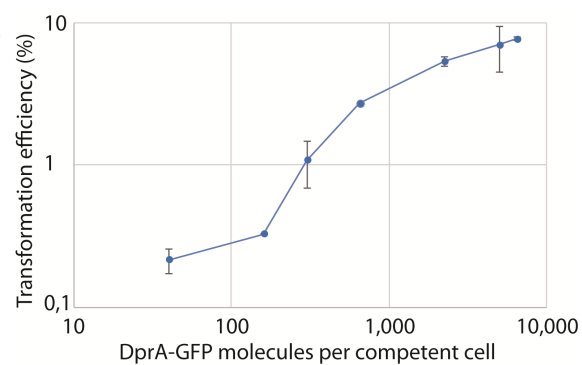

**C**

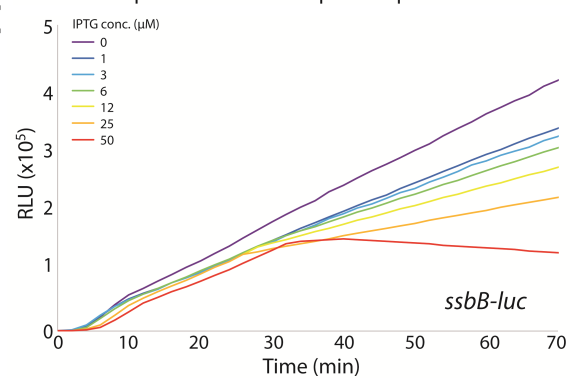

**Figure S2**

**A**

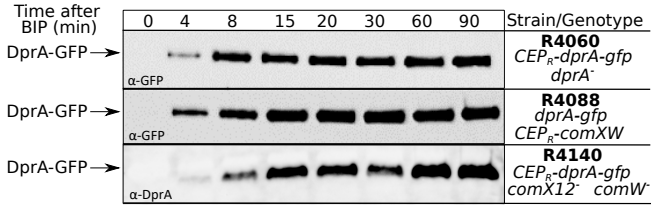

**B**

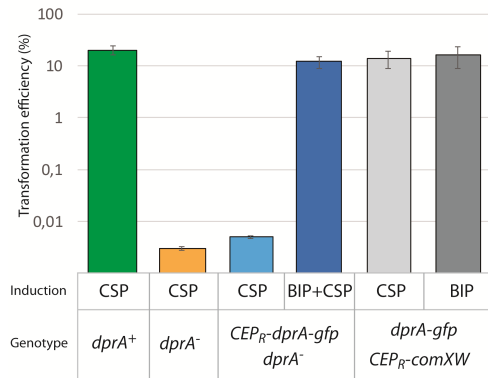

**C**

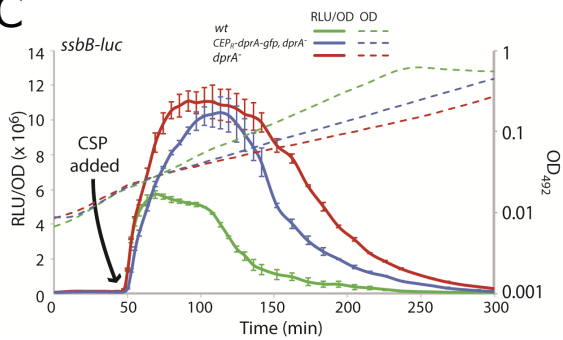

**D**

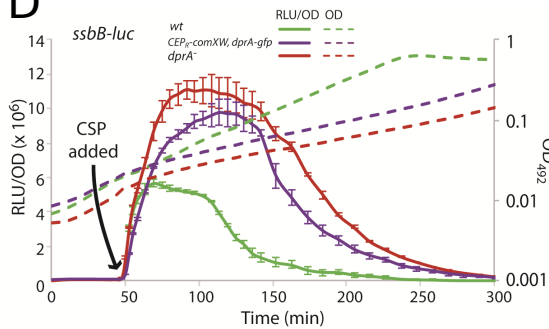

**Figure S3**



**A**

***dprA-gfp, rpoD<sup>A171V</sup>, comW<sup>-</sup>***

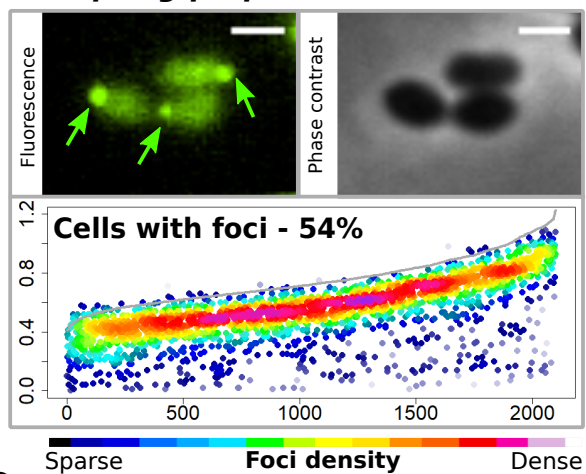

**B**

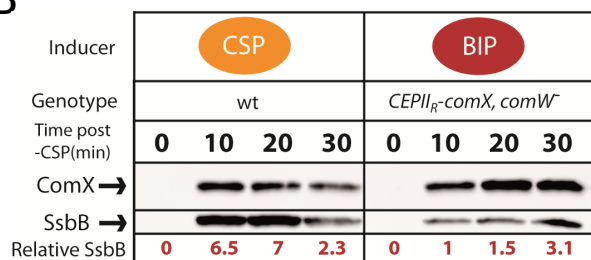

**C**

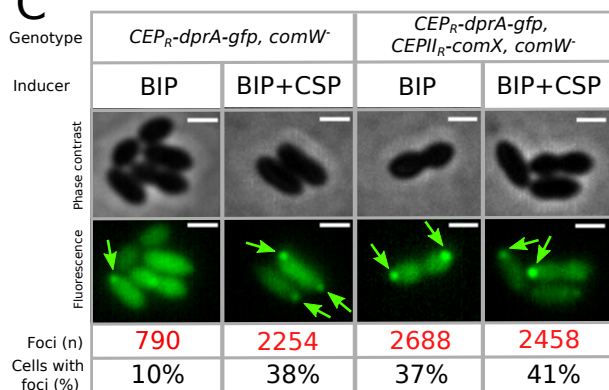

**D**

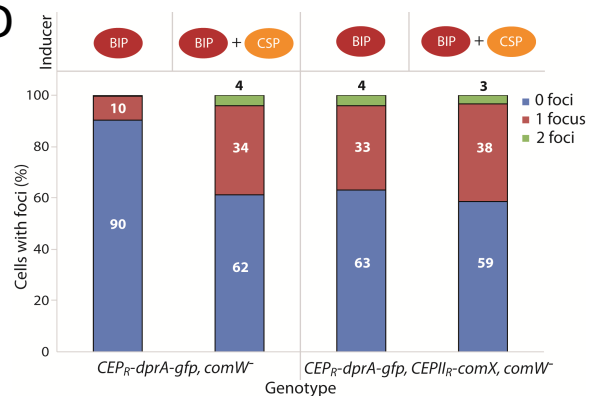

**Figure S4**

***comW-gfp, comW<sup>+</sup>***

**A**

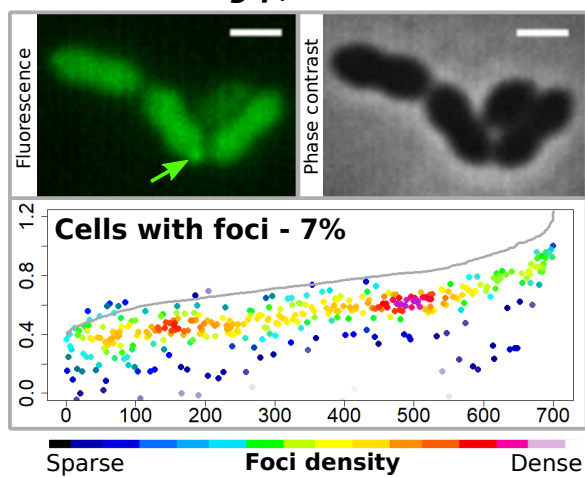

**B**

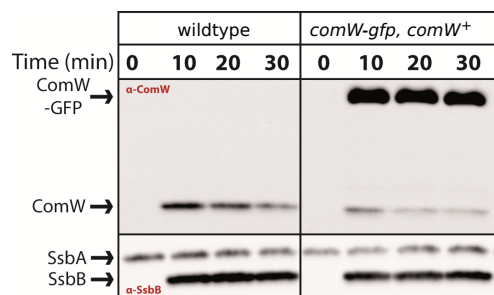

**C**

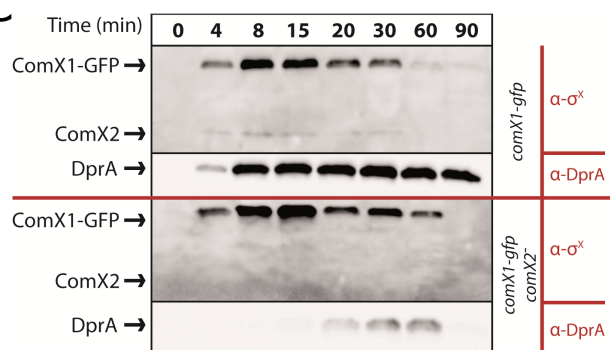

**D**

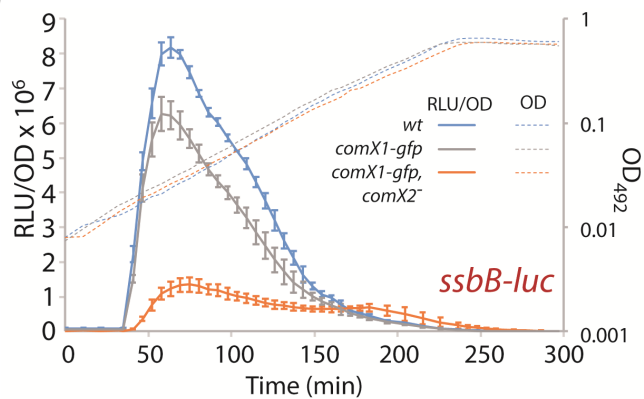

**E**

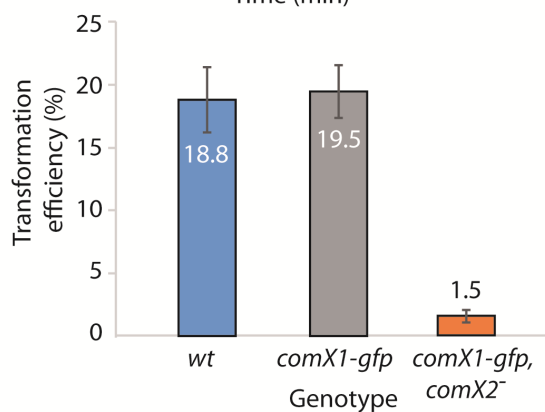

**F**

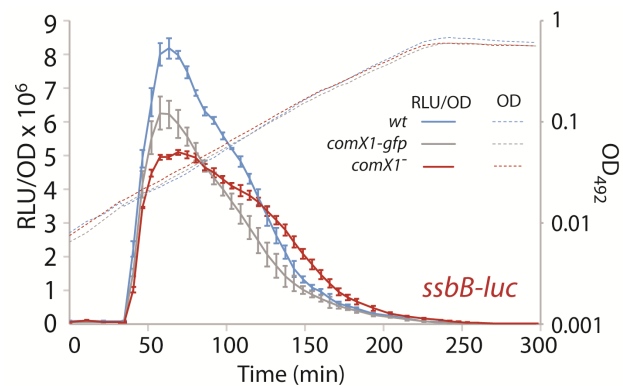

Figure S5



**A**

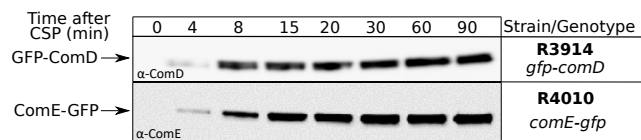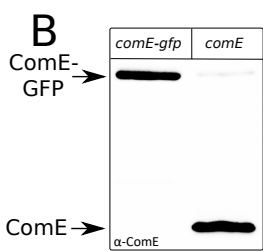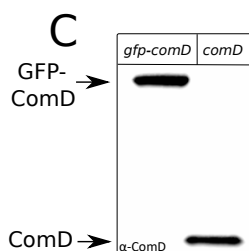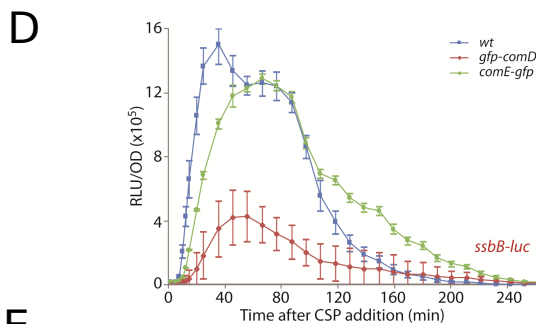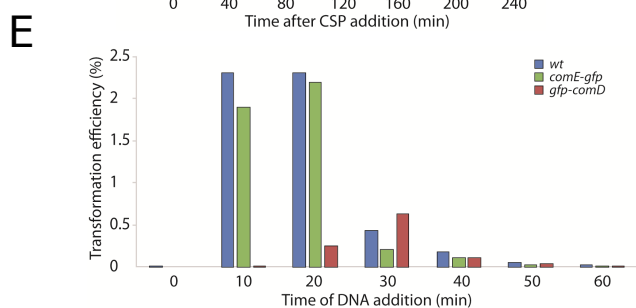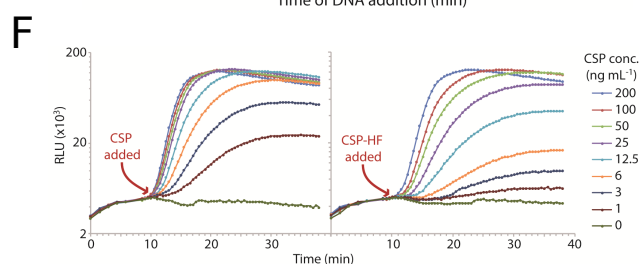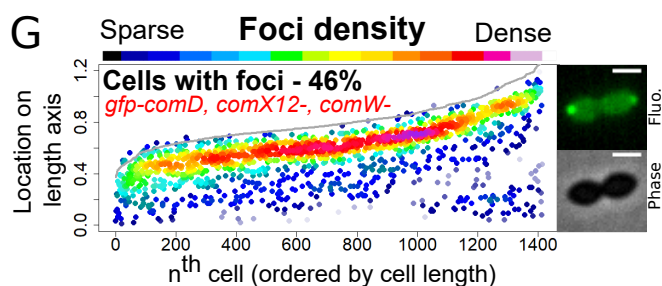

Figure S6

### A ComE-GFP

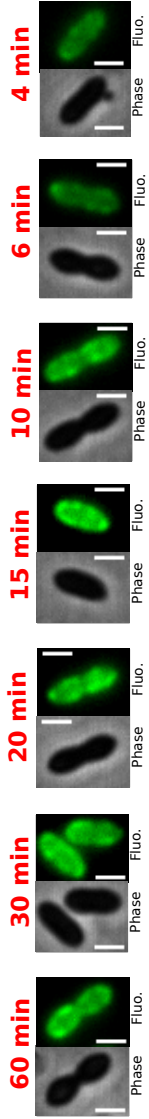

### B GFP-ComD

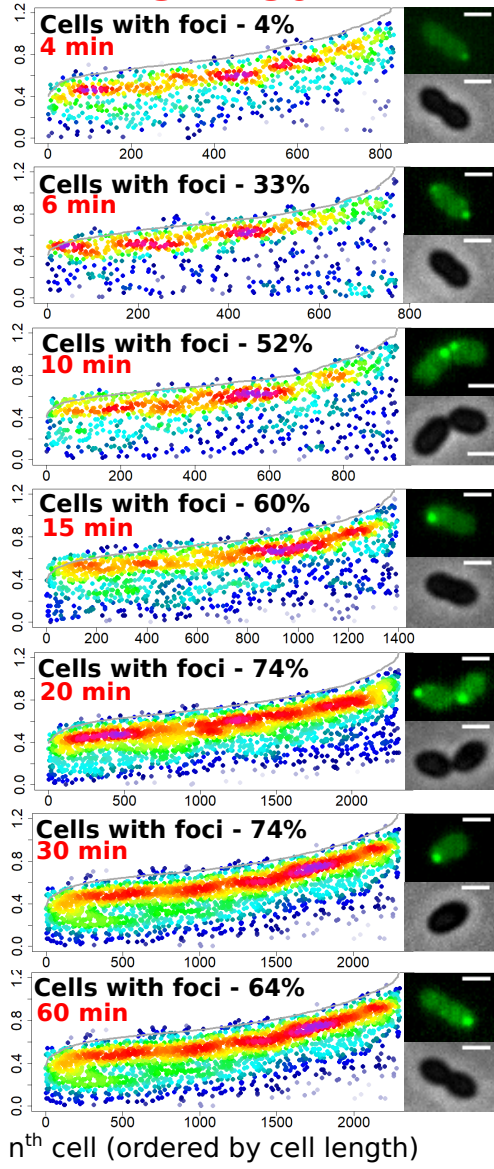

### C CSP-HF

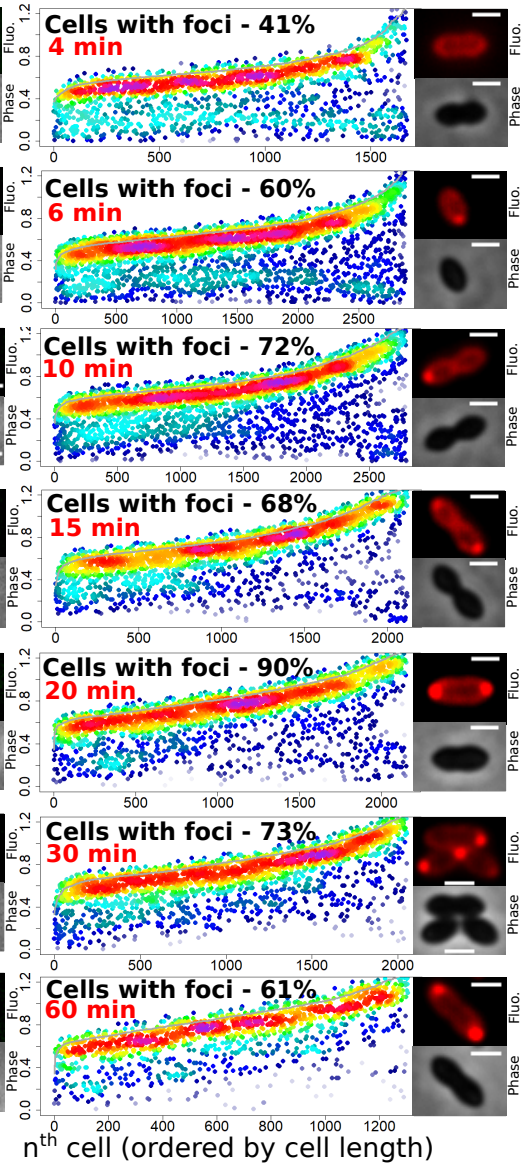

Figure S7

| Recipient | Genotype                          | Protein roles                     | Transformation efficiency (%) | Expected Transformants | Reference             |
|-----------|-----------------------------------|-----------------------------------|-------------------------------|------------------------|-----------------------|
| R4431     | <i>wt</i>                         |                                   | 6,3                           |                        |                       |
| R4434     | <i>comEAC<sup>cinbox-</sup></i>   | DNA-receptor, transformation pore | 0                             | None                   | Campbell et al., 1998 |
| R4438     | <i>comGA-GG<sup>cinbox-</sup></i> | Transformation pilus              | 0,00006                       | Residual               | Campbell et al., 1998 |
| R4440     | <i>comFAC<sup>cinbox-</sup></i>   | DNA-internalizing helicase        | 0,000022                      | Residual               | Campbell et al., 1998 |

**Table S1: Validation of *cinbox* mutant inactivations.**

| Strain | Operon                      | Notable Genes   | Protein functions                                        | Reference                                             | Polar DprA foci ? |
|--------|-----------------------------|-----------------|----------------------------------------------------------|-------------------------------------------------------|-------------------|
| R4260  | <i>spr0023-0027</i>         | <i>radA</i>     | Transformation and genome maintenance – Branch migration | (Burghout et al., 2007; Marie et al., 2017)           | Yes               |
| R4432  | <i>spr0030-0031</i>         |                 |                                                          |                                                       | Yes               |
| R4433  | <i>spr0126-0128</i>         | <i>cibABC</i>   | Bacteriocins                                             | (Guiral et al., 2005)                                 | Yes               |
| R4441  | <i>spr0182-0183</i>         |                 |                                                          |                                                       | Yes               |
| R4442  | <i>spr0690</i>              |                 |                                                          |                                                       | Yes               |
| R4434  | <i>spr0856-0857</i>         | <i>comEA</i>    | Transformation - DNA capture                             | (Pestova and Morrison, 1998)                          | Yes               |
|        |                             | <i>comEC</i>    | Transformation - DNA internalization                     | (Pestova and Morrison, 1998)                          |                   |
| R4435  | <i>spr0881-0884</i>         | <i>coiA</i>     | Unknown                                                  | (Desai and Morrison, 2006)                            | Yes               |
| R4444  | <i>spr0996</i>              | <i>radC</i>     | Unknown                                                  | (Attaiech et al., 2008)                               | Yes               |
| R4443  | <i>spr1003-<br/>spr1111</i> |                 |                                                          |                                                       | Yes               |
| R4436  | <i>spr1144</i>              | <i>dprA</i>     | Transformation, competence shut-off                      | (Mirouze et al., 2013; Mortier-Barrière et al., 2007) | Yes               |
| R4448  | <i>spr1334</i>              |                 |                                                          |                                                       | Yes               |
| R4445  | <i>spr1628</i>              | <i>cclA</i>     |                                                          |                                                       | Yes               |
| R4437  | <i>spr1724</i>              | <i>ssbB</i>     | Transformation - DNA protection                          | (Morrison et al., 2007)                               | Yes               |
| R4446  | <i>spr1754-1758</i>         | <i>cinA</i>     | Unknown                                                  |                                                       | Yes               |
|        |                             | <i>recA</i>     | Recombinase                                              | (Martin et al., 1995)                                 |                   |
|        |                             | <i>dinF</i>     | Unknown                                                  |                                                       |                   |
|        |                             | <i>lytA</i>     | Peptidoglycan hydrolase - autolysis                      | (Sanchez-Puelles et al., 1986)                        |                   |
| R4447  | <i>spr1831</i>              |                 |                                                          |                                                       | Yes               |
| R4438  | <i>spr1858-1964</i>         | <i>comGA-GG</i> | Transformation pilus proteins                            | (Laurenceau et al., 2015, 2013)                       | Yes               |
| R4439  | <i>spr2006</i>              | <i>cbpD</i>     | Peptidoglycan hydrolase, Fratricide                      | (Guiral et al., 2005)                                 | Yes               |
| R4440  | <i>spr2012-2013</i>         | <i>comFA</i>    | ATP-dependent helicase                                   | (Diallo et al., 2017)                                 | Yes               |
|        |                             | <i>comFC</i>    | Unknown                                                  | (Diallo et al., 2017)                                 |                   |

**Table S2: Analysis of DprA-mKate2 localization in *cinbox* mutant strains.**

| Strain | Genotype <sup>a</sup>                                                                                   | Source/Reference                 |  |
|--------|---------------------------------------------------------------------------------------------------------|----------------------------------|--|
| R209   | <i>recA::cat</i> ; Cm <sup>R</sup>                                                                      | (Martin et al., 1995)            |  |
| R304   | <i>rpsL41, rif23, nov1</i> ; Sm <sup>R</sup> , Rif <sup>R</sup> , Nov <sup>R</sup>                      | (Mortier-Barrière et al., 1998)  |  |
| R751   | <i>rpsL1, dprA::spc<sup>21C</sup></i> ; Sm <sup>R</sup> , Spc <sup>R</sup>                              | (Mirouze et al., 2013)           |  |
| R800   | Non-capsulated D39 derivative, with 8,651 bp deletion in the <i>cps</i> locus                           | (Lefevre et al., 1979)           |  |
| R825   | <i>comC-luc</i> ; Cm <sup>R</sup>                                                                       | (Bergé et al., 2002)             |  |
| R895   | <i>ssbB-luc</i> ; Cm <sup>R</sup>                                                                       | (Chastanet et al., 2001)         |  |
| R1036  | <i>rpsL1, comC::kan-rpsL</i>                                                                            | (Sung et al., 2001)              |  |
| R1501  | <i>comC0</i>                                                                                            | (Dagkessamanskaia et al., 2004)  |  |
| R1502  | <i>comC0, ssbB-luc</i> ; Cm <sup>R</sup>                                                                | (Dagkessamanskaia et al., 2004)  |  |
| R1745  | <i>comD::kan<sup>105</sup></i> ; Kan <sup>R</sup>                                                       | (Martin et al., 2013)            |  |
| R1818  | <i>comC0, hexA::ermAM</i> ; Ery <sup>R</sup>                                                            | (Caymaris et al., 2010)          |  |
| R2002  | <i>comC0, comC-luc, comX1::ery, comX2::tet</i> , Cm <sup>R</sup> , Tet <sup>R</sup> , Ery <sup>R</sup>  | (Martin et al., 2013)            |  |
| R2585  | <i>comC0, dprA<sup>AR</sup></i>                                                                         | (Quevillon-Cheruel et al., 2012) |  |
| R2830  | <i>comC0, dprA<sup>QNO</sup></i>                                                                        | (Quevillon-Cheruel et al., 2012) |  |
| R2018  | <i>comC0, ssbB-luc, dprA::spc<sup>21C</sup></i> ; Cm <sup>R</sup> , Spc <sup>R</sup>                    | (Martin et al., 2013)            |  |
| R3369  | <i>comC2D1</i>                                                                                          | (Weyder et al., 2018)            |  |
| R3728  | <i>comC0, dprA-gfp</i> ; Spc <sup>R</sup>                                                               | This study                       |  |
| R3743  | <i>comC0, dprA-gfp, ssbB-luc</i> ; Spc <sup>R</sup> , Cm <sup>R</sup>                                   | This study                       |  |
| R3797  | <i>comC2D1, comC-luc, comX1::ery, comW::spc</i> ; Cm <sup>R</sup> , Ery <sup>R</sup> , Spc <sup>R</sup> | This study                       |  |
| R3833  | <i>comC2D1, CEPlac-dprA, dprA::spc<sup>21C</sup></i> ; Kan <sup>R</sup> , Spc <sup>R</sup>              | (Johnston et al., 2018)          |  |
| R3912  | <i>comC0, radA-gfp</i>                                                                                  | This study                       |  |
| R3914  | <i>rpsL1, gfp-comD</i> ; Sm <sup>R</sup>                                                                | This study                       |  |
| R3915  | <i>rpsL1, gfp-comD, ssbB-luc</i> ; Sm <sup>R</sup> , Cm <sup>R</sup>                                    | This study                       |  |
| R3932  | <i>comC2D1, CEP<sub>R</sub>-comXW, ssbB-luc</i> ; Kan <sup>R</sup> , Cm <sup>R</sup>                    | (Weyder et al., 2018)            |  |
| R4010  | <i>comC0, comE-gfp</i>                                                                                  | This study                       |  |

|       |                                                                                                                                                                    |                                 |  |
|-------|--------------------------------------------------------------------------------------------------------------------------------------------------------------------|---------------------------------|--|
| R4011 | <i>comC0, ssbB-luc, ftsZ-mTurquoise</i>                                                                                                                            | (Mortier-Barrière et al., 2019) |  |
| R4015 | <i>comC0, dprA-gfp, hexA::ermAM; Spc<sup>R</sup>, Ery<sup>R</sup></i>                                                                                              | This study                      |  |
| R4016 | <i>comC0, comE-gfp, hexA::ermAM; Ery<sup>R</sup></i>                                                                                                               | This study                      |  |
| R4045 | <i>comC0, CEP<sub>R</sub>-dprA-gfp; Kan<sup>R</sup></i>                                                                                                            | This study                      |  |
| R4046 | <i>comC0, dprA-gfp<sup>AR</sup>; Spc<sup>R</sup></i>                                                                                                               | This study                      |  |
| R4047 | <i>comC0, dprA-gfp<sup>QNG</sup>; Spc<sup>R</sup></i>                                                                                                              | This study                      |  |
| R4048 | <i>comC0, dprA-mKate2; Spc<sup>R</sup></i>                                                                                                                         | This study                      |  |
| R4060 | <i>comC0, CEP<sub>R</sub>-dprA-gfp, dprA::spc<sup>21C</sup>; Kan<sup>R</sup>, Spc<sup>R</sup></i>                                                                  | This study                      |  |
| R4061 | <i>comC0, dprA-gfp, hexA::ermAM, recA::cat; Spc<sup>R</sup>, Ery<sup>R</sup>, Cm<sup>R</sup></i>                                                                   | This study                      |  |
| R4062 | <i>comC0, dprA-mTurquoise; Spc<sup>R</sup></i>                                                                                                                     | This study                      |  |
| R4076 | <i>comC0, dprA-gfp, hexA::ermAM; CEP<sub>R</sub>-comXW; Spc<sup>R</sup>, Ery<sup>R</sup>, Kan<sup>R</sup></i>                                                      | This study                      |  |
| R4082 | <i>comC0, dprA-gfp ΔcomEC::kan; Spc<sup>R</sup>, Kan<sup>R</sup></i>                                                                                               | This study                      |  |
| R4085 | <i>rpsl1, gfp-comD, hexA::ermAM; Sm<sup>R</sup>, Ery<sup>R</sup></i>                                                                                               | This study                      |  |
| R4087 | <i>comC0, comE-gfp, ssbB-luc; Cm<sup>R</sup></i>                                                                                                                   | This study                      |  |
| R4088 | <i>comC0, dprA-gfp, hexA::ermAM; CEP<sub>R</sub>-comXW, cbpD::cat; Spc<sup>R</sup>, Ery<sup>R</sup>, Kan<sup>R</sup>, Cm<sup>R</sup></i>                           | This study                      |  |
| R4091 | <i>comC0, rada<sup>cinbox-</sup>, hexA::ermAM; Ery<sup>R</sup></i>                                                                                                 | This study                      |  |
| R4095 | <i>rpsl1, gfp-comD, hexA::ermAM, dprA-mTurquoise; Sm<sup>R</sup>, Ery<sup>R</sup>, Kan<sup>R</sup></i>                                                             | This study                      |  |
| R4105 | <i>rpsl1, yfp-comD, hexA::ermAM, dprA-mTurquoise; Sm<sup>R</sup>, Ery<sup>R</sup>, Spc<sup>R</sup></i>                                                             | This study                      |  |
| R4107 | <i>dprA-gfp, hexA::ermAM; CEP<sub>R</sub>-comXW, cbpD::cat, ΔcomCDE::trim; Spc<sup>R</sup>, Ery<sup>R</sup>, Kan<sup>R</sup>, Cm<sup>R</sup>, Trim<sup>R</sup></i> | This study                      |  |
| R4111 | <i>rpsl1, yfp-comD, hexA::ermAM, dprA-mTurquoise, comA::kan; Sm<sup>R</sup>, Ery<sup>R</sup>, Spc<sup>R</sup>, Kan<sup>R</sup></i>                                 | This study                      |  |
| R4112 | <i>rpsl1, gfp-comD, comA::kan; Sm<sup>R</sup>, Kan<sup>R</sup></i>                                                                                                 | This study                      |  |
| R4138 | <i>comC0, CEP<sub>R</sub>-dprA-gfp, comX2::tet; Kan<sup>R</sup>, Tet<sup>R</sup></i>                                                                               | This study                      |  |
| R4140 | <i>comC0, CEP<sub>R</sub>-dprA-gfp, comX2::tet, comX1::ery, comW::spc; Kan<sup>R</sup>, Tet<sup>R</sup>, Ery<sup>R</sup>, Spc<sup>R</sup></i>                      | This study                      |  |
| R4150 | <i>comC0, hexA::ermAM, rpoD<sup>A171V</sup>; Ery<sup>R</sup></i>                                                                                                   | This study                      |  |
| R4155 | <i>comC0, hexA::ermAM, rpoD<sup>A171V</sup>, comW::spc; Ery<sup>R</sup>, Spc<sup>R</sup></i>                                                                       | This study                      |  |
| R4166 | <i>comC0, hexA::ermAM, rpoD<sup>A171V</sup>, comW::cat; Ery<sup>R</sup>, Cm<sup>R</sup></i>                                                                        | This study                      |  |
| R4168 | <i>comC0, hexA::ermAM, rpoD<sup>A171V</sup>, comW::cat, dprA-gfp; Ery<sup>R</sup>, Cm<sup>R</sup>, Spc<sup>R</sup></i>                                             | This study                      |  |
| R4171 | <i>comC0, comE-yfp, hexA::ermAM; Ery<sup>R</sup></i>                                                                                                               | This study                      |  |
| R4176 | <i>comC0, comE-yfp, hexA::ermAM, dprA-mTurquoise; Ery<sup>R</sup>, Spc<sup>R</sup></i>                                                                             | This study                      |  |
| R4222 | <i>comC0, CEP<sub>R</sub>-dprA-gfp, dprA::spc<sup>21C</sup>, ssbB-luc; Kan<sup>R</sup>, Spc<sup>R</sup>, Cm<sup>R</sup></i>                                        | This study                      |  |

|       |                                                                                                                                 |            |  |
|-------|---------------------------------------------------------------------------------------------------------------------------------|------------|--|
| R4260 | <i>comC0, dprA-gfp, hexA::ermAM, radC<sup>cin-</sup>; Spc<sup>R</sup>, Ery<sup>R</sup></i>                                      | This study |  |
| R4261 | <i>comC0, CEP<sub>lac</sub>-dprA-gfp; Kan<sup>R</sup></i>                                                                       | This study |  |
| R4262 | <i>comC0, CEP<sub>lac</sub>-dprA-gfp, dprA::spc<sup>21C</sup>; Kan<sup>R</sup>, Spc<sup>R</sup></i>                             | This study |  |
| R4265 | <i>comC0, rada<sup>cinbox-</sup>, hexA::ermAM, dprA-gfp; Ery<sup>R</sup>, Spc<sup>R</sup></i>                                   | This study |  |
| R4402 | <i>comC2D1, CEP<sub>lac</sub>-dprA-gfp, dprA::spc<sup>21C</sup>, ssbB-luc; Kan<sup>R</sup>, Spc<sup>R</sup>, Cm<sup>R</sup></i> | This study |  |
| R4431 | <i>comC0, radA-gfp, dprA-mKate2; Spc<sup>R</sup></i>                                                                            | This study |  |
| R4432 | <i>comC0, radA-gfp, dprA-mKate2, spr0031<sup>cinbox-</sup>; Spc<sup>R</sup></i>                                                 | This study |  |
| R4433 | <i>comC0, radA-gfp, dprA-mKate2, cibA<sup>cinbox-</sup>; Spc<sup>R</sup></i>                                                    | This study |  |
| R4434 | <i>comC0, radA-gfp, dprA-mKate2, comEA<sup>cinbox-</sup>; Spc<sup>R</sup></i>                                                   | This study |  |
| R4435 | <i>comC0, radA-gfp, dprA-mKate2, coiA<sup>cinbox-</sup>; Spc<sup>R</sup></i>                                                    | This study |  |
| R4436 | <i>comC0, radA-gfp, dprA-mKate2, radA<sup>cinbox-</sup>; Spc<sup>R</sup></i>                                                    | This study |  |
| R4437 | <i>comC0, radA-gfp, dprA-mKate2, ssb<sup>cinbox-</sup>; Spc<sup>R</sup></i>                                                     | This study |  |
| R4438 | <i>comC0, radA-gfp, dprA-mKate2, comGA<sup>cinbox-</sup>; Spc<sup>R</sup></i>                                                   | This study |  |
| R4439 | <i>comC0, radA-gfp, dprA-mKate2, cbpD<sup>cinbox-</sup>; Spc<sup>R</sup></i>                                                    | This study |  |
| R4440 | <i>comC0, radA-gfp, dprA-mKate2, comFA<sup>cinbox-</sup>; Spc<sup>R</sup></i>                                                   | This study |  |
| R4441 | <i>comC0, radA-gfp, dprA-mKate2, spr0182<sup>cinbox-</sup>; Spc<sup>R</sup></i>                                                 | This study |  |
| R4442 | <i>comC0, radA-gfp, dprA-mKate2, spr0690<sup>cinbox-</sup>; Spc<sup>R</sup></i>                                                 | This study |  |
| R4443 | <i>comC0, radA-gfp, dprA-mKate2, spr1003<sup>cinbox-</sup>; Spc<sup>R</sup></i>                                                 | This study |  |
| R4444 | <i>comC0, radA-gfp, dprA-mKate2, radC<sup>cinbox-</sup>; Spc<sup>R</sup></i>                                                    | This study |  |
| R4445 | <i>comC0, radA-gfp, dprA-mKate2, cclA<sup>cinbox-</sup>; Spc<sup>R</sup></i>                                                    | This study |  |
| R4446 | <i>comC0, radA-gfp, dprA-mKate2, cinA<sup>cinbox-</sup>; Spc<sup>R</sup></i>                                                    | This study |  |
| R4447 | <i>comC0, radA-gfp, dprA-mKate2, spr1831<sup>cinbox-</sup>; Spc<sup>R</sup></i>                                                 | This study |  |
| R4448 | <i>comC0, radA-gfp, dprA-mKate2, spr1334<sup>cinbox-</sup>; Spc<sup>R</sup></i>                                                 | This study |  |
| R4451 | <i>comC0, comX1-gfp</i>                                                                                                         | This study |  |
| R4461 | <i>comC0, comX1-gfp, comX2::tet; Tet<sup>R</sup></i>                                                                            | This study |  |
| R4465 | <i>comC0, comX1-gfp, comX2::tet, ssbB-luc; Tet<sup>R</sup>, Cm<sup>R</sup></i>                                                  | This study |  |
| R4466 | <i>comC0, ssbB-luc, comX1::ery; Cm<sup>R</sup>, Ery<sup>R</sup></i>                                                             | This study |  |
| R4467 | <i>comC0, ssbB-luc, comX2::tet; Cm<sup>R</sup>, Tet<sup>R</sup></i>                                                             | This study |  |
| R4468 | <i>comC0, comX1-gfp, hexA::ermAM; Ery<sup>R</sup></i>                                                                           | This study |  |
| R4469 | <i>comC0, comX1-gfp, ΔdprA::kan; Kan<sup>R</sup></i>                                                                            | This study |  |
| R4471 | <i>comC0, comX1-gfp, ssbB-luc; Cm<sup>R</sup></i>                                                                               | This study |  |
| R4472 | <i>comC0, comX1-yfp, hexA::ermAM; Ery<sup>R</sup></i>                                                                           | This study |  |



| R4473                       | <i>comC0, comX1-yfp, hexA::ermAM, dprA-mTurquoise</i> ; Ery <sup>R</sup> , Spc <sup>R</sup>                                                                                                                                            | This study              |  |
|-----------------------------|----------------------------------------------------------------------------------------------------------------------------------------------------------------------------------------------------------------------------------------|-------------------------|--|
| R4489                       | <i>comC0, CEP<sub>R</sub>-dprA-gfp, dprA::spc<sup>21C</sup>, CEP<sub>II</sub><sub>R</sub>-comX</i> ; Kan <sup>R</sup> , Spc <sup>R</sup> , Ery <sup>R</sup>                                                                            | This study              |  |
| R4492                       | <i>comC0, CEP<sub>R</sub>-dprA-gfp, dprA::spc<sup>21C</sup>, comC-luc</i> ; Kan <sup>R</sup> , Spc <sup>R</sup> , Cm <sup>R</sup>                                                                                                      | This study              |  |
| R4493                       | <i>comC0, CEP<sub>R</sub>-dprA-gfp, dprA::spc<sup>21C</sup>, CEP<sub>II</sub><sub>R</sub>-comX, comC-luc</i> ; Kan <sup>R</sup> , Spc <sup>R</sup> , Ery <sup>R</sup> , Cm <sup>R</sup>                                                | This study              |  |
| R4498                       | <i>comC2D1, CEP<sub>lac</sub>-dprA, dprA::spc<sup>21C</sup>, CEP<sub>II</sub><sub>R</sub>-comX</i> ; Kan <sup>R</sup> , Spc <sup>R</sup> , Ery <sup>R</sup>                                                                            | This study              |  |
| R4500                       | <i>comC2D1, CEP<sub>lac</sub>-dprA, dprA::spc<sup>21C</sup>, CEP<sub>II</sub><sub>R</sub>-comX, comC-luc</i> ; Kan <sup>R</sup> , Spc <sup>R</sup> , Ery <sup>R</sup> , Cm <sup>R</sup>                                                | This study              |  |
| R4509                       | <i>comC2D1, CEP<sub>lac</sub>-dprA, dprA::spc<sup>21C</sup>, CEP<sub>II</sub><sub>R</sub>-comX, comC-luc, Δ<i>comW</i>::<i>trim</i></i> ; Kan <sup>R</sup> , Spc <sup>R</sup> , Ery <sup>R</sup> , Cm <sup>R</sup> , Trim <sup>R</sup> | This study              |  |
| R4511                       | <i>comC2D1, CEP<sub>lac</sub>-dprA, dprA::spc<sup>21C</sup>, comC-luc</i> ; Kan <sup>R</sup> , Spc <sup>R</sup> , Cm <sup>R</sup>                                                                                                      | This study              |  |
| R4513                       | <i>comC0, comW-gfp, comW<sup>+</sup></i>                                                                                                                                                                                               | This study              |  |
| R4514                       | <i>comC0, comX1-gfp, hexA::ermAM, dprA<sup>AR</sup></i> ; Ery <sup>R</sup>                                                                                                                                                             | This study              |  |
| R4573                       | <i>comC0, dprA-gfp, hexA::ermAM; CEP<sub>R</sub>-comXW, ssbB-luc</i> ; Spc <sup>R</sup> , Ery <sup>R</sup> , Kan <sup>R</sup> , Cm <sup>R</sup>                                                                                        | This study              |  |
| R4574                       | <i>Δ<i>comCDE</i>::<i>trim</i></i> ; Trim <sup>R</sup>                                                                                                                                                                                 | This study              |  |
| R4575                       | <i>comC0, Δ<i>comW</i>::<i>trim</i></i> ; Trim <sup>R</sup>                                                                                                                                                                            | This study              |  |
|                             |                                                                                                                                                                                                                                        |                         |  |
|                             |                                                                                                                                                                                                                                        |                         |  |
| Plasmid                     | Genotype                                                                                                                                                                                                                               | Source/reference        |  |
| pAO0                        | pUC19 derivative with <i>spc</i> gene under control of strong pneumococcal promoter; Spc <sup>R</sup>                                                                                                                                  | This study              |  |
| pEMcat                      | Plasmid carrying Cm <sup>R</sup> in a minitransposon cassette for <i>mariner</i> mutagenesis; Cm <sup>R</sup>                                                                                                                          | (Akerley et al., 1998)  |  |
| pMB42                       | pAO0-derived plasmid possessing ' <i>dprA-gfp</i> '; Spc <sup>R</sup>                                                                                                                                                                  | This study              |  |
| pMB42-dprA <sup>AR</sup>    | pMB42 possessing <i>dprA<sup>AR</sup></i> sequence                                                                                                                                                                                     | This study              |  |
| pMB42-dprA <sup>QNG</sup>   | pMB42 possessing <i>dprA<sup>QNG</sup></i> sequence                                                                                                                                                                                    | This study              |  |
| pMB42-mTurquoise            | pMB42 possessing <i>mTurquoise</i> sequence                                                                                                                                                                                            | This study              |  |
| pMB42-mKate2                | pMB42 possessing <i>mKate2</i> sequence                                                                                                                                                                                                | This study              |  |
| pCEP <sub>R</sub> -luc      | pCEP derivative with the <i>luc</i> gene under control of P <sub>R</sub> ; Kan <sup>R</sup> , Spc <sup>R</sup>                                                                                                                         | (Johnston et al., 2016) |  |
| pCEP <sub>R</sub> -dprA-gfp | pCEP <sub>R</sub> -luc derivative with <i>luc</i> replaced by <i>dprA-gfp</i> ; Kan <sup>R</sup> , Spc <sup>R</sup>                                                                                                                    | This study              |  |
| pCEP <sub>R</sub> -comXW    | pCEP <sub>R</sub> -luc derivative with <i>luc</i> replaced by <i>comX</i> and <i>comW</i> ; Kan <sup>R</sup> , Spc <sup>R</sup>                                                                                                        | This study              |  |
| pCEPlac-dprA-gfp            | pCEP <sub>R</sub> -dprA-gfp derivative with P <sub>R</sub> replaced with P <sub>lac</sub> , as well as a P <sub>syn</sub> promoter controlling <i>lacI</i> expression; Kan <sup>R</sup> , Spc <sup>R</sup>                             | This study              |  |

|                                |                                                                                                                                                                      |                              |                              |
|--------------------------------|----------------------------------------------------------------------------------------------------------------------------------------------------------------------|------------------------------|------------------------------|
| pUC57-CEPII <sub>R</sub> -comX | pUC57 derivative with P <sub>R</sub> -comX and Ery <sup>R</sup> flanked by sequences homologous to <i>cpsN</i> and <i>cpsO</i> ; Amp <sup>R</sup> , Ery <sup>R</sup> | Genscript, USA               |                              |
| pMK111                         | <i>bgaA'</i> -P <sub>Zn</sub> -tet <sup>R</sup> -mKate2-parBp <sup>mut</sup> -m(sf)gfp, 'bgaA; Amp <sup>R</sup> , Kan <sup>R</sup>                                   | (van Raaphorst et al., 2017) |                              |
|                                |                                                                                                                                                                      |                              |                              |
| <b>Primer</b>                  | <b>Sequence (5'-3')<sup>b</sup></b>                                                                                                                                  | <b>Source/reference</b>      | <b>Use</b>                   |
| BM105                          | ATTCGCAAGCTTCCCTTGAAGTAGTCGAAG                                                                                                                                       | (Guiral et al., 2006)        | CEP <sub>lac</sub> -dprA-gfp |
| CJ379                          | AGTTTTGGAAGTATTTTGTCATCTA                                                                                                                                            | This study                   | comE-gfp                     |
| CJ380                          | CCTTTAGAAACCATTCCGGAACCCTCGAGCTTTTGAGATTTTTCTCTAAAATATCTT                                                                                                            | This study                   | comE-gfp                     |
| CJ381                          | AAGATATTTTAGAGAAAAATCTCAAAGCTCGAGGGTCCGGAATGGTTTCTAAAGG                                                                                                              | This study                   | comE-gfp                     |
| CJ382                          | CATTATATCAATTTCTTGCTAATTGTCAATTATTTATACAATTCATCCATACCATGTG                                                                                                           | This study                   | comE-gfp                     |
| CJ383                          | CACATGGTATGGATGAATTGTATAATAATTGACAATTAGCAAGAAATTGATATAATG                                                                                                            | This study                   | comE-gfp                     |
| CJ384                          | CTATCAAAGAAGTAGAAGTAATAGG                                                                                                                                            | This study                   | comE-gfp                     |
| CJ385                          | TTACAAGAAAAACATTTTAGGAGA                                                                                                                                             | This study                   | ΔcomCDE::trim                |
| CJ410                          | GCGCCATGGCCTAATTAGCTGAAGGAGGAATA                                                                                                                                     | This study                   | CEP <sub>R</sub> -dprA-gfp   |
| CJ411                          | GCGGGATCCTTATTTATACAATTCATCCATACCAT                                                                                                                                  | This study                   | CEP <sub>R</sub> -dprA-gfp   |
| CJ431                          | GCGCTCGAGTCTAGAGGATCTGGTGGAGAAGCTGCAGC                                                                                                                               | This study                   | dprA-mkate2                  |
| CJ432                          | GCGAAGCTTTAACGGTGTCCCAATTTACTAGGCAAAT                                                                                                                                | This study                   | dprA-mkate2                  |
| CJ454                          | GCGCTCGAGTTATTTATACAATTCATCCATACC                                                                                                                                    | This study                   | dprA-mTurquoise              |
| CJ455                          | GCGCTCGAGATGGTTTCTAAAGGTGAAGAATTG                                                                                                                                    | This study                   | dprA-mTurquoise              |
| CJ471                          | TCTAGAACTAGTGGATCCCCGGGCTGCAGATAATAAAATCTCCTAAAATGTTTTTCTT                                                                                                           | This study                   | ΔcomCDE::trim                |
| CJ472                          | AAGAAAAAACATTTTAGGAGATTTTATTATCTGCAGCCCCGGGGATCCACTAGTTCTAGA                                                                                                         | This study                   | ΔcomCDE::trim                |
| CJ473                          | TCACTTTTGAGATTTTTTCTCTAAAATATCTCAAAGCTTATCGATACCGTGCACCTCGAG                                                                                                         | This study                   | ΔcomCDE::trim                |
| CJ474                          | CTCGAGGTCGACGGTATCGATAAGCTTTGAGATATTTAGAGAAAAATCTCAAAGTGA                                                                                                            | This study                   | ΔcomCDE::trim                |
| CJ496                          | ACCTTTAGAAACCATTCCGGAACCCTCGAGAAATTCAAATTCGCAAGAACATCTTGCC                                                                                                           | This study                   | CEP <sub>lac</sub> -dprA-gfp |
| CJ497                          | GGCAAGATGTTCTTGCGGAATTTGAATTTCTCGAGGGTTCGGAATGGTTTCTAAAGGT                                                                                                           | This study                   | CEP <sub>lac</sub> -dprA-gfp |
| CJ498                          | ACATTATCCATTAATAAATCAAACGGATCCTTATTTATACAATTCATCCATACCATGTG                                                                                                          | This study                   | CEP <sub>lac</sub> -dprA-gfp |
| CJ499                          | CACATGGTATGGATGAATTGTATAATAAGGATCCGTTTGATTTTAAATGGATAATGT                                                                                                            | This study                   | CEP <sub>lac</sub> -dprA-gfp |
| CJ500                          | GCGCCAAGAGGAAGGATTGATCAA                                                                                                                                             | This study                   | CEP <sub>lac</sub> -dprA-gfp |
| CJ508                          | GTCGCTCATTAAGGTCAGTTAAT                                                                                                                                              | This study                   | comW-gfp                     |
| CJ513                          | CTAAAATATTTGTTTGTTACGACC                                                                                                                                             | This study                   | comW-gfp                     |
| CJ514                          | CCTTTAGAAACCATTCCGGAACCCTCGAGACAAGAAATAAACCCCGATTCAATACCA                                                                                                            | This study                   | comW-gfp                     |

|       |                                                             |            |                                   |
|-------|-------------------------------------------------------------|------------|-----------------------------------|
| CJ515 | TGGTAATGAATCGGGGGTTTATTTCTTGTCTCGAGGGTTCCGGAATGGTTTCTAAAGG  | This study | <i>comW-gfp</i>                   |
| CJ516 | AATTAGTTCGAAATTTACTAAAATTACCTTATTTATAACAATTCATCCATACCATGTG  | This study | <i>comW-gfp</i>                   |
| CJ517 | CACATGGTATGGATGAATTGTATAAATAAGGTAATTTTAGTAAATTTCCGAACATAATT | This study | <i>comW-gfp</i>                   |
| CJ559 | GCGGATGAAACAGGATTCGATACTTAT                                 | This study | $\Delta$ <i>comW::trim</i>        |
| CJ560 | TCTAGAAGTGGATCCCCGGGCTGCAGAATCAAATACTCCTTTTCTTTTTATAAA      | This study | $\Delta$ <i>comW::trim</i>        |
| CJ561 | TTTATAAAAAAGAAAAGGAGTATTTGATTCTGCAGCCCGGGGATCCACTAGTTCTAGA  | This study | $\Delta$ <i>comW::trim</i>        |
| CJ562 | AATTAGTTCGAAATTTACTAAAATTACCAAGCTTATCGATACCGTCGACCTCGAGGG   | This study | $\Delta$ <i>comW::trim</i>        |
| CJ563 | CCCTCGAGGTCGACGGTATCGATAAGCTTGGTAATTTTAGTAAATTTCCGAACATAATT | This study | $\Delta$ <i>comW::trim</i>        |
| CJ564 | GCGCCGTCTATAGTATACCCGACCTAT                                 | This study | $\Delta$ <i>comW::trim</i>        |
| CJ643 | GCGATACATGATTGCACTTCCTAAAGA                                 | This study | <i>comX1-gfp</i>                  |
| CJ644 | TCTTCACCTTTAGAAACCATTCCGGAACCTCGAGATGGGTACGGATAGTAAACT      | This study | <i>comX1-gfp</i>                  |
| CJ645 | AGTTTACTATCCGTACCCATCTCGAGGGTTCCGGAATGGTTTCTAAAGGTGAAGA     | This study | <i>comX1-gfp</i>                  |
| CJ646 | ATTTTTTTCATTTTTTTTGCATGACTTATTATTTATAACAATTCATCCATACCATGT   | This study | <i>comX1-gfp</i>                  |
| CJ647 | ACATGGTATGGATGAATTGTATAAATAATAAGTCATGCAAAAAAATGAAAAAAT      | This study | <i>comX1-gfp</i>                  |
| CJ648 | GCGGAGAGCCGCTTTCGCCACCGGTGT                                 | This study | <i>comX1-gfp</i>                  |
| DDL48 | GTGATATAATAAAAAGAGAAGAAATATGACTGTACGTCAT                    | This study | <i>spr0031</i> <sup>cinbox-</sup> |
| DDL49 | CAAGTATTTTTCAAACCTTTTAGGATCCTAATAGATAGAGCCAGAGAAT           | This study | <i>spr0031</i> <sup>cinbox-</sup> |
| DDL50 | ATTCTCTGGCTCTATCTATTAGGATCCTAAAAGTTTGAAAAATACTTG            | This study | <i>spr0031</i> <sup>cinbox-</sup> |
| DDL51 | ATTTTCGCTGAGTTTTTCAAGTAAAATAGGCTCTGTTTCT                    | This study | <i>spr0031</i> <sup>cinbox-</sup> |
| DDL52 | CCGATGGCAAAAACGCCGACTTCTTCAGGTTTAAGAGTGT                    | This study | <i>cibA</i> <sup>cinbox-</sup>    |
| DDL53 | GCTCACTTTTCCTTTTCTTAGGATCCTAAAAGTGAACAAGAAAAA               | This study | <i>cibA</i> <sup>cinbox-</sup>    |
| DDL54 | TTTTTCTTGTTCACTTTTAAGGATCCTAAAGAAAAGGAAAAGTGAGC             | This study | <i>cibA</i> <sup>cinbox-</sup>    |
| DDL55 | TCACGTCCTTTCGGTAATCCCTGCTTCTGCCAATGCCTC                     | This study | <i>cibA</i> <sup>cinbox-</sup>    |
| DDL56 | CTCACACTTGCTTCAATGTTGAATGAATTAGACATAAGAG                    | This study | <i>comEA</i> <sup>cinbox-</sup>   |
| DDL57 | TATTTTCTCCTCTCTTAGATAGGATCCTAGAGGAAGAAAAACAGTCG             | This study | <i>comEA</i> <sup>cinbox-</sup>   |
| DDL58 | CGACTGTTTTTCTTCTCTAGGATCCTATCTAAGAGAGGAGAAAATA              | This study | <i>comEA</i> <sup>cinbox-</sup>   |
| DDL59 | AGTCAGCCATTTCACTTTTCTTGGGTCAAGCCCAATCGC                     | This study | <i>comEA</i> <sup>cinbox-</sup>   |
| DDL60 | GATAAGCGTAAGCATTCAAAAAAGACAAGAAGAAAAAG                      | This study | <i>coiA</i> <sup>cinbox-</sup>    |
| DDL61 | AATCCCTCCTTTTCTATATAGGATCCTAAAAGAAAAAAGATCAGGA              | This study | <i>coiA</i> <sup>cinbox-</sup>    |
| DDL62 | TCCTGATCTTTTTCTTTTAGGATCCTATATAGAAAAGGAGGGAATT              | This study | <i>coiA</i> <sup>cinbox-</sup>    |
| DDL63 | GCTCCAGCCAATAATTCTTCTTACGTTGTGAAAGAAGCT                     | This study | <i>coiA</i> <sup>cinbox-</sup>    |
| DDL64 | TTTGTCAAGGTCTTGAATCTTCTTAAACAAGCCTTGT                       | This study | <i>dprA</i> <sup>cinbox-</sup>    |

|       |                                                   |            |                                   |
|-------|---------------------------------------------------|------------|-----------------------------------|
| DDL65 | TTTGATTTTTTACGAACCTTAGGATCCTGATAGATGAGTAGAAAAAGA  | This study | <i>dprA</i> <sup>cinbox-</sup>    |
| DDL66 | TCTTTTTCTACTCATCTATCAGGATCCTAAAGTTCGTAATAAATCAA   | This study | <i>dprA</i> <sup>cinbox-</sup>    |
| DDL67 | CTCTTGGTAAAAGAAGGGAAAGTTCGCCTCTCAATTTCTTAAATATT   | This study | <i>dprA</i> <sup>cinbox-</sup>    |
| DDL68 | CTGTGAAAGGTAACCACGGTCAAACCTGCATTCTTCTACG          | This study | <i>ssbB</i> <sup>cinbox-</sup>    |
| DDL69 | TGTAACCTTTTTTGTATTCAGGATCCTGATAAGTAGGAGGAAGAAAA   | This study | <i>ssbB</i> <sup>cinbox-</sup>    |
| DDL70 | TTTTCTTCCTCCTACTTATCAGGATCCTGGAAATCAAAAAAGTTACA   | This study | <i>ssbB</i> <sup>cinbox-</sup>    |
| DDL71 | ACAATGATTTTTACGTATAACAAAGAACATGTCGGTGATG          | This study | <i>ssbB</i> <sup>cinbox-</sup>    |
| DDL72 | GAAAAGACACTCATCTTAGAACTTCTTTTATAAAAAGTGA          | This study | <i>comGA</i> <sup>cinbox-</sup>   |
| DDL73 | TTTTTATTTTTCTAACTCTTAGGATCCTGTATAGGTGAGGAGGTAAGT  | This study | <i>comGA</i> <sup>cinbox-</sup>   |
| DDL74 | ACTTACCTCCTCACCTATACAGGATCCTAAGAGTTAGAAAAATAAAAA  | This study | <i>comGA</i> <sup>cinbox-</sup>   |
| DDL75 | ACTTGCCAAAGTGGTACCATTCTTGGCCACGAAGGGATTG          | This study | <i>comGA</i> <sup>cinbox-</sup>   |
| DDL76 | TGATAGCGCAAATAAGAAAAATGTCAAGGAAACTGCTTA           | This study | <i>cbpD</i> <sup>cinbox-</sup>    |
| DDL77 | TTCTCACTTTTTCTTTTTCAAGGATCCTTTTAGGTGAAGGCAATCATC  | This study | <i>cbpD</i> <sup>cinbox-</sup>    |
| DDL78 | GATGATTGCCTTACCTAAAAGGATCCTTGAAAAAGAAAAAGTGAGAA   | This study | <i>cbpD</i> <sup>cinbox-</sup>    |
| DDL79 | GTGGTGATGCCATAGATGCAACAACGGTTCGTAATCCT            | This study | <i>cbpD</i> <sup>cinbox-</sup>    |
| DDL80 | CACTTTGTTGACAACTCTGTTTTCATACAATTTGGACAGT          | This study | <i>comFA</i> <sup>cinbox-</sup>   |
| DDL81 | TCATCTAAAGTGCTAGTTTTAGGATCCTTAGAAGTATGAAAGTAAATTT | This study | <i>comFA</i> <sup>cinbox-</sup>   |
| DDL82 | AAATTTACTTTTACACTTCTAAGGATCCTAAAAGTACTTTAGATGA    | This study | <i>comFA</i> <sup>cinbox-</sup>   |
| DDL83 | CTAATCCATCTTTACCGAAAGCAGCTAGTATCTCAGCTCC          | This study | <i>comFA</i> <sup>cinbox-</sup>   |
| DDL84 | ATGGCTCCATTTTATGGATTACTGCCTCATTCTACTGA            | This study | <i>spr0182</i> <sup>cinbox-</sup> |
| DDL85 | ATCCCCTCCTCTTTCTTTCAAGGATCCTAAAGACAAGAAAAATAGGTC  | This study | <i>spr0182</i> <sup>cinbox-</sup> |
| DDL86 | GACCTATTTTTCTGTCTTTAGGATCCTGAAAGAAAGAGGAGGGGAAT   | This study | <i>spr0182</i> <sup>cinbox-</sup> |
| DDL87 | CCGTATTTGTCTCCTCTTTTACCAAATCAGCAAGACGATT          | This study | <i>spr0182</i> <sup>cinbox-</sup> |
| DDL88 | GATATTTAACCCTCTTTCCAGAGATGTTTTCTCCACTGG           | This study | <i>spr0690</i> <sup>cinbox-</sup> |
| DDL89 | CTTTTTTAGTTTCATTAGTTAGGATCCTAAATCTGTAGATTTTAGGA   | This study | <i>spr0690</i> <sup>cinbox-</sup> |
| DDL90 | TCCTAAAATCTACAAGATTTAGGATCCTAACTAATGAACTAAAAAAG   | This study | <i>spr0690</i> <sup>cinbox-</sup> |
| DDL91 | ACAGAAGAGCAAGCTATTAAGAATACGGTCAAGACCAAAA          | This study | <i>spr0690</i> <sup>cinbox-</sup> |
| DDL92 | AGTCGATAATGGCGATAGGAGCATCAAGATATTCAGCCAG          | This study | <i>spr1003</i> <sup>cinbox-</sup> |
| DDL93 | ATTTTGCTTACGATATTGCTAGGATCCTCCACGAAGTTTAACTTTAA   | This study | <i>spr1003</i> <sup>cinbox-</sup> |
| DDL94 | TTAAAGATTAACTTCGTGGAGGATCCTAGCAATATCGTAAGCAAAAT   | This study | <i>spr1003</i> <sup>cinbox-</sup> |
| DDL95 | GGCCAGCAATCCCTTAGAAACCTCGTGCTTTTTTAAAAAG          | This study | <i>spr1003</i> <sup>cinbox-</sup> |
| DDL96 | GAAAATTACCGCTCAACCAAAACCATTCTTCAAGCGGCCA          | This study | <i>radC</i> <sup>cinbox-</sup>    |

|        |                                                                 |                      |                                   |
|--------|-----------------------------------------------------------------|----------------------|-----------------------------------|
| DDL97  | AAAAATCCTCCTCACTTTATAGGATCCTAGAAAGGATGGAAAATTAGAT               | This study           | <i>radC</i> <sup>cinbox-</sup>    |
| DDL98  | ATCTAATTTTCCATCCTTCTAGGATCCTATAAAGTGAGGAGGATTTTT                | This study           | <i>radC</i> <sup>cinbox-</sup>    |
| DDL99  | TCGTTCAAGTATGTCGATTTGACAAGTGAACCTCAAACCCT                       | This study           | <i>radC</i> <sup>cinbox-</sup>    |
| DDL101 | ACAGCATGAAGCAGACTCAGTAAGCCTTCAAGATCGCGTA                        | This study           | <i>cclA</i> <sup>cinbox-</sup>    |
| DDL102 | AAAAATCAATCATACTTATCAGGATCCTAAAAATGGGAGAAATAGTAT                | This study           | <i>cclA</i> <sup>cinbox-</sup>    |
| DDL103 | ATACTATTTCTCCATTTTTAGGATCCTGATAAGTATGATTGATTTTT                 | This study           | <i>cclA</i> <sup>cinbox-</sup>    |
| DDL104 | TGAGGAATTGGCTCTTTATGCCAGGGAAAAATTAGGTATT                        | This study           | <i>cclA</i> <sup>cinbox-</sup>    |
| DDL105 | TTGCTCCGCACGTTCAACCAACGCATGATTGATCCTTTA                         | This study           | <i>cinA</i> <sup>cinbox-</sup>    |
| DDL106 | CTGCGATTTTTCAAAAAAAGGATCCTGATAGGTAGGAGGAAACATG                  | This study           | <i>cinA</i> <sup>cinbox-</sup>    |
| DDL107 | CATGTTTCCTCCTACCTATCAGGATCCTTTTTTTTGAAAAATCGCAG                 | This study           | <i>cinA</i> <sup>cinbox-</sup>    |
| DDL108 | AGGAGATGGAAATATCCTCAACAAGCAAGCTAGTTCGGA                         | This study           | <i>cinA</i> <sup>cinbox-</sup>    |
| DDL109 | GCATCCAGAGCTTCCCATCAATCTCGCCACTATCATCTT                         | This study           | <i>rmuC</i> <sup>cinbox-</sup>    |
| DDL110 | TTAAAAAAGTGTACGCTTCTTGGATCCTTATAGATAGGGAAAGTGTCGG               | This study           | <i>rmuC</i> <sup>cinbox-</sup>    |
| DDL111 | CCGACACTTCCCTATCTATAAGGATCCAAGAAGCGTACACTTTTTTAA                | This study           | <i>rmuC</i> <sup>cinbox-</sup>    |
| DDL112 | ACACCAGGATTTTCATCCTTGGACTATGAAGTATCAAGGG                        | This study           | <i>rmuC</i> <sup>cinbox-</sup>    |
| DDL114 | GGAGCTCAAGCCGTC AATTGGGGAGCTTCAGGAGGGGGCTA                      | This study           | <i>spr1831</i> <sup>cinbox-</sup> |
| DDL115 | TTTATTTTTTTATTTTTCATAGGATCCTATATAGATGAAGGGGAAAGA                | This study           | <i>spr1831</i> <sup>cinbox-</sup> |
| DDL116 | TCTTTCCCTTCATCTATATAGGATCCTATGAAAAATAAAAAATAAA                  | This study           | <i>spr1831</i> <sup>cinbox-</sup> |
| DDL117 | ATCGAAAAATCTTCTGGATGCGTTTTGAACAGTAGTCC                          | This study           | <i>spr1831</i> <sup>cinbox-</sup> |
| DDL118 | TTTTCGAGTAAGTACGAAGATTGGATAACATCAAAGAAAG                        | This study           | <i>spr1334</i> <sup>cinbox-</sup> |
| DDL119 | ATAAGCTATTAGCTTTCTTTAGGATCCTAATAGATAGAAGCATAGAAT                | This study           | <i>spr1334</i> <sup>cinbox-</sup> |
| DDL120 | ATTCTATGCTTCTATCTATTAGGATCCTAAAGAAAGCTAATAGCTTAT                | This study           | <i>spr1334</i> <sup>cinbox-</sup> |
| DDL121 | GTTTAATGAGTTCAAAGATACGGCCAGGAGTTCCAATCAG                        | This study           | <i>spr1334</i> <sup>cinbox-</sup> |
| dprA22 | CTGAATTCTAGATGACTGTTATCCTTG                                     | This study           | pMB42                             |
| dprA23 | TCACTCGAGAAATTCAAATCCGCAAGAACATC                                | This study           | pMB42                             |
| MB117  | AATCTCCGCTGTAGGTCACCTTCTT                                       | (Marie et al., 2017) | <i>rpsL41</i>                     |
| MB120  | TTGGATTGGGTGTGCATTTGC                                           | (Marie et al., 2017) | <i>rpsL41</i>                     |
| MP216  | ATGAAAATTAAGTTGTAACAGTTGGG                                      | This study           | <i>gfp-comD</i>                   |
| MP217  | CAATTCTCACCTTTAGAAACCATTACTCTTTCCCCTTATTTCACTACT                | This study           | <i>gfp-comD</i>                   |
| MP218  | GTAATGAAATAAGGGGAAAGAGTAATGGTTTCTAAAGGTGAAGAATTG                | This study           | <i>gfp-comD</i>                   |
| MP219  | TCCGGAACCTCGAGTTTATAACAATTCATCCATACCATG                         | This study           | <i>gfp-comD</i>                   |
| MP220  | CATGGTATGGATGAATTGTATAAACTCGAGGGTCCGGAATGGATTTATTTGGATTTGGGACGG | This study           | <i>gfp-comD</i>                   |

|       |                                          |                        |                 |
|-------|------------------------------------------|------------------------|-----------------|
| MP221 | GCATAGACAATTGACTGAGCAACC                 | This study             | <i>gfp-comD</i> |
| OMB4  | AGACTCGAGGGTTCCGGAATGGTTTCTAAAGGTGAAG    | (Mirouze et al., 2013) | pMB42           |
| OMB5  | TGTAAGCTTGGATTATTATACAATTCATCCATACCATGTG | This study             | pMB42           |

**Table S3: Strains, plasmids and primers used in this study.**

<sup>a</sup> Antibiotic resistances: Spc<sup>R</sup>, spectinomycin; Kan<sup>R</sup>, kanamycin; Trim<sup>R</sup>, trimethoprim; Sm<sup>R</sup>, streptomycin; Cm<sup>R</sup>, chloramphenicol; Rif<sup>R</sup>, rifampicin; Nov<sup>R</sup>, novobiocin; Ery<sup>R</sup>, erythromycin; Tet<sup>R</sup>, tetracycline; Amp<sup>R</sup>, ampicillin.

<sup>b</sup> Underlined, italic bases represent restriction sites used for cloning.
